# Supplementary material for: A Copula Type-Model for Examining the Role of Microbiome as a Potential Tool in Diagnosis
Source: Hindawi journal article supplement (doi:10.1155/2022/8033806), 2022-06-06
Supplement: f1 [file 8033806.f1.zip]

Archive with 2 entries (2 files):
- 8033806.f1/Metadata (1).txt
- 8033806.f1/Table_S1_ABbundance.txt
