# Supplementary material for: A Copula Type-Model for Examining the Role of Microbiome as a Potential Tool in Diagnosis
Source: Hindawi journal article supplement (doi:10.1155/2022/8033806), 2022-06-06
Supplement: f1 [file 8033806.f1.zip › 8033806.f1/Metadata (1).txt]

7072	Cochin	South	Male	18	Sedentary	20.98	Non-Obese
7098	Cochin	South	Female	18	NonSedentary	15.24	Non-Obese
8008	Mumbai	West	Male	18	Sedentary	19.33	Non-Obese
8033	Mumbai	West	Female	18	Sedentary	18.66	Non-Obese
12077	Patna	East	Male	18	Sedentary	18.34	Non-Obese
13023	NewDelhi	North	Male	18	Sedentary	21.53	Non-Obese
13033	NewDelhi	North	Female	18	NonSedentary	20.24	Non-Obese
13040	NewDelhi	North	Female	18	Sedentary	34.17	Obese
13042	NewDelhi	North	Female	18	NonSedentary	29.97	Non-Obese
13045	NewDelhi	North	Male	18	NonSedentary	19.05	Non-Obese
14025	Kolkata	East	Male	18	NonSedentary	25.56	Non-Obese
14037	Kolkata	East	Female	18	NonSedentary	21.17	Non-Obese
14078	Kolkata	East	Male	18	NonSedentary	22.89	Non-Obese
14079	Kolkata	East	Male	18	NonSedentary	23.50	Non-Obese
1044	Chennai	South	Male	19	NonSedentary	18.73	Non-Obese
1046	Chennai	South	Female	19	NonSedentary	24.56	Non-Obese
1077	Chennai	South	Female	19	NonSedentary	30.49	Obese
1078	Chennai	South	Female	19	NonSedentary	30.04	Obese
7099	Cochin	South	Male	19	Sedentary	16.45	Non-Obese
8039	Mumbai	West	Female	19	NonSedentary	19.13	Non-Obese
11040	Lucknow	North	Male	19	NonSedentary	27.11	Non-Obese
13006	NewDelhi	North	Male	19	NonSedentary	25.12	Non-Obese
13025	NewDelhi	North	Male	19	Sedentary	21.60	Non-Obese
14054	Kolkata	East	Female	19	NonSedentary	31.09	Obese
14055	Kolkata	East	Male	19	NonSedentary	20.56	Non-Obese
14082	Kolkata	East	Female	19	NonSedentary	32.04	Obese
1070	Chennai	South	Female	20	NonSedentary	30.18	Obese
1073	Chennai	South	Female	20	NonSedentary	30.49	Obese
1076	Chennai	South	Female	20	NonSedentary	30.10	Obese
2022	Ahmedabad	West	Female	20	NonSedentary	20.31	Non-Obese
3001	Nagpur	West	Female	20	NonSedentary	16.72	Non-Obese
3003	Nagpur	West	Female	20	NonSedentary	15.93	Non-Obese
3012	Nagpur	West	Female	20	NonSedentary	21.21	Non-Obese
3039	Nagpur	West	Female	20	NonSedentary	20.31	Non-Obese
5052	Bhopal	North	Male	20	Sedentary	24.96	Non-Obese
8017	Mumbai	West	Male	20	NonSedentary	22.86	Non-Obese
8024	Mumbai	West	Female	20	Sedentary	30.30	Obese
8040	Mumbai	West	Male	20	Sedentary	30.85	Obese
8042	Mumbai	West	Male	20	Sedentary	26.42	Non-Obese
8054	Mumbai	West	Male	20	Sedentary	30.48	Obese
9002	Guwahati	East	Male	20	NonSedentary	32.09	Obese
9020	Guwahati	East	Male	20	NonSedentary	26.67	Non-Obese
9027	Guwahati	East	Female	20	NonSedentary	22.22	Non-Obese
9039	Guwahati	East	Male	20	NonSedentary	21.88	Non-Obese
9051	Guwahati	East	Male	20	NonSedentary	28.07	Non-Obese
9053	Guwahati	East	Male	20	NonSedentary	28.99	Non-Obese
9057	Guwahati	East	Male	20	NonSedentary	28.88	Non-Obese
9067	Guwahati	East	Male	20	NonSedentary	26.26	Non-Obese
11053	Lucknow	North	Male	20	Sedentary	20.72	Non-Obese
13001	NewDelhi	North	Female	20	NonSedentary	19.37	Non-Obese
13013	NewDelhi	North	Male	20	NonSedentary	24.80	Non-Obese
13026	NewDelhi	North	Female	20	Sedentary	17.15	Non-Obese
13036	NewDelhi	North	Male	20	NonSedentary	23.03	Non-Obese
14031	Kolkata	East	Male	20	NonSedentary	20.57	Non-Obese
1041	Chennai	South	Female	21	NonSedentary	30.38	Obese
1069	Chennai	South	Female	21	NonSedentary	30.84	Obese
1071	Chennai	South	Female	21	NonSedentary	30.47	Obese
1074	Chennai	South	Female	21	NonSedentary	30.22	Obese
1082	Chennai	South	Female	21	NonSedentary	30.08	Obese
1086	Chennai	South	Female	21	NonSedentary	28.67	Non-Obese
2015	Ahmedabad	West	Male	21	Sedentary	17.57	Non-Obese
2028	Ahmedabad	West	Male	21	NonSedentary	25.01	Non-Obese
3024	Nagpur	West	Male	21	NonSedentary	20.44	Non-Obese
5018	Bhopal	North	Male	21	Sedentary	22.78	Non-Obese
6005	Mangalore	South	Female	21	NonSedentary	15.81	Non-Obese
6013	Mangalore	South	Female	21	NonSedentary	18.22	Non-Obese
8007	Mumbai	West	Female	21	Sedentary	18.49	Non-Obese
8018	Mumbai	West	Male	21	NonSedentary	30.47	Obese
9070	Guwahati	East	Male	21	NonSedentary	28.96	Non-Obese
10020	Ludhiana	North	Female	21	Sedentary	19.12	Non-Obese
10056	Ludhiana	North	Male	21	NonSedentary	18.70	Non-Obese
10065	Ludhiana	North	Female	21	Sedentary	16.45	Non-Obese
11045	Lucknow	North	Male	21	Sedentary	36.74	Obese
13002	NewDelhi	North	Female	21	Sedentary	16.60	Non-Obese
13044	NewDelhi	North	Female	21	NonSedentary	22.04	Non-Obese
14026	Kolkata	East	Female	21	NonSedentary	30.77	Obese
14043	Kolkata	East	Female	21	NonSedentary	32.76	Obese
1033	Chennai	South	Female	22	NonSedentary	23.95	Non-Obese
1040	Chennai	South	Female	22	NonSedentary	34.52	Obese
1059	Chennai	South	Female	22	NonSedentary	31.25	Obese
1067	Chennai	South	Female	22	NonSedentary	35.71	Obese
1075	Chennai	South	Female	22	NonSedentary	31.96	Obese
1087	Chennai	South	Male	22	NonSedentary	31.89	Obese
2039	Ahmedabad	West	Male	22	Sedentary	23.24	Non-Obese
2052	Ahmedabad	West	Female	22	Sedentary	31.22	Obese
3067	Nagpur	West	Male	22	NonSedentary	24.44	Non-Obese
5019	Bhopal	North	Male	22	Sedentary	22.48	Non-Obese
5020	Bhopal	North	Female	22	Sedentary	24.21	Non-Obese
5042	Bhopal	North	Male	22	NonSedentary	29.76	Non-Obese
5063	Bhopal	North	Male	22	Sedentary	30.11	Obese
6035	Mangalore	South	Male	22	NonSedentary	20.31	Non-Obese
6060	Mangalore	South	Male	22	Sedentary	31.64	Obese
7042	Cochin	South	Female	22	Sedentary	22.58	Non-Obese
8019	Mumbai	West	Male	22	NonSedentary	21.63	Non-Obese
8044	Mumbai	West	Male	22	Sedentary	19.13	Non-Obese
9009	Guwahati	East	Male	22	NonSedentary	28.06	Non-Obese
9041	Guwahati	East	Male	22	NonSedentary	28.83	Non-Obese
9061	Guwahati	East	Male	22	NonSedentary	27.39	Non-Obese
11016	Lucknow	North	Male	22	Sedentary	33.76	Obese
12008	Patna	East	Female	22	Sedentary	25.33	Non-Obese
12069	Patna	East	Female	22	Sedentary	31.11	Obese
13010	NewDelhi	North	Female	22	NonSedentary	20.18	Non-Obese
13037	NewDelhi	North	Male	22	NonSedentary	27.55	Non-Obese
1039	Chennai	South	Male	23	NonSedentary	25.39	Non-Obese
1072	Chennai	South	Female	23	NonSedentary	30.82	Obese
1081	Chennai	South	Female	23	NonSedentary	28.52	Non-Obese
3002	Nagpur	West	Female	23	NonSedentary	16.67	Non-Obese
3011	Nagpur	West	Male	23	NonSedentary	20.31	Non-Obese
4029	Ajmer	West	Male	23	NonSedentary	22.56	Non-Obese
8038	Mumbai	West	Male	23	NonSedentary	20.24	Non-Obese
9014	Guwahati	East	Male	23	Sedentary	31.53	Obese
9038	Guwahati	East	Male	23	NonSedentary	31.31	Obese
9052	Guwahati	East	Male	23	NonSedentary	28.76	Non-Obese
9060	Guwahati	East	Male	23	NonSedentary	28.84	Non-Obese
10003	Ludhiana	North	Female	23	NonSedentary	26.70	Non-Obese
10006	Ludhiana	North	Male	23	Sedentary	32.45	Obese
13024	NewDelhi	North	Female	23	Sedentary	21.48	Non-Obese
14039	Kolkata	East	Female	23	Sedentary	35.56	Obese
14077	Kolkata	East	Female	23	NonSedentary	31.77	Obese
1005	Chennai	South	Female	24	NonSedentary	28.40	Non-Obese
1035	Chennai	South	Male	24	NonSedentary	22.22	Non-Obese
2006	Ahmedabad	West	Male	24	Sedentary	23.88	Non-Obese
2041	Ahmedabad	West	Male	24	Sedentary	33.33	Obese
2044	Ahmedabad	West	Male	24	NonSedentary	34.13	Obese
2050	Ahmedabad	West	Male	24	Sedentary	30.49	Obese
2053	Ahmedabad	West	Female	24	Sedentary	32.05	Obese
2063	Ahmedabad	West	Female	24	NonSedentary	30.84	Obese
3056	Nagpur	West	Male	24	Sedentary	29.97	Non-Obese
3057	Nagpur	West	Male	24	NonSedentary	21.25	Non-Obese
4014	Ajmer	West	Male	24	NonSedentary	22.74	Non-Obese
5030	Bhopal	North	Female	24	NonSedentary	25.94	Non-Obese
6007	Mangalore	South	Female	24	NonSedentary	20.14	Non-Obese
6015	Mangalore	South	Female	24	NonSedentary	12.96	Non-Obese
6019	Mangalore	South	Male	24	NonSedentary	27.73	Non-Obese
6053	Mangalore	South	Male	24	Sedentary	26.45	Non-Obese
6056	Mangalore	South	Male	24	Sedentary	25.10	Non-Obese
6061	Mangalore	South	Male	24	Sedentary	30.09	Obese
7106	Cochin	South	Male	24	NonSedentary	26.21	Non-Obese
8020	Mumbai	West	Female	24	Sedentary	32.05	Obese
8059	Mumbai	West	Male	24	Sedentary	30.11	Obese
9001	Guwahati	East	Male	24	NonSedentary	29.34	Non-Obese
9004	Guwahati	East	Male	24	NonSedentary	31.94	Obese
9058	Guwahati	East	Male	24	NonSedentary	29.34	Non-Obese
9069	Guwahati	East	Male	24	NonSedentary	28.76	Non-Obese
10051	Ludhiana	North	Female	24	Sedentary	31.16	Obese
12003	Patna	East	Female	24	Sedentary	24.46	Non-Obese
12014	Patna	East	Male	24	Sedentary	25.40	Non-Obese
13035	NewDelhi	North	Male	24	Sedentary	23.88	Non-Obese
1010	Chennai	South	Male	25	NonSedentary	21.67	Non-Obese
1024	Chennai	South	Female	25	NonSedentary	30.18	Obese
1036	Chennai	South	Female	25	NonSedentary	19.23	Non-Obese
2002	Ahmedabad	West	Female	25	NonSedentary	22.77	Non-Obese
2004	Ahmedabad	West	Male	25	Sedentary	23.15	Non-Obese
2019	Ahmedabad	West	Male	25	NonSedentary	25.40	Non-Obese
2056	Ahmedabad	West	Male	25	Sedentary	31.24	Obese
3033	Nagpur	West	Female	25	NonSedentary	31.00	Obese
4021	Ajmer	West	Female	25	NonSedentary	22.66	Non-Obese
4068	Ajmer	West	Male	25	NonSedentary	21.80	Non-Obese
5038	Bhopal	North	Female	25	NonSedentary	27.66	Non-Obese
5061	Bhopal	North	Male	25	Sedentary	30.11	Obese
6010	Mangalore	South	Female	25	NonSedentary	17.10	Non-Obese
6054	Mangalore	South	Male	25	Sedentary	19.23	Non-Obese
7060	Cochin	South	Male	25	NonSedentary	21.42	Non-Obese
8014	Mumbai	West	Male	25	NonSedentary	19.72	Non-Obese
8015	Mumbai	West	Female	25	Sedentary	31.61	Obese
8021	Mumbai	West	Male	25	NonSedentary	31.46	Obese
8028	Mumbai	West	Female	25	Sedentary	22.67	Non-Obese
8050	Mumbai	West	Female	25	Sedentary	31.05	Obese
9003	Guwahati	East	Male	25	NonSedentary	25.11	Non-Obese
9011	Guwahati	East	Female	25	Sedentary	25.15	Non-Obese
9040	Guwahati	East	Female	25	NonSedentary	25.51	Non-Obese
9047	Guwahati	East	Female	25	NonSedentary	30.05	Obese
9054	Guwahati	East	Male	25	NonSedentary	31.05	Obese
9059	Guwahati	East	Male	25	NonSedentary	29.93	Non-Obese
10013	Ludhiana	North	Female	25	Sedentary	25.39	Non-Obese
10024	Ludhiana	North	Female	25	Sedentary	31.00	Obese
10032	Ludhiana	North	Female	25	Sedentary	30.14	Obese
10043	Ludhiana	North	Male	25	Sedentary	31.00	Obese
10046	Ludhiana	North	Male	25	Sedentary	31.85	Obese
11008	Lucknow	North	Female	25	NonSedentary	28.36	Non-Obese
11017	Lucknow	North	Male	25	Sedentary	32.39	Obese
11048	Lucknow	North	Male	25	NonSedentary	21.61	Non-Obese
12047	Patna	East	Male	25	Sedentary	26.09	Non-Obese
13004	NewDelhi	North	Male	25	Sedentary	25.81	Non-Obese
1048	Chennai	South	Female	26	NonSedentary	30.11	Obese
1054	Chennai	South	Female	26	NonSedentary	30.10	Obese
1057	Chennai	South	Female	26	NonSedentary	32.87	Obese
2001	Ahmedabad	West	Male	26	NonSedentary	25.01	Non-Obese
2018	Ahmedabad	West	Male	26	Sedentary	25.91	Non-Obese
2036	Ahmedabad	West	Male	26	NonSedentary	21.34	Non-Obese
3010	Nagpur	West	Male	26	NonSedentary	23.47	Non-Obese
3050	Nagpur	West	Female	26	Sedentary	31.48	Obese
3063	Nagpur	West	Female	26	Sedentary	26.56	Non-Obese
4011	Ajmer	West	Male	26	NonSedentary	24.80	Non-Obese
5004	Bhopal	North	Male	26	NonSedentary	24.91	Non-Obese
5032	Bhopal	North	Female	26	Sedentary	22.84	Non-Obese
5057	Bhopal	North	Female	26	NonSedentary	36.30	Obese
6012	Mangalore	South	Male	26	NonSedentary	34.89	Obese
6055	Mangalore	South	Male	26	NonSedentary	26.53	Non-Obese
7029	Cochin	South	Male	26	NonSedentary	26.31	Non-Obese
8051	Mumbai	West	Female	26	Sedentary	30.26	Obese
9010	Guwahati	East	Male	26	NonSedentary	25.78	Non-Obese
9064	Guwahati	East	Male	26	NonSedentary	29.76	Non-Obese
11009	Lucknow	North	Female	26	Sedentary	30.43	Obese
11029	Lucknow	North	Female	26	Sedentary	18.26	Non-Obese
11039	Lucknow	North	Male	26	Sedentary	27.01	Non-Obese
11054	Lucknow	North	Female	26	Sedentary	24.30	Non-Obese
12013	Patna	East	Male	26	Sedentary	25.22	Non-Obese
12045	Patna	East	Male	26	Sedentary	25.34	Non-Obese
12073	Patna	East	Female	26	Sedentary	22.04	Non-Obese
12079	Patna	East	Male	26	Sedentary	25.06	Non-Obese
14066	Kolkata	East	Male	26	NonSedentary	27.22	Non-Obese
1008	Chennai	South	Male	27	NonSedentary	37.34	Obese
1027	Chennai	South	Female	27	NonSedentary	24.34	Non-Obese
2020	Ahmedabad	West	Male	27	NonSedentary	27.72	Non-Obese
3004	Nagpur	West	Female	27	NonSedentary	20.24	Non-Obese
3019	Nagpur	West	Female	27	NonSedentary	18.34	Non-Obese
3020	Nagpur	West	Female	27	NonSedentary	24.89	Non-Obese
3023	Nagpur	West	Male	27	NonSedentary	23.83	Non-Obese
3046	Nagpur	West	Female	27	Sedentary	21.80	Non-Obese
3055	Nagpur	West	Male	27	Sedentary	30.18	Obese
4001	Ajmer	West	Male	27	NonSedentary	33.68	Obese
4002	Ajmer	West	Female	27	NonSedentary	22.43	Non-Obese
4020	Ajmer	West	Male	27	NonSedentary	25.47	Non-Obese
5046	Bhopal	North	Male	27	NonSedentary	30.00	Non-Obese
6065	Mangalore	South	Male	27	Sedentary	24.44	Non-Obese
6066	Mangalore	South	Male	27	Sedentary	30.86	Obese
7023	Cochin	South	Female	27	Sedentary	30.10	Obese
7105	Cochin	South	Male	27	NonSedentary	30.37	Obese
8013	Mumbai	West	Male	27	NonSedentary	23.42	Non-Obese
8031	Mumbai	West	Female	27	Sedentary	33.32	Obese
9012	Guwahati	East	Female	27	NonSedentary	22.03	Non-Obese
10045	Ludhiana	North	Male	27	NonSedentary	21.36	Non-Obese
12001	Patna	East	Female	27	Sedentary	30.30	Obese
12071	Patna	East	Male	27	Sedentary	27.68	Non-Obese
14048	Kolkata	East	Female	27	NonSedentary	25.89	Non-Obese
1032	Chennai	South	Male	28	NonSedentary	25.65	Non-Obese
2008	Ahmedabad	West	Male	28	Sedentary	23.66	Non-Obese
2017	Ahmedabad	West	Male	28	Sedentary	27.72	Non-Obese
2040	Ahmedabad	West	Female	28	Sedentary	30.45	Obese
2045	Ahmedabad	West	Male	28	Sedentary	33.73	Obese
2046	Ahmedabad	West	Female	28	NonSedentary	30.86	Obese
2049	Ahmedabad	West	Male	28	Sedentary	30.48	Obese
2055	Ahmedabad	West	Male	28	Sedentary	27.34	Non-Obese
2059	Ahmedabad	West	Female	28	Sedentary	27.55	Non-Obese
2067	Ahmedabad	West	Male	28	NonSedentary	30.86	Obese
3022	Nagpur	West	Male	28	NonSedentary	26.30	Non-Obese
3030	Nagpur	West	Female	28	NonSedentary	20.01	Non-Obese
3048	Nagpur	West	Female	28	NonSedentary	30.86	Obese
3059	Nagpur	West	Female	28	Sedentary	31.25	Obese
5009	Bhopal	North	Male	28	Sedentary	26.78	Non-Obese
5027	Bhopal	North	Female	28	NonSedentary	25.31	Non-Obese
5058	Bhopal	North	Male	28	NonSedentary	35.92	Obese
6057	Mangalore	South	Male	28	Sedentary	30.76	Obese
8004	Mumbai	West	Male	28	NonSedentary	23.66	Non-Obese
9007	Guwahati	East	Male	28	Sedentary	22.66	Non-Obese
9072	Guwahati	East	Male	28	NonSedentary	26.26	Non-Obese
10052	Ludhiana	North	Male	28	Sedentary	20.28	Non-Obese
11013	Lucknow	North	Male	28	NonSedentary	32.93	Obese
11036	Lucknow	North	Female	28	NonSedentary	26.90	Non-Obese
11059	Lucknow	North	Male	28	Sedentary	23.31	Non-Obese
11065	Lucknow	North	Male	28	NonSedentary	27.39	Non-Obese
12007	Patna	East	Female	28	Sedentary	27.27	Non-Obese
12027	Patna	East	Male	28	Sedentary	28.06	Non-Obese
12059	Patna	East	Female	28	Sedentary	28.01	Non-Obese
12062	Patna	East	Female	28	Sedentary	32.89	Obese
12075	Patna	East	Female	28	Sedentary	32.04	Obese
12080	Patna	East	Male	28	Sedentary	31.10	Obese
13014	NewDelhi	North	Male	28	Sedentary	31.02	Obese
14014	Kolkata	East	Female	28	NonSedentary	31.11	Obese
1004	Chennai	South	Female	29	NonSedentary	24.92	Non-Obese
1007	Chennai	South	Male	29	NonSedentary	24.39	Non-Obese
1011	Chennai	South	Male	29	NonSedentary	25.71	Non-Obese
1015	Chennai	South	Female	29	NonSedentary	21.91	Non-Obese
1084	Chennai	South	Male	29	NonSedentary	30.02	Obese
2048	Ahmedabad	West	Male	29	Sedentary	24.24	Non-Obese
2057	Ahmedabad	West	Male	29	Sedentary	31.25	Obese
2060	Ahmedabad	West	Male	29	Sedentary	30.42	Obese
2062	Ahmedabad	West	Female	29	NonSedentary	35.16	Obese
3025	Nagpur	West	Male	29	NonSedentary	21.93	Non-Obese
3032	Nagpur	West	Male	29	NonSedentary	26.61	Non-Obese
3034	Nagpur	West	Female	29	NonSedentary	24.11	Non-Obese
3058	Nagpur	West	Male	29	Sedentary	21.83	Non-Obese
3064	Nagpur	West	Male	29	Sedentary	22.75	Non-Obese
4025	Ajmer	West	Male	29	NonSedentary	31.54	Obese
4037	Ajmer	West	Male	29	NonSedentary	22.81	Non-Obese
5033	Bhopal	North	Male	29	NonSedentary	24.81	Non-Obese
6004	Mangalore	South	Female	29	NonSedentary	25.48	Non-Obese
6047	Mangalore	South	Male	29	Sedentary	30.47	Obese
6048	Mangalore	South	Male	29	Sedentary	30.48	Obese
7005	Cochin	South	Male	29	Sedentary	26.35	Non-Obese
7028	Cochin	South	Male	29	Sedentary	21.71	Non-Obese
7061	Cochin	South	Male	29	NonSedentary	24.16	Non-Obese
7096	Cochin	South	Female	29	NonSedentary	31.62	Obese
7104	Cochin	South	Male	29	NonSedentary	26.99	Non-Obese
8052	Mumbai	West	Male	29	NonSedentary	32.05	Obese
9005	Guwahati	East	Male	29	Sedentary	31.35	Obese
9013	Guwahati	East	Male	29	Sedentary	28.44	Non-Obese
10054	Ludhiana	North	Male	29	Sedentary	31.25	Obese
11007	Lucknow	North	Male	29	Sedentary	21.45	Non-Obese
12070	Patna	East	Male	29	Sedentary	26.30	Non-Obese
13019	NewDelhi	North	Male	29	Sedentary	31.95	Obese
13038	NewDelhi	North	Male	29	NonSedentary	29.03	Non-Obese
14036	Kolkata	East	Male	29	NonSedentary	25.17	Non-Obese
14047	Kolkata	East	Male	29	NonSedentary	27.55	Non-Obese
1017	Chennai	South	Male	30	NonSedentary	30.02	Obese
1043	Chennai	South	Female	30	NonSedentary	22.83	Non-Obese
1051	Chennai	South	Male	30	NonSedentary	32.98	Obese
1064	Chennai	South	Female	30	NonSedentary	32.46	Obese
1083	Chennai	South	Male	30	NonSedentary	32.88	Obese
2007	Ahmedabad	West	Male	30	NonSedentary	28.58	Non-Obese
2011	Ahmedabad	West	Male	30	NonSedentary	28.31	Non-Obese
2027	Ahmedabad	West	Female	30	NonSedentary	25.91	Non-Obese
2032	Ahmedabad	West	Male	30	NonSedentary	21.83	Non-Obese
2034	Ahmedabad	West	Male	30	Sedentary	23.05	Non-Obese
2037	Ahmedabad	West	Male	30	Sedentary	31.11	Obese
5053	Bhopal	North	Female	30	Sedentary	31.21	Obese
6014	Mangalore	South	Female	30	NonSedentary	17.63	Non-Obese
6049	Mangalore	South	Male	30	Sedentary	30.10	Obese
6063	Mangalore	South	Male	30	Sedentary	26.84	Non-Obese
7041	Cochin	South	Male	30	Sedentary	22.12	Non-Obese
9006	Guwahati	East	Female	30	NonSedentary	20.54	Non-Obese
9015	Guwahati	East	Male	30	Sedentary	32.05	Obese
9063	Guwahati	East	Male	30	NonSedentary	31.30	Obese
9073	Guwahati	East	Male	30	NonSedentary	28.15	Non-Obese
10007	Ludhiana	North	Female	30	Sedentary	22.09	Non-Obese
10019	Ludhiana	North	Male	30	Sedentary	31.54	Obese
10021	Ludhiana	North	Female	30	Sedentary	31.02	Obese
10038	Ludhiana	North	Female	30	Sedentary	18.16	Non-Obese
10041	Ludhiana	North	Male	30	Sedentary	19.38	Non-Obese
10061	Ludhiana	North	Male	30	Sedentary	24.69	Non-Obese
11014	Lucknow	North	Male	30	Sedentary	24.62	Non-Obese
11021	Lucknow	North	Female	30	Sedentary	31.65	Obese
11061	Lucknow	North	Female	30	Sedentary	35.49	Obese
12021	Patna	East	Female	30	Sedentary	34.89	Obese
12065	Patna	East	Male	30	Sedentary	30.07	Obese
13015	NewDelhi	North	Female	30	Sedentary	32.46	Obese
13020	NewDelhi	North	Male	30	Sedentary	31.63	Obese
13039	NewDelhi	North	Male	30	Sedentary	30.81	Obese
14011	Kolkata	East	Female	30	NonSedentary	27.07	Non-Obese
14033	Kolkata	East	Female	30	Sedentary	33.31	Obese
14038	Kolkata	East	Male	30	NonSedentary	30.12	Obese
14050	Kolkata	East	Male	30	NonSedentary	33.06	Obese
1026	Chennai	South	Male	31	NonSedentary	25.13	Non-Obese
1034	Chennai	South	Male	31	NonSedentary	22.53	Non-Obese
1047	Chennai	South	Male	31	NonSedentary	31.46	Obese
1061	Chennai	South	Male	31	NonSedentary	30.48	Obese
1063	Chennai	South	Female	31	NonSedentary	36.79	Obese
1085	Chennai	South	Female	31	NonSedentary	30.22	Obese
1090	Chennai	South	Male	31	NonSedentary	30.35	Obese
2016	Ahmedabad	West	Male	31	NonSedentary	25.01	Non-Obese
2061	Ahmedabad	West	Female	31	Sedentary	32.05	Obese
3005	Nagpur	West	Male	31	NonSedentary	29.10	Non-Obese
3018	Nagpur	West	Male	31	NonSedentary	19.58	Non-Obese
3035	Nagpur	West	Male	31	NonSedentary	28.85	Non-Obese
3041	Nagpur	West	Male	31	NonSedentary	24.21	Non-Obese
6002	Mangalore	South	Female	31	NonSedentary	23.33	Non-Obese
6003	Mangalore	South	Female	31	NonSedentary	24.77	Non-Obese
6017	Mangalore	South	Male	31	NonSedentary	17.65	Non-Obese
6029	Mangalore	South	Male	31	NonSedentary	31.91	Obese
6064	Mangalore	South	Male	31	Sedentary	30.48	Obese
7055	Cochin	South	Male	31	NonSedentary	23.12	Non-Obese
10023	Ludhiana	North	Female	31	Sedentary	30.23	Obese
11002	Lucknow	North	Male	31	Sedentary	30.47	Obese
11023	Lucknow	North	Male	31	Sedentary	30.49	Obese
12056	Patna	East	Male	31	Sedentary	26.57	Non-Obese
14057	Kolkata	East	Male	31	NonSedentary	33.17	Obese
14072	Kolkata	East	Male	31	NonSedentary	27.26	Non-Obese
1025	Chennai	South	Male	32	NonSedentary	22.66	Non-Obese
1068	Chennai	South	Female	32	NonSedentary	35.18	Obese
1089	Chennai	South	Male	32	NonSedentary	27.55	Non-Obese
2010	Ahmedabad	West	Male	32	Sedentary	26.99	Non-Obese
2030	Ahmedabad	West	Female	32	Sedentary	24.89	Non-Obese
2033	Ahmedabad	West	Female	32	Sedentary	28.65	Non-Obese
2058	Ahmedabad	West	Male	32	Sedentary	32.85	Obese
3006	Nagpur	West	Female	32	NonSedentary	21.96	Non-Obese
3065	Nagpur	West	Male	32	Sedentary	26.39	Non-Obese
4048	Ajmer	West	Male	32	NonSedentary	32.82	Obese
5010	Bhopal	North	Male	32	Sedentary	25.85	Non-Obese
5012	Bhopal	North	Female	32	Sedentary	26.18	Non-Obese
5021	Bhopal	North	Female	32	Sedentary	25.42	Non-Obese
5026	Bhopal	North	Male	32	Sedentary	23.72	Non-Obese
5048	Bhopal	North	Female	32	NonSedentary	30.11	Obese
6006	Mangalore	South	Female	32	NonSedentary	20.08	Non-Obese
6023	Mangalore	South	Male	32	NonSedentary	20.70	Non-Obese
6031	Mangalore	South	Male	32	NonSedentary	19.69	Non-Obese
6033	Mangalore	South	Male	32	Sedentary	22.15	Non-Obese
7043	Cochin	South	Female	32	Sedentary	23.50	Non-Obese
7074	Cochin	South	Female	32	Sedentary	20.92	Non-Obese
8001	Mumbai	West	Female	32	NonSedentary	30.86	Obese
8043	Mumbai	West	Male	32	NonSedentary	23.38	Non-Obese
9066	Guwahati	East	Male	32	NonSedentary	28.76	Non-Obese
11005	Lucknow	North	Female	32	NonSedentary	31.25	Obese
11010	Lucknow	North	Male	32	Sedentary	22.41	Non-Obese
11020	Lucknow	North	Male	32	Sedentary	24.84	Non-Obese
11032	Lucknow	North	Male	32	NonSedentary	25.10	Non-Obese
12006	Patna	East	Female	32	Sedentary	29.00	Non-Obese
12026	Patna	East	Female	32	Sedentary	34.60	Obese
12030	Patna	East	Female	32	Sedentary	33.09	Obese
12054	Patna	East	Male	32	Sedentary	24.34	Non-Obese
13046	NewDelhi	North	Female	32	Sedentary	40.27	Obese
14029	Kolkata	East	Female	32	NonSedentary	34.24	Obese
14064	Kolkata	East	Male	32	NonSedentary	31.20	Obese
14075	Kolkata	East	Male	32	NonSedentary	31.59	Obese
2009	Ahmedabad	West	Male	33	NonSedentary	25.16	Non-Obese
2012	Ahmedabad	West	Male	33	Sedentary	25.28	Non-Obese
2014	Ahmedabad	West	Female	33	NonSedentary	22.52	Non-Obese
3021	Nagpur	West	Female	33	NonSedentary	18.97	Non-Obese
4018	Ajmer	West	Female	33	NonSedentary	32.03	Obese
6008	Mangalore	South	Female	33	NonSedentary	19.23	Non-Obese
6026	Mangalore	South	Male	33	NonSedentary	22.76	Non-Obese
6032	Mangalore	South	Male	33	NonSedentary	22.58	Non-Obese
6034	Mangalore	South	Male	33	NonSedentary	26.99	Non-Obese
6039	Mangalore	South	Male	33	NonSedentary	24.45	Non-Obese
6045	Mangalore	South	Male	33	Sedentary	30.85	Obese
6050	Mangalore	South	Male	33	Sedentary	30.11	Obese
7083	Cochin	South	Female	33	NonSedentary	26.78	Non-Obese
8030	Mumbai	West	Male	33	Sedentary	23.51	Non-Obese
9081	Guwahati	East	Male	33	NonSedentary	29.72	Non-Obese
10016	Ludhiana	North	Female	33	Sedentary	31.25	Obese
11026	Lucknow	North	Male	33	Sedentary	31.25	Obese
11064	Lucknow	North	Female	33	Sedentary	21.33	Non-Obese
11067	Lucknow	North	Male	33	Sedentary	31.64	Obese
12018	Patna	East	Female	33	Sedentary	31.22	Obese
13003	NewDelhi	North	Male	33	Sedentary	33.95	Obese
14020	Kolkata	East	Female	33	NonSedentary	31.69	Obese
14051	Kolkata	East	Female	33	NonSedentary	31.56	Obese
1001	Chennai	South	Male	34	NonSedentary	26.81	Non-Obese
1045	Chennai	South	Male	34	NonSedentary	25.54	Non-Obese
1065	Chennai	South	Male	34	NonSedentary	35.84	Obese
2003	Ahmedabad	West	Male	34	Sedentary	28.14	Non-Obese
2005	Ahmedabad	West	Male	34	NonSedentary	25.31	Non-Obese
3026	Nagpur	West	Female	34	NonSedentary	30.84	Obese
3029	Nagpur	West	Female	34	NonSedentary	33.43	Obese
3040	Nagpur	West	Male	34	NonSedentary	28.73	Non-Obese
3061	Nagpur	West	Female	34	Sedentary	24.11	Non-Obese
4019	Ajmer	West	Male	34	NonSedentary	23.18	Non-Obese
4030	Ajmer	West	Male	34	NonSedentary	20.69	Non-Obese
4031	Ajmer	West	Male	34	NonSedentary	25.74	Non-Obese
4034	Ajmer	West	Male	34	NonSedentary	22.94	Non-Obese
5028	Bhopal	North	Female	34	Sedentary	24.81	Non-Obese
5036	Bhopal	North	Male	34	Sedentary	29.07	Non-Obese
5040	Bhopal	North	Male	34	Sedentary	27.43	Non-Obese
5056	Bhopal	North	Male	34	Sedentary	30.48	Obese
7058	Cochin	South	Female	34	NonSedentary	31.89	Obese
7103	Cochin	South	Male	34	NonSedentary	28.39	Non-Obese
9016	Guwahati	East	Male	34	NonSedentary	30.44	Obese
9056	Guwahati	East	Male	34	NonSedentary	31.23	Obese
11004	Lucknow	North	Male	34	NonSedentary	30.12	Obese
11049	Lucknow	North	Male	34	Sedentary	31.16	Obese
12019	Patna	East	Male	34	Sedentary	33.46	Obese
12020	Patna	East	Male	34	Sedentary	34.89	Obese
12033	Patna	East	Male	34	Sedentary	31.60	Obese
12068	Patna	East	Female	34	Sedentary	32.24	Obese
14019	Kolkata	East	Female	34	NonSedentary	27.59	Non-Obese
14068	Kolkata	East	Male	34	NonSedentary	32.57	Obese
14081	Kolkata	East	Female	34	NonSedentary	32.89	Obese
1018	Chennai	South	Female	35	NonSedentary	30.48	Obese
1029	Chennai	South	Female	35	NonSedentary	23.03	Non-Obese
1031	Chennai	South	Female	35	NonSedentary	20.20	Non-Obese
2013	Ahmedabad	West	Female	35	NonSedentary	22.86	Non-Obese
3008	Nagpur	West	Male	35	NonSedentary	29.38	Non-Obese
3043	Nagpur	West	Female	35	Sedentary	23.76	Non-Obese
4023	Ajmer	West	Female	35	NonSedentary	23.44	Non-Obese
4026	Ajmer	West	Male	35	NonSedentary	21.97	Non-Obese
4043	Ajmer	West	Female	35	NonSedentary	32.24	Obese
4061	Ajmer	West	Male	35	NonSedentary	32.10	Obese
5003	Bhopal	North	Female	35	NonSedentary	24.45	Non-Obese
5034	Bhopal	North	Male	35	NonSedentary	25.31	Non-Obese
5054	Bhopal	North	Male	35	NonSedentary	27.44	Non-Obese
6018	Mangalore	South	Male	35	NonSedentary	23.12	Non-Obese
6037	Mangalore	South	Male	35	NonSedentary	29.07	Non-Obese
6052	Mangalore	South	Male	35	Sedentary	27.04	Non-Obese
7034	Cochin	South	Male	35	NonSedentary	22.72	Non-Obese
7097	Cochin	South	Male	35	NonSedentary	26.81	Non-Obese
8046	Mumbai	West	Male	35	Sedentary	41.60	Obese
8056	Mumbai	West	Female	35	Sedentary	30.63	Obese
9008	Guwahati	East	Male	35	Sedentary	34.45	Obese
9017	Guwahati	East	Female	35	Sedentary	33.59	Obese
9018	Guwahati	East	Female	35	Sedentary	34.89	Obese
9022	Guwahati	East	Male	35	NonSedentary	22.22	Non-Obese
9023	Guwahati	East	Male	35	Sedentary	31.11	Obese
9044	Guwahati	East	Male	35	NonSedentary	35.06	Obese
9046	Guwahati	East	Female	35	Sedentary	32.05	Obese
9076	Guwahati	East	Male	35	NonSedentary	31.11	Obese
9080	Guwahati	East	Male	35	NonSedentary	31.11	Obese
10012	Ludhiana	North	Female	35	Sedentary	14.84	Non-Obese
10030	Ludhiana	North	Female	35	Sedentary	21.22	Non-Obese
10036	Ludhiana	North	Male	35	Sedentary	27.61	Non-Obese
10042	Ludhiana	North	Male	35	Sedentary	41.28	Obese
11019	Lucknow	North	Male	35	Sedentary	35.14	Obese
11033	Lucknow	North	Male	35	Sedentary	29.41	Non-Obese
11037	Lucknow	North	Female	35	Sedentary	32.24	Obese
11043	Lucknow	North	Female	35	Sedentary	34.18	Obese
11050	Lucknow	North	Female	35	Sedentary	36.98	Obese
11066	Lucknow	North	Male	35	Sedentary	35.69	Obese
12015	Patna	East	Male	35	Sedentary	26.84	Non-Obese
12023	Patna	East	Male	35	Sedentary	27.04	Non-Obese
12031	Patna	East	Male	35	Sedentary	27.68	Non-Obese
12041	Patna	East	Male	35	Sedentary	35.27	Obese
12049	Patna	East	Male	35	Sedentary	32.28	Obese
13009	NewDelhi	North	Female	35	Sedentary	30.86	Obese
13043	NewDelhi	North	Female	35	Sedentary	28.58	Non-Obese
14034	Kolkata	East	Male	35	NonSedentary	26.71	Non-Obese
14049	Kolkata	East	Male	35	NonSedentary	33.09	Obese
14074	Kolkata	East	Male	35	NonSedentary	31.18	Obese
1052	Chennai	South	Female	36	NonSedentary	30.39	Obese
2021	Ahmedabad	West	Male	36	NonSedentary	24.68	Non-Obese
2025	Ahmedabad	West	Female	36	NonSedentary	25.91	Non-Obese
2035	Ahmedabad	West	Male	36	NonSedentary	24.80	Non-Obese
2038	Ahmedabad	West	Male	36	Sedentary	31.24	Obese
2043	Ahmedabad	West	Female	36	Sedentary	23.44	Non-Obese
3028	Nagpur	West	Male	36	NonSedentary	27.65	Non-Obese
3044	Nagpur	West	Male	36	Sedentary	25.28	Non-Obese
3049	Nagpur	West	Male	36	Sedentary	30.45	Obese
3060	Nagpur	West	Female	36	Sedentary	25.03	Non-Obese
4032	Ajmer	West	Female	36	NonSedentary	28.19	Non-Obese
4036	Ajmer	West	Female	36	NonSedentary	18.20	Non-Obese
4047	Ajmer	West	Male	36	NonSedentary	31.18	Obese
4050	Ajmer	West	Male	36	NonSedentary	24.07	Non-Obese
5024	Bhopal	North	Female	36	NonSedentary	25.26	Non-Obese
5045	Bhopal	North	Male	36	Sedentary	30.18	Obese
5067	Bhopal	North	Male	36	Sedentary	27.31	Non-Obese
6020	Mangalore	South	Male	36	Sedentary	19.96	Non-Obese
6041	Mangalore	South	Male	36	NonSedentary	19.49	Non-Obese
6059	Mangalore	South	Male	36	Sedentary	25.40	Non-Obese
7059	Cochin	South	Male	36	NonSedentary	33.67	Obese
7081	Cochin	South	Male	36	Sedentary	23.44	Non-Obese
7085	Cochin	South	Male	36	Sedentary	33.71	Obese
7088	Cochin	South	Male	36	NonSedentary	30.69	Obese
8002	Mumbai	West	Male	36	Sedentary	33.30	Obese
10035	Ludhiana	North	Male	36	Sedentary	30.85	Obese
10048	Ludhiana	North	Male	36	Sedentary	32.69	Obese
11022	Lucknow	North	Male	36	Sedentary	21.05	Non-Obese
11046	Lucknow	North	Male	36	Sedentary	36.00	Obese
11056	Lucknow	North	Male	36	NonSedentary	33.95	Obese
11057	Lucknow	North	Female	36	NonSedentary	16.94	Non-Obese
11060	Lucknow	North	Male	36	Sedentary	33.75	Obese
12017	Patna	East	Male	36	Sedentary	33.63	Obese
12078	Patna	East	Female	36	Sedentary	30.47	Obese
13005	NewDelhi	North	Female	36	Sedentary	30.08	Obese
14009	Kolkata	East	Male	36	NonSedentary	19.03	Non-Obese
14062	Kolkata	East	Female	36	NonSedentary	34.18	Obese
14070	Kolkata	East	Female	36	NonSedentary	33.53	Obese
1030	Chennai	South	Male	37	NonSedentary	20.98	Non-Obese
3015	Nagpur	West	Female	37	NonSedentary	30.47	Obese
4003	Ajmer	West	Male	37	NonSedentary	27.82	Non-Obese
4005	Ajmer	West	Female	37	NonSedentary	23.31	Non-Obese
5037	Bhopal	North	Male	37	Sedentary	30.85	Obese
6043	Mangalore	South	Female	37	Sedentary	21.37	Non-Obese
7004	Cochin	South	Male	37	Sedentary	31.22	Obese
7040	Cochin	South	Male	37	NonSedentary	26.30	Non-Obese
7062	Cochin	South	Male	37	Sedentary	33.20	Obese
7092	Cochin	South	Male	37	NonSedentary	28.04	Non-Obese
9055	Guwahati	East	Male	37	NonSedentary	32.05	Obese
9071	Guwahati	East	Female	37	NonSedentary	29.40	Non-Obese
10002	Ludhiana	North	Male	37	Sedentary	36.88	Obese
10009	Ludhiana	North	Male	37	Sedentary	21.77	Non-Obese
11001	Lucknow	North	Male	37	Sedentary	27.34	Non-Obese
11044	Lucknow	North	Male	37	NonSedentary	33.27	Obese
12010	Patna	East	Female	37	Sedentary	25.78	Non-Obese
13030	NewDelhi	North	Female	37	Sedentary	32.46	Obese
14006	Kolkata	East	Female	37	NonSedentary	25.91	Non-Obese
14042	Kolkata	East	Male	37	NonSedentary	22.88	Non-Obese
14067	Kolkata	East	Female	37	NonSedentary	33.36	Obese
14073	Kolkata	East	Female	37	NonSedentary	24.78	Non-Obese
1014	Chennai	South	Female	38	NonSedentary	30.08	Obese
1079	Chennai	South	Female	38	NonSedentary	30.47	Obese
2026	Ahmedabad	West	Male	38	NonSedentary	24.80	Non-Obese
2031	Ahmedabad	West	Female	38	Sedentary	27.05	Non-Obese
2042	Ahmedabad	West	Male	38	Sedentary	29.71	Non-Obese
3053	Nagpur	West	Male	38	Sedentary	30.57	Obese
3062	Nagpur	West	Female	38	Sedentary	21.80	Non-Obese
3066	Nagpur	West	Male	38	Sedentary	30.41	Obese
5007	Bhopal	North	Female	38	NonSedentary	24.74	Non-Obese
5035	Bhopal	North	Female	38	NonSedentary	27.69	Non-Obese
5064	Bhopal	North	Female	38	Sedentary	31.64	Obese
6001	Mangalore	South	Female	38	NonSedentary	26.62	Non-Obese
7073	Cochin	South	Male	38	NonSedentary	29.75	Non-Obese
9049	Guwahati	East	Male	38	Sedentary	31.99	Obese
9065	Guwahati	East	Male	38	Sedentary	28.15	Non-Obese
9077	Guwahati	East	Male	38	Sedentary	32.34	Obese
10034	Ludhiana	North	Male	38	NonSedentary	30.64	Obese
10047	Ludhiana	North	Male	38	Sedentary	31.22	Obese
10058	Ludhiana	North	Male	38	Sedentary	24.62	Non-Obese
11012	Lucknow	North	Male	38	Sedentary	28.65	Non-Obese
11024	Lucknow	North	Male	38	Sedentary	31.12	Obese
11031	Lucknow	North	Male	38	Sedentary	36.63	Obese
11063	Lucknow	North	Male	38	NonSedentary	33.62	Obese
12004	Patna	East	Female	38	Sedentary	25.39	Non-Obese
12016	Patna	East	Male	38	Sedentary	27.28	Non-Obese
12029	Patna	East	Female	38	Sedentary	30.48	Obese
12053	Patna	East	Female	38	Sedentary	30.86	Obese
14032	Kolkata	East	Female	38	NonSedentary	20.26	Non-Obese
14061	Kolkata	East	Female	38	NonSedentary	28.44	Non-Obese
14080	Kolkata	East	Male	38	NonSedentary	31.68	Obese
1022	Chennai	South	Female	39	NonSedentary	23.19	Non-Obese
1028	Chennai	South	Male	39	NonSedentary	23.62	Non-Obese
3038	Nagpur	West	Female	39	Sedentary	26.21	Non-Obese
4051	Ajmer	West	Male	39	NonSedentary	23.66	Non-Obese
4062	Ajmer	West	Female	39	NonSedentary	21.88	Non-Obese
4065	Ajmer	West	Male	39	NonSedentary	19.59	Non-Obese
5050	Bhopal	North	Male	39	NonSedentary	25.91	Non-Obese
6011	Mangalore	South	Male	39	NonSedentary	24.45	Non-Obese
7065	Cochin	South	Male	39	Sedentary	29.07	Non-Obese
8034	Mumbai	West	Female	39	Sedentary	31.90	Obese
8048	Mumbai	West	Female	39	NonSedentary	21.78	Non-Obese
10005	Ludhiana	North	Male	39	Sedentary	23.38	Non-Obese
10049	Ludhiana	North	Male	39	NonSedentary	31.62	Obese
10067	Ludhiana	North	Male	39	Sedentary	31.49	Obese
11058	Lucknow	North	Female	39	Sedentary	28.48	Non-Obese
12009	Patna	East	Male	39	Sedentary	26.99	Non-Obese
12066	Patna	East	Female	39	Sedentary	30.08	Obese
14017	Kolkata	East	Male	39	NonSedentary	36.98	Obese
14024	Kolkata	East	Male	39	NonSedentary	23.11	Non-Obese
14027	Kolkata	East	Female	39	NonSedentary	31.18	Obese
14046	Kolkata	East	Male	39	NonSedentary	31.37	Obese
14083	Kolkata	East	Female	39	NonSedentary	36.89	Obese
1088	Chennai	South	Male	40	NonSedentary	29.75	Non-Obese
2024	Ahmedabad	West	Male	40	NonSedentary	25.76	Non-Obese
2047	Ahmedabad	West	Male	40	NonSedentary	31.24	Obese
3052	Nagpur	West	Male	40	Sedentary	30.30	Obese
4009	Ajmer	West	Male	40	NonSedentary	32.87	Obese
4022	Ajmer	West	Male	40	NonSedentary	31.82	Obese
4069	Ajmer	West	Female	40	NonSedentary	33.46	Obese
5013	Bhopal	North	Male	40	NonSedentary	27.41	Non-Obese
5015	Bhopal	North	Female	40	Sedentary	24.80	Non-Obese
5025	Bhopal	North	Male	40	Sedentary	25.84	Non-Obese
6051	Mangalore	South	Male	40	Sedentary	39.74	Obese
6058	Mangalore	South	Male	40	Sedentary	27.41	Non-Obese
7026	Cochin	South	Male	40	NonSedentary	28.06	Non-Obese
7027	Cochin	South	Female	40	NonSedentary	32.47	Obese
7086	Cochin	South	Female	40	Sedentary	30.82	Obese
8023	Mumbai	West	Female	40	Sedentary	30.22	Obese
8055	Mumbai	West	Male	40	Sedentary	31.24	Obese
9019	Guwahati	East	Male	40	NonSedentary	36.03	Obese
9024	Guwahati	East	Female	40	Sedentary	19.53	Non-Obese
9025	Guwahati	East	Female	40	Sedentary	26.89	Non-Obese
9026	Guwahati	East	Female	40	Sedentary	29.67	Non-Obese
9042	Guwahati	East	Male	40	NonSedentary	32.83	Obese
9045	Guwahati	East	Female	40	Sedentary	33.27	Obese
9048	Guwahati	East	Female	40	NonSedentary	31.11	Obese
9050	Guwahati	East	Female	40	NonSedentary	30.63	Obese
9068	Guwahati	East	Female	40	NonSedentary	28.98	Non-Obese
9078	Guwahati	East	Male	40	NonSedentary	31.11	Obese
9082	Guwahati	East	Male	40	NonSedentary	31.77	Obese
10015	Ludhiana	North	Female	40	Sedentary	32.81	Obese
10017	Ludhiana	North	Female	40	Sedentary	31.25	Obese
10031	Ludhiana	North	Male	40	Sedentary	25.31	Non-Obese
10057	Ludhiana	North	Male	40	Sedentary	32.32	Obese
10063	Ludhiana	North	Female	40	Sedentary	34.71	Obese
11052	Lucknow	North	Male	40	Sedentary	31.64	Obese
12011	Patna	East	Female	40	Sedentary	26.72	Non-Obese
12012	Patna	East	Male	40	Sedentary	27.85	Non-Obese
12025	Patna	East	Male	40	Sedentary	31.14	Obese
12034	Patna	East	Male	40	Sedentary	31.20	Obese
12048	Patna	East	Male	40	Sedentary	30.49	Obese
12050	Patna	East	Female	40	Sedentary	30.11	Obese
12055	Patna	East	Male	40	Sedentary	31.51	Obese
12082	Patna	East	Male	40	Sedentary	30.37	Obese
13017	NewDelhi	North	Female	40	Sedentary	26.20	Non-Obese
13018	NewDelhi	North	Female	40	Sedentary	27.45	Non-Obese
13034	NewDelhi	North	Male	40	Sedentary	33.06	Obese
14016	Kolkata	East	Male	40	NonSedentary	22.39	Non-Obese
14030	Kolkata	East	Male	40	NonSedentary	23.59	Non-Obese
14035	Kolkata	East	Female	40	NonSedentary	23.02	Non-Obese
1019	Chennai	South	Male	41	NonSedentary	25.42	Non-Obese
2065	Ahmedabad	West	Male	41	NonSedentary	31.14	Obese
4063	Ajmer	West	Female	41	NonSedentary	25.81	Non-Obese
5008	Bhopal	North	Female	41	NonSedentary	25.61	Non-Obese
5039	Bhopal	North	Female	41	NonSedentary	30.49	Obese
6025	Mangalore	South	Male	41	NonSedentary	27.73	Non-Obese
6030	Mangalore	South	Male	41	NonSedentary	26.30	Non-Obese
6046	Mangalore	South	Male	41	Sedentary	35.20	Obese
7093	Cochin	South	Female	41	Sedentary	31.43	Obese
8041	Mumbai	West	Female	41	NonSedentary	31.69	Obese
8045	Mumbai	West	Male	41	Sedentary	28.94	Non-Obese
10050	Ludhiana	North	Male	41	Sedentary	25.34	Non-Obese
11034	Lucknow	North	Male	41	Sedentary	32.88	Obese
11038	Lucknow	North	Male	41	Sedentary	31.25	Obese
12036	Patna	East	Male	41	Sedentary	34.38	Obese
12061	Patna	East	Female	41	Sedentary	30.48	Obese
12074	Patna	East	Male	41	Sedentary	31.38	Obese
13031	NewDelhi	North	Female	41	NonSedentary	20.11	Non-Obese
13032	NewDelhi	North	Male	41	NonSedentary	20.11	Non-Obese
14002	Kolkata	East	Male	41	NonSedentary	32.46	Obese
14056	Kolkata	East	Female	41	NonSedentary	28.13	Non-Obese
14076	Kolkata	East	Female	41	NonSedentary	32.15	Obese
1012	Chennai	South	Female	42	NonSedentary	30.13	Obese
1013	Chennai	South	Male	42	NonSedentary	20.43	Non-Obese
1023	Chennai	South	Male	42	NonSedentary	31.24	Obese
2066	Ahmedabad	West	Female	42	NonSedentary	25.40	Non-Obese
3042	Nagpur	West	Male	42	Sedentary	26.96	Non-Obese
4008	Ajmer	West	Female	42	NonSedentary	25.78	Non-Obese
4033	Ajmer	West	Male	42	NonSedentary	23.61	Non-Obese
4039	Ajmer	West	Male	42	NonSedentary	25.74	Non-Obese
4042	Ajmer	West	Male	42	NonSedentary	31.14	Obese
4066	Ajmer	West	Male	42	NonSedentary	33.91	Obese
5047	Bhopal	North	Female	42	NonSedentary	25.06	Non-Obese
5055	Bhopal	North	Female	42	NonSedentary	30.00	Non-Obese
6016	Mangalore	South	Female	42	NonSedentary	24.17	Non-Obese
6042	Mangalore	South	Female	42	Sedentary	26.70	Non-Obese
7082	Cochin	South	Female	42	NonSedentary	33.30	Obese
7094	Cochin	South	Female	42	Sedentary	28.40	Non-Obese
8025	Mumbai	West	Female	42	Sedentary	30.44	Obese
8037	Mumbai	West	Female	42	Sedentary	30.36	Obese
8058	Mumbai	West	Male	42	Sedentary	31.83	Obese
9043	Guwahati	East	Male	42	NonSedentary	34.29	Obese
11028	Lucknow	North	Female	42	Sedentary	38.81	Obese
11051	Lucknow	North	Male	42	NonSedentary	23.15	Non-Obese
12043	Patna	East	Female	42	Sedentary	27.47	Non-Obese
12060	Patna	East	Male	42	Sedentary	31.48	Obese
13022	NewDelhi	North	Male	42	Sedentary	28.15	Non-Obese
14028	Kolkata	East	Male	42	NonSedentary	30.47	Obese
14084	Kolkata	East	Male	42	NonSedentary	28.93	Non-Obese
1060	Chennai	South	Female	43	NonSedentary	39.56	Obese
3016	Nagpur	West	Male	43	Sedentary	18.34	Non-Obese
3031	Nagpur	West	Male	43	NonSedentary	30.45	Obese
3051	Nagpur	West	Female	43	Sedentary	32.51	Obese
3054	Nagpur	West	Male	43	Sedentary	26.34	Non-Obese
4056	Ajmer	West	Female	43	NonSedentary	25.15	Non-Obese
5002	Bhopal	North	Male	43	NonSedentary	25.80	Non-Obese
6038	Mangalore	South	Male	43	NonSedentary	20.80	Non-Obese
7046	Cochin	South	Male	43	NonSedentary	30.30	Obese
7079	Cochin	South	Male	43	NonSedentary	33.12	Obese
7107	Cochin	South	Female	43	Sedentary	31.59	Obese
10004	Ludhiana	North	Female	43	Sedentary	33.86	Obese
13021	NewDelhi	North	Male	43	NonSedentary	26.22	Non-Obese
14040	Kolkata	East	Female	43	NonSedentary	30.17	Obese
14044	Kolkata	East	Male	43	NonSedentary	31.08	Obese
1020	Chennai	South	Female	44	NonSedentary	31.16	Obese
4035	Ajmer	West	Male	44	NonSedentary	24.87	Non-Obese
4044	Ajmer	West	Female	44	NonSedentary	33.53	Obese
8005	Mumbai	West	Female	44	NonSedentary	20.78	Non-Obese
9083	Guwahati	East	Female	44	NonSedentary	36.03	Obese
12022	Patna	East	Female	44	Sedentary	27.34	Non-Obese
12044	Patna	East	Male	44	Sedentary	30.07	Obese
12052	Patna	East	Female	44	Sedentary	32.87	Obese
14001	Kolkata	East	Female	44	NonSedentary	28.51	Non-Obese
3014	Nagpur	West	Male	45	NonSedentary	24.62	Non-Obese
3027	Nagpur	West	Male	45	NonSedentary	35.01	Obese
3036	Nagpur	West	Male	45	Sedentary	26.49	Non-Obese
4006	Ajmer	West	Male	45	Sedentary	33.83	Obese
4010	Ajmer	West	Male	45	NonSedentary	34.21	Obese
4015	Ajmer	West	Male	45	NonSedentary	32.11	Obese
4064	Ajmer	West	Female	45	NonSedentary	34.77	Obese
5006	Bhopal	North	Male	45	NonSedentary	24.68	Non-Obese
5065	Bhopal	North	Female	45	Sedentary	30.09	Obese
5066	Bhopal	North	Male	45	NonSedentary	26.96	Non-Obese
6024	Mangalore	South	Male	45	NonSedentary	21.43	Non-Obese
6036	Mangalore	South	Male	45	NonSedentary	21.78	Non-Obese
7030	Cochin	South	Female	45	Sedentary	21.18	Non-Obese
7102	Cochin	South	Male	45	NonSedentary	26.49	Non-Obese
10011	Ludhiana	North	Female	45	Sedentary	24.21	Non-Obese
10025	Ludhiana	North	Female	45	Sedentary	28.00	Non-Obese
11018	Lucknow	North	Female	45	NonSedentary	32.05	Obese
12002	Patna	East	Male	45	Sedentary	28.37	Non-Obese
13016	NewDelhi	North	Male	45	NonSedentary	26.69	Non-Obese
14018	Kolkata	East	Male	45	NonSedentary	31.25	Obese
14053	Kolkata	East	Female	45	NonSedentary	32.17	Obese
14059	Kolkata	East	Male	45	NonSedentary	32.60	Obese
14060	Kolkata	East	Male	45	NonSedentary	26.68	Non-Obese
4028	Ajmer	West	Female	46	NonSedentary	24.98	Non-Obese
4049	Ajmer	West	Male	46	NonSedentary	31.89	Obese
5014	Bhopal	North	Female	46	Sedentary	25.31	Non-Obese
5060	Bhopal	North	Female	46	NonSedentary	30.39	Obese
8022	Mumbai	West	Female	46	Sedentary	30.80	Obese
8049	Mumbai	West	Female	46	Sedentary	31.63	Obese
9036	Guwahati	East	Female	46	Sedentary	32.95	Obese
9037	Guwahati	East	Male	46	NonSedentary	37.72	Obese
14041	Kolkata	East	Male	46	NonSedentary	20.19	Non-Obese
1056	Chennai	South	Female	47	NonSedentary	31.25	Obese
1080	Chennai	South	Male	47	NonSedentary	30.11	Obese
5017	Bhopal	North	Male	47	Sedentary	25.06	Non-Obese
6021	Mangalore	South	Male	47	Sedentary	24.22	Non-Obese
7006	Cochin	South	Female	47	Sedentary	26.12	Non-Obese
7091	Cochin	South	Female	47	NonSedentary	31.04	Obese
8035	Mumbai	West	Female	47	Sedentary	25.30	Non-Obese
8047	Mumbai	West	Male	47	NonSedentary	21.45	Non-Obese
11035	Lucknow	North	Male	47	NonSedentary	26.30	Non-Obese
11062	Lucknow	North	Male	47	Sedentary	31.18	Obese
12058	Patna	East	Male	47	Sedentary	24.62	Non-Obese
1021	Chennai	South	Male	48	NonSedentary	24.52	Non-Obese
1037	Chennai	South	Female	48	NonSedentary	26.84	Non-Obese
2029	Ahmedabad	West	Male	48	NonSedentary	29.76	Non-Obese
4024	Ajmer	West	Male	48	NonSedentary	33.22	Obese
4027	Ajmer	West	Female	48	NonSedentary	23.95	Non-Obese
4052	Ajmer	West	Male	48	NonSedentary	22.20	Non-Obese
4070	Ajmer	West	Male	48	NonSedentary	22.49	Non-Obese
6027	Mangalore	South	Male	48	NonSedentary	17.71	Non-Obese
7024	Cochin	South	Male	48	NonSedentary	24.11	Non-Obese
7063	Cochin	South	Female	48	Sedentary	29.37	Non-Obese
7089	Cochin	South	Male	48	NonSedentary	34.95	Obese
8011	Mumbai	West	Female	48	Sedentary	31.74	Obese
8057	Mumbai	West	Female	48	Sedentary	31.22	Obese
9034	Guwahati	East	Male	48	Sedentary	31.77	Obese
9075	Guwahati	East	Female	48	Sedentary	16.11	Non-Obese
9079	Guwahati	East	Female	48	Sedentary	31.04	Obese
10033	Ludhiana	North	Female	48	Sedentary	24.59	Non-Obese
10040	Ludhiana	North	Female	48	Sedentary	31.00	Obese
11047	Lucknow	North	Female	48	Sedentary	28.19	Non-Obese
12005	Patna	East	Male	48	Sedentary	26.30	Non-Obese
12032	Patna	East	Male	48	Sedentary	34.58	Obese
12051	Patna	East	Female	48	Sedentary	27.34	Non-Obese
12072	Patna	East	Male	48	Sedentary	26.03	Non-Obese
1006	Chennai	South	Female	49	NonSedentary	27.06	Non-Obese
4038	Ajmer	West	Male	49	NonSedentary	27.93	Non-Obese
4046	Ajmer	West	Female	49	NonSedentary	32.85	Obese
4055	Ajmer	West	Male	49	NonSedentary	22.99	Non-Obese
4057	Ajmer	West	Female	49	NonSedentary	36.33	Obese
4059	Ajmer	West	Female	49	NonSedentary	36.63	Obese
4067	Ajmer	West	Male	49	NonSedentary	22.86	Non-Obese
6040	Mangalore	South	Male	49	NonSedentary	23.24	Non-Obese
7044	Cochin	South	Male	49	NonSedentary	24.98	Non-Obese
7045	Cochin	South	Male	49	NonSedentary	34.87	Obese
10044	Ludhiana	North	Female	49	Sedentary	31.00	Obese
10066	Ludhiana	North	Male	49	Sedentary	16.16	Non-Obese
11055	Lucknow	North	Female	49	Sedentary	34.72	Obese
12064	Patna	East	Male	49	Sedentary	27.22	Non-Obese
12067	Patna	East	Male	49	Sedentary	25.10	Non-Obese
13041	NewDelhi	North	Male	49	NonSedentary	31.22	Obese
14021	Kolkata	East	Female	49	NonSedentary	37.59	Obese
14045	Kolkata	East	Female	49	NonSedentary	32.98	Obese
2023	Ahmedabad	West	Male	50	NonSedentary	27.72	Non-Obese
4004	Ajmer	West	Female	50	Sedentary	35.00	Obese
4040	Ajmer	West	Male	50	NonSedentary	34.48	Obese
4053	Ajmer	West	Female	50	NonSedentary	34.96	Obese
5031	Bhopal	North	Female	50	Sedentary	25.14	Non-Obese
7087	Cochin	South	Male	50	NonSedentary	38.42	Obese
8009	Mumbai	West	Female	50	Sedentary	25.44	Non-Obese
10010	Ludhiana	North	Female	50	Sedentary	30.81	Obese
10014	Ludhiana	North	Male	50	Sedentary	24.21	Non-Obese
12038	Patna	East	Female	50	Sedentary	35.69	Obese
12063	Patna	East	Male	50	Sedentary	30.04	Obese
13011	NewDelhi	North	Female	50	NonSedentary	23.97	Non-Obese
13028	NewDelhi	North	Female	50	Sedentary	26.37	Non-Obese
14012	Kolkata	East	Male	50	NonSedentary	27.55	Non-Obese
14022	Kolkata	East	Female	50	NonSedentary	31.16	Obese
1058	Chennai	South	Female	51	NonSedentary	32.05	Obese
7031	Cochin	South	Male	51	NonSedentary	24.13	Non-Obese
7039	Cochin	South	Female	51	NonSedentary	19.90	Non-Obese
7050	Cochin	South	Female	51	NonSedentary	34.93	Obese
7078	Cochin	South	Male	51	NonSedentary	24.62	Non-Obese
7095	Cochin	South	Male	51	NonSedentary	22.09	Non-Obese
8053	Mumbai	West	Male	51	Sedentary	30.47	Obese
14052	Kolkata	East	Female	51	NonSedentary	30.57	Obese
6062	Mangalore	South	Male	52	Sedentary	34.29	Obese
7007	Cochin	South	Female	52	Sedentary	23.42	Non-Obese
9028	Guwahati	East	Male	52	Sedentary	29.72	Non-Obese
9033	Guwahati	East	Female	52	NonSedentary	36.03	Obese
9035	Guwahati	East	Male	52	Sedentary	39.84	Obese
12028	Patna	East	Male	52	Sedentary	32.15	Obese
12040	Patna	East	Female	52	Sedentary	36.36	Obese
12076	Patna	East	Male	52	Sedentary	30.07	Obese
14071	Kolkata	East	Female	52	Sedentary	35.79	Obese
4054	Ajmer	West	Male	53	NonSedentary	31.14	Obese
6009	Mangalore	South	Female	53	NonSedentary	24.13	Non-Obese
7009	Cochin	South	Female	53	Sedentary	19.74	Non-Obese
7025	Cochin	South	Female	53	NonSedentary	30.83	Obese
7053	Cochin	South	Male	53	NonSedentary	35.08	Obese
7068	Cochin	South	Female	53	NonSedentary	31.58	Obese
11003	Lucknow	North	Male	53	Sedentary	31.22	Obese
12046	Patna	East	Male	53	Sedentary	33.46	Obese
14065	Kolkata	East	Male	53	Sedentary	34.09	Obese
1003	Chennai	South	Female	54	NonSedentary	32.00	Obese
1055	Chennai	South	Male	54	NonSedentary	31.10	Obese
5011	Bhopal	North	Female	54	Sedentary	25.51	Non-Obese
7032	Cochin	South	Male	54	NonSedentary	25.98	Non-Obese
7067	Cochin	South	Male	54	NonSedentary	30.52	Obese
8006	Mumbai	West	Male	54	NonSedentary	19.14	Non-Obese
10060	Ludhiana	North	Female	54	Sedentary	30.49	Obese
12024	Patna	East	Male	54	Sedentary	33.63	Obese
12039	Patna	East	Male	54	Sedentary	30.10	Obese
1062	Chennai	South	Female	55	Sedentary	30.76	Obese
3007	Nagpur	West	Female	55	NonSedentary	18.57	Non-Obese
4013	Ajmer	West	Female	55	NonSedentary	28.13	Non-Obese
4060	Ajmer	West	Male	55	NonSedentary	31.35	Obese
5041	Bhopal	North	Male	55	Sedentary	27.38	Non-Obese
6028	Mangalore	South	Male	55	NonSedentary	22.28	Non-Obese
7001	Cochin	South	Female	55	Sedentary	26.11	Non-Obese
7033	Cochin	South	Male	55	NonSedentary	26.33	Non-Obese
7049	Cochin	South	Male	55	NonSedentary	38.97	Obese
7052	Cochin	South	Female	55	NonSedentary	21.30	Non-Obese
7064	Cochin	South	Male	55	NonSedentary	30.78	Obese
7101	Cochin	South	Male	55	NonSedentary	26.40	Non-Obese
8016	Mumbai	West	Male	55	Sedentary	31.22	Obese
9029	Guwahati	East	Female	55	Sedentary	33.95	Obese
10022	Ludhiana	North	Male	55	Sedentary	21.48	Non-Obese
10027	Ludhiana	North	Female	55	Sedentary	24.62	Non-Obese
11015	Lucknow	North	Female	55	Sedentary	36.05	Obese
11027	Lucknow	North	Female	55	Sedentary	25.20	Non-Obese
12081	Patna	East	Female	55	Sedentary	30.47	Obese
14007	Kolkata	East	Female	55	NonSedentary	30.82	Obese
14023	Kolkata	East	Female	55	NonSedentary	34.67	Obese
1016	Chennai	South	Female	56	NonSedentary	32.46	Obese
2064	Ahmedabad	West	Male	56	Sedentary	29.05	Non-Obese
5016	Bhopal	North	Male	56	Sedentary	26.26	Non-Obese
5029	Bhopal	North	Male	56	Sedentary	26.15	Non-Obese
7016	Cochin	South	Female	56	Sedentary	23.83	Non-Obese
7038	Cochin	South	Male	56	Sedentary	18.14	Non-Obese
8036	Mumbai	West	Male	56	NonSedentary	30.85	Obese
10062	Ludhiana	North	Female	56	Sedentary	38.54	Obese
13029	NewDelhi	North	Female	56	Sedentary	31.22	Obese
14003	Kolkata	East	Female	56	NonSedentary	27.06	Non-Obese
14008	Kolkata	East	Male	56	NonSedentary	21.85	Non-Obese
14010	Kolkata	East	Female	56	NonSedentary	16.23	Non-Obese
14058	Kolkata	East	Male	56	NonSedentary	22.30	Non-Obese
6022	Mangalore	South	Female	57	NonSedentary	30.67	Obese
7003	Cochin	South	Female	57	Sedentary	29.43	Non-Obese
7036	Cochin	South	Female	57	NonSedentary	20.89	Non-Obese
7084	Cochin	South	Male	57	Sedentary	34.29	Obese
8012	Mumbai	West	Male	57	NonSedentary	30.82	Obese
8026	Mumbai	West	Male	57	NonSedentary	31.74	Obese
10028	Ludhiana	North	Male	57	Sedentary	30.62	Obese
11041	Lucknow	North	Female	57	NonSedentary	24.65	Non-Obese
14005	Kolkata	East	Female	57	NonSedentary	25.39	Non-Obese
1009	Chennai	South	Male	58	NonSedentary	29.98	Non-Obese
1049	Chennai	South	Female	58	Sedentary	35.65	Obese
1053	Chennai	South	Male	58	NonSedentary	32.83	Obese
4012	Ajmer	West	Male	58	NonSedentary	26.14	Non-Obese
4058	Ajmer	West	Female	58	NonSedentary	23.03	Non-Obese
5043	Bhopal	North	Male	58	NonSedentary	30.78	Obese
7008	Cochin	South	Male	58	Sedentary	20.24	Non-Obese
7019	Cochin	South	Female	58	NonSedentary	25.81	Non-Obese
7035	Cochin	South	Male	58	Sedentary	22.79	Non-Obese
7037	Cochin	South	Male	58	NonSedentary	20.99	Non-Obese
7071	Cochin	South	Female	58	NonSedentary	27.34	Non-Obese
7075	Cochin	South	Female	58	Sedentary	20.03	Non-Obese
7090	Cochin	South	Male	58	NonSedentary	34.26	Obese
8027	Mumbai	West	Female	58	Sedentary	30.30	Obese
9021	Guwahati	East	Male	58	Sedentary	34.05	Obese
9031	Guwahati	East	Male	58	Sedentary	29.72	Non-Obese
10053	Ludhiana	North	Male	58	Sedentary	24.09	Non-Obese
11011	Lucknow	North	Female	58	Sedentary	25.11	Non-Obese
11025	Lucknow	North	Male	58	Sedentary	34.13	Obese
12035	Patna	East	Male	58	Sedentary	32.27	Obese
14063	Kolkata	East	Female	58	NonSedentary	30.08	Obese
14069	Kolkata	East	Male	58	NonSedentary	30.09	Obese
1042	Chennai	South	Male	59	NonSedentary	27.61	Non-Obese
7017	Cochin	South	Female	59	Sedentary	23.87	Non-Obese
7051	Cochin	South	Female	59	NonSedentary	24.97	Non-Obese
7054	Cochin	South	Female	59	NonSedentary	32.47	Obese
7077	Cochin	South	Female	59	Sedentary	27.19	Non-Obese
11006	Lucknow	North	Female	59	Sedentary	26.48	Non-Obese
13008	NewDelhi	North	Female	59	Sedentary	33.05	Obese
14015	Kolkata	East	Female	59	NonSedentary	25.71	Non-Obese
1038	Chennai	South	Female	60	NonSedentary	22.86	Non-Obese
3013	Nagpur	West	Male	60	Sedentary	22.01	Non-Obese
3045	Nagpur	West	Female	60	Sedentary	26.26	Non-Obese
4007	Ajmer	West	Female	60	NonSedentary	27.41	Non-Obese
4041	Ajmer	West	Female	60	Sedentary	39.14	Obese
4045	Ajmer	West	Female	60	NonSedentary	21.05	Non-Obese
5022	Bhopal	North	Female	60	NonSedentary	28.69	Non-Obese
5059	Bhopal	North	Female	60	NonSedentary	33.13	Obese
7047	Cochin	South	Male	60	NonSedentary	29.30	Non-Obese
7056	Cochin	South	Male	60	NonSedentary	30.39	Obese
7069	Cochin	South	Female	60	NonSedentary	27.34	Non-Obese
8010	Mumbai	West	Male	60	Sedentary	30.11	Obese
9030	Guwahati	East	Male	60	Sedentary	34.05	Obese
9032	Guwahati	East	Male	60	Sedentary	36.05	Obese
9074	Guwahati	East	Male	60	Sedentary	35.09	Obese
10018	Ludhiana	North	Female	60	Sedentary	20.67	Non-Obese
10026	Ludhiana	North	Female	60	Sedentary	30.30	Obese
10039	Ludhiana	North	Male	60	Sedentary	30.64	Obese
10059	Ludhiana	North	Female	60	Sedentary	32.81	Obese
10064	Ludhiana	North	Female	60	Sedentary	32.46	Obese
11042	Lucknow	North	Male	60	Sedentary	25.57	Non-Obese
12083	Patna	East	Male	60	Sedentary	31.22	Obese
13012	NewDelhi	North	Male	60	NonSedentary	27.36	Non-Obese
13027	NewDelhi	North	Male	60	Sedentary	32.46	Obese
1050	Chennai	South	Female	61	Sedentary	34.22	Obese
7076	Cochin	South	Male	61	NonSedentary	24.24	Non-Obese
7080	Cochin	South	Male	61	NonSedentary	38.04	Obese
8003	Mumbai	West	Female	61	Sedentary	30.75	Obese
10001	Ludhiana	North	Male	61	NonSedentary	22.07	Non-Obese
10008	Ludhiana	North	Male	61	Sedentary	47.36	Obese
3009	Nagpur	West	Male	62	NonSedentary	33.02	Obese
4016	Ajmer	West	Female	62	NonSedentary	31.25	Obese
5023	Bhopal	North	Female	62	Sedentary	28.48	Non-Obese
8032	Mumbai	West	Female	62	Sedentary	25.63	Non-Obese
9062	Guwahati	East	Male	62	Sedentary	35.09	Obese
14004	Kolkata	East	Female	62	NonSedentary	20.89	Non-Obese
3037	Nagpur	West	Male	63	Sedentary	28.34	Non-Obese
3047	Nagpur	West	Male	63	Sedentary	30.45	Obese
4017	Ajmer	West	Male	63	NonSedentary	22.68	Non-Obese
5005	Bhopal	North	Male	63	Sedentary	25.31	Non-Obese
5062	Bhopal	North	Male	63	NonSedentary	26.37	Non-Obese
7048	Cochin	South	Male	63	NonSedentary	26.51	Non-Obese
7057	Cochin	South	Female	63	NonSedentary	34.63	Obese
11030	Lucknow	North	Female	63	Sedentary	41.09	Obese
13007	NewDelhi	North	Male	63	Sedentary	31.21	Obese
1002	Chennai	South	Male	64	NonSedentary	23.24	Non-Obese
3017	Nagpur	West	Male	64	NonSedentary	30.23	Obese
7066	Cochin	South	Male	64	NonSedentary	25.83	Non-Obese
7100	Cochin	South	Female	64	Sedentary	38.37	Obese
8029	Mumbai	West	Male	64	Sedentary	30.85	Obese
10055	Ludhiana	North	Male	64	Sedentary	23.39	Non-Obese
5044	Bhopal	North	Female	65	Sedentary	31.25	Obese
5051	Bhopal	North	Female	65	NonSedentary	30.49	Obese
7070	Cochin	South	Male	65	NonSedentary	23.94	Non-Obese
12037	Patna	East	Male	65	Sedentary	36.13	Obese
12042	Patna	East	Female	65	Sedentary	32.39	Obese
12057	Patna	East	Male	65	Sedentary	27.16	Non-Obese
14013	Kolkata	East	Male	65	NonSedentary	33.33	Obese
