# Supplementary material for: A Copula Type-Model for Examining the Role of Microbiome as a Potential Tool in Diagnosis
Source: Hindawi journal article supplement (doi:10.1155/2022/8033806), 2022-06-06
Supplement: f1 [file 8033806.f1.zip › 8033806.f1/Table_S1_ABbundance.txt]

	Taxonomic Path (Phylum_class_order_family_genus_species)	Subject ID
Grupos		1067	1090	2032	2065	3026	3061	4010	4027	5003	5028	5053	6025	6048	6056	7088	7095	8015	8040	9012	9037	9062	10018	10024	10028	10065	11017	11022	11042	12014	12039	12059	12064	12070	13011	13037	14006	14031	14054	14079	7068	3015	1039	1047	1069	2010	2064	3042	3024
	Firmicutes_Bacilli_Lactobacillales_Aerococcaceae_Abiotrophia_defectiva	0	0	0	0	0	0	0	0	0	0	0	0	0	0	0	0	0	0	0	0	0	0	0	0	0	0	0	0	0	0	0	0	0	0	0	0	0	0	0	0	0	0	0	0	0	0	0	0
	Firmicutes_Clostridia_Clostridiales_Ruminococcaceae_Acetanaerobacterium_elongatum	0	0	0	0	0	0	0	0	0	0	0	0	0	0	0	0	0	0	0	0	0	0	0	0	0	0	0	0	0	0	0	0	0	0	0	0	0	0	0	0	0	0	0	0	0	0	0	0
	Proteobacteria_Alphaproteobacteria_Rhodospirillales_Acetobacteraceae_Acetobacter_peroxydans	0	0	0	0	0	0	0	0	0	0	0	0	0	0	0	0	0	0	0	0	0	0	0	0	0	0	0	0	0	0	0	0	0	0	0	0	0	0	0	0.000328765	0	0	0	0	0	0	0	0
	Proteobacteria_Alphaproteobacteria_Rhodospirillales_Acetobacteraceae_Acetobacter_syzygii	0	0	0	0	0	0	0	0	0	0	0	0	0	0	0	0.002452383	0	0	0	0	0	0	0	0	0	0	0	0	0	0	0	0	0	0	0	0	0	0	0	0	0	0	0	0	0	0	0	0
	Proteobacteria_Alphaproteobacteria_Rhodospirillales_Acetobacteraceae_Acetobacter_tropicalis	0	0	0	0	0	0	0	0	0	0	0	0	0	0	0	0	0	0	0	0	0	0	0	0	0	0	0	0	0	0	0	0	0	0	0	0	0	0	0	0	0	0	0	0	0	0	0	0
	Tenericutes_Mollicutes_Acholeplasmatales_Acholeplasmataceae_Acholeplasma_laidlawii	0	0	0	0	0	0	0	0	0	0	0	0	0	0	0	0	0	0	0	0	0	0	0	0	0	0	0	0	0	0	0	0	0	0	0	0	0	0	0	0	0	0	0	0	0	0	0	0
	Tenericutes_Mollicutes_Acholeplasmatales_Acholeplasmataceae_Acholeplasma_modicum	0	0	0	0	0	0	0	0	0	0	0	0	0	0	0	0	0	0	0	0	0	0	0	0	0	0	0	0	0	0	0	0	0	0	0	0	0	0	0	0	0	0	0	0	0	0	0	0
	Firmicutes_Negativicutes_Acidaminococcales_Acidaminococcaceae_Acidaminococcus_fermentans	0	0	0	0	0	0	0	0	0	0.000218027	0	0	0	0	0	0	0	0	0	0	0	0	0	0	0	0	0	0	0	0	0	0	0	0	0	0	0	0	0	0	0	0.000359186	0	0	0	0	0	0
	Firmicutes_Negativicutes_Acidaminococcales_Acidaminococcaceae_Acidaminococcus_intestini	0	0.000402762	0	0	0	0	0	0	0	0	0	0.004905873	0.000423518	0.000339673	0	0	0	0	0	0	2.60E-05	0	0	0	0	0	0	0	0	0	0	0	0	0	0	0.000170136	0	0	0	0.000646193	0	0	0	0	0	0	0	0
	Proteobacteria_Gammaproteobacteria_Acidiferrobacterales_Acidiferrobacteraceae_Acidiferrobacter_thiooxydans	0	0	0	0	0	0	0	0	0	0	0	0	0	0	0	0	0	0	0	0	0	0	0	0	0	0	0	0	0	0	0	0	0	0	0	0	0	0	0	0	0	0	0	0	0	0	0	0
Cluster2	Proteobacteria_Alphaproteobacteria_Rhodospirillales_Acetobacteraceae_Acidiphilium_sp.	0.000998509	6.90E-05	0	0	0.000753756	0	0.082840688	0	0.000169385	0.000101408	0.000679485	0.000379521	0.000340475	0.003484641	0	0.000132837	0	0	0	0	0	0	0	0	0	0.0110547	0	0	7.68E-05	0	0	0	0	0.000249633	0	0.000108269	0	0.00166027	0	0	0	0	0	0	0.000430958	0	0	0
	Acidobacteria_Acidobacteria_Acidobacteriales_Acidobacteriaceae_Acidipila_rosea	0	0	0	0	0	0	0	0	0	0	0	0	0	0	0	0	0	0	0	0	0	0	0	0	0	0	0	0	0	0	0	0	0	0	0	0	0	0	0	0	0	0	0	0	0	0	0	0
	Proteobacteria_Alphaproteobacteria_Rhodospirillales_Acetobacteraceae_Acidisphaera_sp.	0	0	0	0	0	0	0.00044497	0	0	0	0	0	0	0	0	0	0	0	0	0	0	0	0	0	0	0	0	0	0	0	0	0	0	0	0	0	0	0	0	0	0	0	0	0	0	0	0	0
	Proteobacteria_Acidithiobacillia_Acidithiobacillales_Acidithiobacillaceae_Acidithiobacillus_ferrivorans	0	0	0	0	0	0	0.000559391	0	0	0	0	0	0	0	0	0	0	0	0	0	0	0	0	0	0	0.001128216	0	0	0	0	0	0	0	0	0	0	0	0	0	0	0	0	0	0	0	0	0	0
	Proteobacteria_Acidithiobacillia_Acidithiobacillales_Acidithiobacillaceae_Acidithiobacillus_ferrooxidans	0	0	0	0	0	0	0.004907383	0	0	0	0.000191262	0	0	0	0	0	0	0	0	0	0	0	0	0	0	0.000618699	0	0	0	0	0	0	0	0	0	0	0	0.000422506	0	0	0	0	0	0	0	0	0	0
	Proteobacteria_Betaproteobacteria_Burkholderiales_Comamonadaceae_Acidovorax_caeni	0	0	0	0	0	0	0	0	0	0	0	0	0	0	0	0	0	0	0	0	0	0	0	0	0	0	0	0	0	0	0	0	0	0	0	0	0	0	0	0	0	0	0	0	0	0	0	0
	Proteobacteria_Betaproteobacteria_Burkholderiales_Comamonadaceae_Acidovorax_delafieldii	0	0	0	0	0	0	0	0	0	0	0	0	0	0	0	0	0	0	0	0	0	0	0	0	0	0	0	0	0	0	0	0	0	0	0	0	0	0	0	0	0	0	0	0	0	0	0	0
	Proteobacteria_Betaproteobacteria_Burkholderiales_Comamonadaceae_Acidovorax_soli	0	0	0	0	0	0	0	0	0	0	0	0	0	0	0	0	0	0	0	0	0	0	0	0	0	0	0	0	0	0	0	0	0	0	0	0	0	0	0	0	0	0	0	0	0	0	0	0
	Proteobacteria_Gammaproteobacteria_Pseudomonadales_Moraxellaceae_Acinetobacter_baumannii	0	0	0	0	0	0	0	0	0	0	0	0	0	0	0	0	0	0	0	0	0	0	0	6.31E-05	0	0	0	0	0	0	0	0	0	0	0	0	0	0.000196376	0	0	0	0	0	0	0	0	0	0
	Proteobacteria_Gammaproteobacteria_Pseudomonadales_Moraxellaceae_Acinetobacter_bouvetii	0	0	0	0	0	0	0	0	0	0	0	0	0	0	0	0	0	0	0	0	0	0	0	0	0	0	0	0	0	0	0	0	0	0	0	0	0	0	0	0	0	0	0	0	0	0	0	0
	Proteobacteria_Gammaproteobacteria_Pseudomonadales_Moraxellaceae_Acinetobacter_calcoaceticus	0	0	0	0	0	0	0.000305122	0	0	0	0	5.86E-05	0	0	0	0	0	0	0	0	0	0	0	0	0	0	0	0	0	0	0	0	0	0	0	0	0	0	0	0	0	0	0	0	0	0	0	0
	Proteobacteria_Gammaproteobacteria_Pseudomonadales_Moraxellaceae_Acinetobacter_guillouiae	0	0	0	0	0	0	0	0	0	0	0	0	0	0	0	0	0	0	0	0	0	0	0	0	0	0	0	0	0	0	0	0	0	0	0	0	0	0	0	0	0	0	0	0	0	0	0	0
	Proteobacteria_Gammaproteobacteria_Pseudomonadales_Moraxellaceae_Acinetobacter_johnsonii	0	0	0.000241474	0	0	0	0	0	0	0	0	0	0	0	0	0	0	0	0	0	0	0	0	0	0	0	0	0	0	0	0	0	0	0	0	0	0	0	0	0	0	0	0	0	0	0	0	0
	Proteobacteria_Gammaproteobacteria_Pseudomonadales_Moraxellaceae_Acinetobacter_lwoffii	0	0.000207135	0	0	0	0	0.000635671	0	3.99E-05	0	0	0.000680906	0.001370204	0	0	0	0	0	0	3.81E-05	0	0	0	0	0.003345581	0	0	0	0.00028398	0	5.04E-05	0	0	0.000265235	0	0.000293872	0	4.17E-05	0	0	3.88E-05	0	8.66E-05	0.000196151	0	0	0	0
	Proteobacteria_Gammaproteobacteria_Pseudomonadales_Moraxellaceae_Acinetobacter_marinus	0	0	0	0	0	0	0	0	0	0	0	0	0	0	0	0	0	0	0	0	0	0	0	0	0	0	0	0	0	0	0	0	0	0	0	0	0	0	0	0	0	0	0	0	0	0	0	0
	Proteobacteria_Gammaproteobacteria_Pseudomonadales_Moraxellaceae_Acinetobacter_schindleri	0	0	0	0	0	0	0	0	0	0	0	2.23E-05	0	0	0	0	0	0	0	0	0	0	0	0	0	0	0	0	0	0	0	0	0	0	0	0	0	0	0	0	0	0	0	0	0	0	0	0
	Proteobacteria_Gammaproteobacteria_Pseudomonadales_Moraxellaceae_Acinetobacter_soli	0	0	0	0	0	0	0	0	0	0	0	0	0	0	0	0	0	0	0	0	0	0	0	0	0	0	0	0	0	0	0	0	0	0	0	0	0	0	0	0	0	0	0	0	0	0	0	0
	Proteobacteria_Gammaproteobacteria_Pseudomonadales_Moraxellaceae_Acinetobacter_sp.	0	0	0	0	0	0	0	0	0	0	0	0	0	0	0	0	0	0	0	0	0	0	0	0	0	0	0	0	0	0	0	0	0	0	0	0	0	0	0	0	0	0	0	0	0	0	0	0
	Proteobacteria_Gammaproteobacteria_Pseudomonadales_Moraxellaceae_Acinetobacter_venetianus	0	0	0	0	0	0	0	0	0	0	0	0	0	0	0	0	0	0	0	0	0	0	0	0	0	0	0	0	0	0	0	0	0	0	0	0	0	0	0	0	0	0	0	3.65E-05	0	0	0	0
	Proteobacteria_Betaproteobacteria_Burkholderiales_Oxalobacteraceae_Actimicrobium_antarcticum	0	0	0	0	0	0	0	0	0	0	0	0	0	0	0	0	0	0	0	0	0	0	0	0	0	0	0	0	0	0	0	0	0	0	0	0	0	0	0	0	0	0	0	0	0	0	0	0
Cluster4	Proteobacteria_Gammaproteobacteria_Pasteurellales_Pasteurellaceae_Actinobacillus_minor	0.000526241	0.000214806	0	2.87E-05	0	0	0.000355976	0	0	0.000283943	0.000201329	0.000516261	0.002931407	0.000703322	0	0	0	0.000994522	0	0	0.002222454	0	0.000459298	0	0.000293096	0.003229974	0	0	0.001703878	0	0	0	0	0	5.57E-05	0.000170136	0	0.005028415	0.000184812	0	0	0	0	0	0	0.000103889	0.000489536	0.002054568
	Proteobacteria_Gammaproteobacteria_Pasteurellales_Pasteurellaceae_Actinobacillus_parahaemolyticus	0	1.92E-05	0	0	0	0	0	0	0	0	0	0	0	0.000903129	0	0.000265675	0	0	0	0	0	0	0	0	0	0	0	0	0	0	0	0	0	0	0	0	0	0	0.000285618	0	0	0	0	0	0	0	0	0.002322213
	Proteobacteria_Gammaproteobacteria_Pasteurellales_Pasteurellaceae_Actinobacillus_porcinus	0	0	0	0	0	0	0	0	0	0	0	0	0	0	0	0	0	0	0	0	0	0	0	0	0	0	0	0	0	0	0	0	0	0	0	0	0	0	0	0	0	0	0	0	0	0	0	0
	Proteobacteria_Gammaproteobacteria_Pasteurellales_Pasteurellaceae_Actinobacillus_succinogenes	0	0	0	0	0	0	0	0	0	0	0	0	0	0	0	0	0	0	0	0	0	0	0	0	0	0	0	0	0	0	0	0	0	0	0	0	0	0	0	0	0	0	0	0	0	0	0	0
	Actinobacteria_Actinomycetales_Actinomycineae_Actinomycetaceae_Actinobaculum_sp.	0	0	0	8.60E-05	0	0	0	0	0	0	0	0	0	0	0	0	0	0	0	0	0	0	0	0	3.57E-05	0	0	0	0	0	0	0	0	0	0	0	0	0	0	0	0	0	0	0	0.00010774	8.75E-05	0	0
	Actinobacteria_Actinomycetales_Actinomycineae_Actinomycetaceae_Actinomyces_cardiffensis	0	0	0	0	0	0	0	0	0	0	0	0	0	0	0	0	0	0	0	0	0	0	0	0	0	0	0	0	0	0	0	0	0	0	0	0	0	0	0	0	0	0	0	0	0	0	0	0
	Actinobacteria_Actinomycetales_Actinomycineae_Actinomycetaceae_Actinomyces_catuli	0	0	0	0	0	0	0	0	0	0	0	0	0	0	0	0	0	0	0	0	0	0	0	0	0	0	0	0	0	0	0	0	0	0	0	0	0	0	0	0	0	0	0	0	0	2.73E-05	0	0
	Actinobacteria_Actinomycetales_Actinomycineae_Actinomycetaceae_Actinomyces_georgiae	0	0	0	0	0	0	0	0	0	0	0	0	0	0	0	0	0	0	0	0	0	0	0	0	0	0	0	0	0	0	0	0	0	0	0	0	0	0	0	0	0	0	0	0	0	0	0	0
	Actinobacteria_Actinomycetales_Actinomycineae_Actinomycetaceae_Actinomyces_gerencseriae	0	0	0	0	0	0	0	0	0	0	0	0	0	0	0	0	0	0	0	0	0	0	0	0	0	0	0	0	0	0	0	0	0	0	0	0	0	0	0	0	0	0	0	0	0	0	0	0
	Actinobacteria_Actinomycetales_Actinomycineae_Actinomycetaceae_Actinomyces_graevenitzii	0	0	0	0	0	0	0	0	0	0	0	0	0	0	0	0	0	0	0	0	0	0	0	0	0	0	0	0	0	0	0	0	0	0	0	0	0	0	0	0	0	0	0	0	0	0	0	0
	Actinobacteria_Actinomycetales_Actinomycineae_Actinomycetaceae_Actinomyces_howellii	0	0	0	0	0	0	0	0	0	0	0	0	0	0	0	0	0	0	0	0	0	0	0	0	0	0	0	0	0	0	0	0	0	0	0	0	0	0	0	0	0	0	0	0	0	0	0	0
	Actinobacteria_Actinomycetales_Actinomycineae_Actinomycetaceae_Actinomyces_lingnae	0	0	0	0	0	0	0	0	0	0	0.000342259	0	0	0	0	0	0	0	0	0	0	0	0	0	0	0	0	0	0	0	0	0	0	0	0	0	0	0	0	0	0	0	0	0	0	0	0	0
	Actinobacteria_Actinomycetales_Actinomycineae_Actinomycetaceae_Actinomyces_massiliensis	0	0	0	0	0	0	0	0	0	0	0	0	0	0	0	0	0	0	0	0	0	0	0	0	0	0	0	0	0	0	0	0	0	0	0	0	0	0	0	0	0	0	0	0	0	0	0	0
	Actinobacteria_Actinomycetales_Actinomycineae_Actinomycetaceae_Actinomyces_meyeri	0	0.000517837	0	0	0	0	0	0	0	0	0	0	0	0	0	0	0	0	0	0	0	0	0	0	0	0	0	0	0	0	0	0	0	0	0	0	0	0	0	0	0	0	0	0	0	0	0	0
	Actinobacteria_Actinomycetales_Actinomycineae_Actinomycetaceae_Actinomyces_naeslundii	0	0	0	0	0	0	0	0	0	0	0	0	0	0	0	0	0	0	0	0	0	0	0	0	0	0	0	0	0	0	0	0	0	0	0	0	0	0	0	0	0	0	0	0	0	0	0	0
Cluster1	Actinobacteria_Actinomycetales_Actinomycineae_Actinomycetaceae_Actinomyces_odontolyticus	0.002739153	0.001499808	0	0.000126079	0.000603005	0.000559409	0.000152561	0.000803374	0.000159421	0	0	0.000136739	7.47E-05	6.39E-05	0.000372823	0.001655358	0.000527804	5.90E-05	0.000169816	3.18E-05	0.000431999	0.000266809	0	0	0	0.000254759	6.29E-05	7.49E-05	0.000307005	6.35E-05	0.001228798	0.000226809	7.66E-05	0.000109215	0.000688902	0.000680546	0.002143414	0.000720045	0	0.000136041	0.00022158	0	9.82E-05	0.000232644	5.39E-05	0.000311666	0.000111258	0.001306737
	Actinobacteria_Actinomycetales_Actinomycineae_Actinomycetaceae_Actinomyces_oris	0	0	0	0	0	0	0	0	0	0	0	0	0	0	0	0	0	0	0	0	0	0	0	0	0	0	0	0	0	0	0	0	0	0	0	0	0	0	0	0	0	0	0	0	0	0	0	0
	Actinobacteria_Actinomycetales_Actinomycineae_Actinomycetaceae_Actinomyces_radingae	0	0	0	0	0	0	0	0	0	0	0	0	0	0	0	0	0	0	0	0	0	0	0	0	0	0	0	0	0	0	0	0	0	0	0	0	0	0	0	0	0	0	0	0	0	0	0	0
	Actinobacteria_Actinomycetales_Actinomycineae_Actinomycetaceae_Actinomyces_sp.	0	0	0	0	0	0	0	0	0	8.11E-05	0	0	0	0	0	0	0	0	9.31E-05	0	4.68E-05	0	0	0	0	0	8.09E-05	0	0	0	0	0	0	0	0	0	0	0	0	0	0	0	0	0	0	3.83E-05	0	0
	Actinobacteria_Actinomycetales_Actinomycineae_Actinomycetaceae_Actinomyces_turicensis	0	0	0	0	0	0	0	0	0	0	0	0	0	0	0	0	0	0	0	0	0	0	0	0	0	0	0	0	0	0	0	0	0	0	0	0	0	0	0	0	0	0	0	0	0	0	0	0
	Actinobacteria_Actinomycetales_Pseudonocardineae_Pseudonocardiaceae_Actinomycetospora_chiangmaiensis	0	0	0	0	0	0	0	0	0	0	0	0	0	0	0	0	0	0	0	0	0	0	0	0	0	0	0	0	0	0	0	0	0	0	0	0	0	0	0	0	0	0	0	0	0	0	0	0
	Proteobacteria_Betaproteobacteria_Burkholderiales_Alcaligenaceae_Advenella_incenata	0	0	0	0	0	0	0	0	0	0	0	0	0	0	0	0	0	0	0	0	0	0	0	0	0	0	0	0	0	0	0	0	0	0	0	0	0	0	0	0	0	0	0	0	0	0	0	0
	Firmicutes_Bacilli_Bacillales_Bacillaceae_Aeribacillus_pallidus	0	0	0	0	0	0	0	0	0	0	0	0	0	0	0	0	0	0	0	0	0	0	0	0	0	0	0	0	0	0	0	0	0	0	0	0	0	0	0	0	0	0	0	0	0	0	0	0
	Firmicutes_Bacilli_Lactobacillales_Aerococcaceae_Aerococcus_urinaeequi	0	0	8.36E-05	0	0	0	0.000419543	0	5.48E-05	0	0	8.93E-05	0	0	0	0	0	0	0	0	0	0	0	0	0.000100081	0	0	0	0	0	0	0	0	0	0	0	0	0	0	0	0	0	2.89E-05	0	0	0	0	0
	Proteobacteria_Gammaproteobacteria_Aeromonadales_Aeromonadaceae_Aeromonas_media	0	0	0	0	0	0	0	0	0	0	0	0	0	0	0	0	0	0	0	0	0	0	0	0	0	0	0	0	0	0	0	0	0	0	0	0	0	0	0	0	0	0	0	0	0	0	0	0
	Proteobacteria_Gammaproteobacteria_Aeromonadales_Aeromonadaceae_Aeromonas_salmonicida	0	0	0	0	0	0	0	0	0	0	0	0	0	0	0	0	0	0	0	0	0	0	0	0	0	0	0	0	0	0	0	0	0	0	0	0	0	0	0	0	0	0	0	0	0	0	0	0
	Proteobacteria_Gammaproteobacteria_Aeromonadales_Aeromonadaceae_Aeromonas_sanarellii	0	0	0	0	0	0	0	0	0	0	0	0	0	0	0	0	0	0	0	0	0	0	0	0	0	0	0	0	0	0	0	0	0	0	0	0	0	0	0	0	0	0	0	0	0	0	0	0
	Proteobacteria_Gammaproteobacteria_Aeromonadales_Aeromonadaceae_Aeromonas_sharmana	0	0	0	0	0	0	0	0	0	0	0	0	0	0	0	0	0	0	0	0	0	0	0	0	0	0	0	0	0	0	0	0	0	0	0	0	0	0	0	0	0	0	0	0	0	0	0	0
	Proteobacteria_Gammaproteobacteria_Aeromonadales_Aeromonadaceae_Aeromonas_sobria	0	0	0	0	0	0	0	0	0	0	0	0	0	0	0	0	0	0	0	0	0	0	0	0	0	0	0	0	0	0	0	0	0	0	0	0	0	0	0	0	0	0	0	0	0	0	0	0
	Proteobacteria_Gammaproteobacteria_Aeromonadales_Aeromonadaceae_Aeromonas_sp.	0	0	0	0	0	0	0	0	0	0	0	0	0	0	0	0	0	0	0	0	0	0	0	0	0	0	0	0	0	0	0	0	0	0	0	0	0	0	0	0	0	0	0	0	0	0	0	0
	Proteobacteria_Alphaproteobacteria_Rhizobiales_Bradyrhizobiaceae_Afipia_clevelandensis	0	0	0	0	0	0	0	0	0	0	0	0	0	0	0	0	0	0	0	0	0	0	0	0	0	0	0	0	0	0	0	0	0	0	0	0	0	0	0	0	0	0	0	0	0	0	0	0
	Proteobacteria_Alphaproteobacteria_Rhizobiales_Bradyrhizobiaceae_Afipia_genosp.	0	0	0	0	0	0	0	0	0	0	0	0	0	0	0	0	0	0	0	0	0	0	0	0	0	0	0	0	0	0	0	0	0	0	0	0	0	0	0	0	0	0	0	0	0	0	0	0
	Proteobacteria_Gammaproteobacteria_Pasteurellales_Pasteurellaceae_Aggregatibacter_actinomycetemcomitans	0	0	0	0	0	0	0	0	0	0	0	0	0	0	0	0	0	0	0	0	0	0	0	0	0	0	0	0	0	0	0	0	0	0	0	0	0	0	0	0	0	0	0	0	0	0	0	0
	Proteobacteria_Gammaproteobacteria_Pasteurellales_Pasteurellaceae_Aggregatibacter_aphrophilus	0	0	0	0	0	0	0	0	0	0	0.000191262	0	0	0	0	0	0	0	0	0	4.68E-05	0	0	0	0	0	0	0	0	0	0	0	0	0	0	0	0	0	0	0	0	0	0	0	0	0	0	0
	Proteobacteria_Gammaproteobacteria_Pasteurellales_Pasteurellaceae_Aggregatibacter_segnis	0	0.000372075	0.000222899	0	0	0	0.000750092	0	0	0.00012676	0.000100664	0	0	9.99E-05	0	0	0	0	2.74E-05	0	0.00026024	0.00536159	0	0	0	0.00386687	8.99E-05	0	0	0.000228571	0	0	0	7.80E-05	0	0	0	0	0	0	0	0	0	0	0	0	0.000389404	0.001503534
	Actinobacteria_Actinobacteria_Micrococcales_Microbacteriaceae_Agromyces_italicus	0	0	0	0	0	0	0	0	0	0	0	0.001230654	0.001743896	0	0	0	0	0	0	0	0	0	0	0	0	0	0	0	0	0	0	0	0	0	0	0	0	0	0	0	0	0	0	0	0	0	0	0
Cluster2	Verrucomicrobia_Verrucomicrobiae_Verrucomicrobiales_Akkermansiaceae_Akkermansia_muciniphila	0.000458774	0.001495972	0	0.001512946	0	0	7.63E-05	0.001933119	0	0.000349858	0	0.000424171	0.001411726	0.000339673	0	0.004250797	0.000164206	0	3.83E-05	0.00031766	0.000379951	6.35E-05	0.002864568	0	0.000157271	0	0	0	0	0	0	0.000552846	0	0.012481668	0.000180924	0	0.105157184	0.003344342	0.00015121	0.000272081	3.32E-05	0	0.030787359	2.74E-05	4.62E-05	0	7.79E-05	0.003408536
	Proteobacteria_Betaproteobacteria_Burkholderiales_Alcaligenaceae_Alcaligenes_faecalis	0	0	0	0	0	0	0	0	0	0	0	0	0	0	0	0	0	0	0	0	0	0	0	0	0	0	0	0	0	0	0	0	0	0	0	0	0	0	0	0	0	0	0	0	0	0	0	0
	Proteobacteria_Betaproteobacteria_Burkholderiales_Alcaligenaceae_Alcaligenes_sp.	0	0	0	0	0	0	0	0	0	0	0	0	0	0	0	0	0	0	0	0	0	0	0	0	0	0	0	0	0	0	0	0	0	0	0	0	0	0	0	0	0	0	0	0	0	0	0	0
	Proteobacteria_Gammaproteobacteria_Oceanospirillales_Alcanivoracaceae_Alcanivorax_dieselolei	0	0	0	0	0	0	0	0	0	0	0	0	0	0	0	0	0	0	0	0	0	0	0	0	0	0	0	0	0	0	0	0	0	0	0	0	0	0	0	0	0	0	0	0	0	0	0	0
	Proteobacteria_Gammaproteobacteria_Oceanospirillales_Alcanivoracaceae_Alcanivorax_pacificus	0	0	0	0	0	0	0	0	0	0	0	0	0	0	0	0	0	0	0	0	0	0	0	0	0	0	0	0	0	0	0	0	0	0	0	0	0	0	0	0	0	0	0	0	0	0	0	0
	Proteobacteria_Gammaproteobacteria_Oceanospirillales_Alcanivoracaceae_Alcanivorax_venustensis	0	0	0	0	0	0	0	0	0	0	0	0	0	0	0	0	0	0	0	0	0	0	0	0	0	0	0	0	0	0	0	0	0	0	0	0	0	0	0	0	0	0	0	0	0	0	0	0
	Firmicutes_Bacilli_Bacillales_Alicyclobacillaceae_Alicyclobacillus_aeris	0	0	0	0	0	0	0.000317836	0	0	0	0	0	0	0	0	0	0	0	0	0	0	0	0	0	0	0	0	0	0	0	0	0	0	0	0	0	0	0	0	0	0	0	0	0	0	0	0	0
	Firmicutes_Bacilli_Bacillales_Alicyclobacillaceae_Alicyclobacillus_sp.	0	0	0	0	0	0	0.000368689	0	0	0	0	0	0	0	0	0	0	0	0	0	0	0	0	0	0	0	0	0	0	0	0	0	0	0	0	0	0	0	0	0	0	0	0	0	0	0	0	0
	Bacteroidetes_Bacteroidia_Bacteroidales_Rikenellaceae_Alistipes_Alistipes	0	0.000226314	0	0	0	0	0	0	0	0	0	0	0	0	0	0	0	0	0	0	0	0	0	0	0	0	0	0	0	0	0	0	0	0	0	0	0	0	0	0	0	0	0	0	0	0	0	0
	Bacteroidetes_Bacteroidia_Bacteroidales_Rikenellaceae_Alistipes_finegoldii	0	0	0	0	0	0	0	0	0	0	0	0	0	0	0	0	0	0	0	0	0	0	0	0	0	0	0	0	0	0	0	0	0	0	0	0	0	0	0.000201613	0	0	0	0	0	0	0	0	0
	Bacteroidetes_Bacteroidia_Bacteroidales_Rikenellaceae_Alistipes_indistinctus	0	0	0	0	0	0	8.90E-05	0	0	0	0	0	0	0	0	0	0	0	0	0	6.77E-05	0	0	0	0	0	0	0	0	0	0	0.003657292	0	0	0	0	0	0.000714094	0	0	0	0	0	0	0.000369393	0.002520668	0	0
Cluster0	Bacteroidetes_Bacteroidia_Bacteroidales_Rikenellaceae_Alistipes_onderdonkii	0	0.002919064	0	0	0.001474012	0.003225927	0.000228842	0.000326371	0.000697468	0.001318305	0.001882424	0.001272513	0.001121076	0	0	0	0	0.001677202	0.000372499	0.000235068	8.85E-05	0	0	0	0.002766538	0	0	0.003546586	0.001512	0	0.003102212	0.006166364	0	0	0	0.003480063	0.029942842	0	0	0	0	0	0	0.002618386	0.00033861	0	0.004683971	0
Cluster0	Bacteroidetes_Bacteroidia_Bacteroidales_Rikenellaceae_Alistipes_putredinis	0.004796891	0	0.003139163	0	0.005334919	0.008397355	0.001017074	0.002903863	0.001853273	0.001997739	0.004942621	0.004442634	0.003695399	0.005894318	0.010548708	0.000919644	0.001583411	0.006818373	0.002711571	0.002706463	0.000869203	0	0.000290083	0.006963806	0.008657049	0.010954617	7.19E-05	0.030145984	0.000851939	0.003352381	0.006154063	0.002608301	0	0.025322183	0.006798555	0	0.000454664	0.007676515	0.008602151	0.000748223	0.004470369	0.002745209	0.009126459	0.002276263	0.016484151	0.001623945	0.000433907	0
	Bacteroidetes_Bacteroidia_Bacteroidales_Rikenellaceae_Alistipes_senegalensis	0	0	0	0	0	0	0	0	0	0	0	0	0	0	0	0	0	0	0	0	0	0	0	0	0	0	0	0	0	0	0	0	0	0.000218429	0	0	0	0	0	0	0	0	5.20E-05	0	6.16E-05	0	0	0
Cluster0	Bacteroidetes_Bacteroidia_Bacteroidales_Rikenellaceae_Alistipes_shahii	0	0	0	0	4.19E-05	0	0.000292409	0	0	4.06E-05	0	0.000851133	0.000763993	0.000627395	0	0.000643751	0.000211121	0	0.00044919	0.000412958	0.000109301	0	0	0	0.002401956	0.006032318	0.000809178	0	0	0	0	0	0	0.007894655	0.007334368	0	0.00032476	0.000559374	0	0	0.003556353	0	0.005966856	0	0.001169744	0.003144001	0	0
	Bacteroidetes_Bacteroidia_Bacteroidales_Rikenellaceae_Alistipes_sp.	0	0	0.000185749	0	0	0	0	9.21E-05	0	0	0	0	0	0.000607414	0	0	0	0	0	0	0	0	0	0	0	0	0	0	0	0	0	0	0	0	0	0	0	0.000743848	0.000571237	0	0	0	0	0	0.000153914	0	0	0
	Bacteroidetes_Bacteroidia_Bacteroidales_Rikenellaceae_Alistipes_timonensis	0	0	0	0	0	0	0	0	0	0	0	0	0	0	0	0	0	0	0	0	0	0	0	0	0	0	0	0	0	0	0	0	0	0	0	0	0	0	0	0	0	0	0	0	0	0	0	0
	Firmicutes_Clostridia_Clostridiales_Clostridiaceae_Alkaliphilus_oremlandii	0	0	0	0	0	0	0	0	0	0	0	0	0	0	0	0	0	0	0	0	0	0	0	0	0	0	0	0	0	0	0	0	0	0	0	0	0	0	0	0	0	0	0	0	0	0	0	0
	Proteobacteria_Gammaproteobacteria_Pseudomonadales_Moraxellaceae_Alkanindiges_illinoisensis	0	0	0	0	0	0	0	0	0	0	0	0	0	0	0	0	0	0	0	0	0	0	0	0	0	0	0	0	0	0	0	0	0	0	0	0	0	0	0	0	0	0	0	0	0	0	0	0
	Firmicutes_Negativicutes_Veillonellales_Veillonellaceae_Allisonella_histaminiformans	0	0.001173763	0	0.000808051	0	0	0	0	0	0	0	0	0	2.00E-05	0	0.000306548	0.000187663	0	7.67E-05	0	0	0	0	0	3.57E-05	7.28E-05	0	0	0	0	0	0	0.000510725	0	0.000160048	0	0	0.000124967	0	0	0	0	0.000369679	0	5.39E-05	0	0	0
	Actinobacteria_Actinobacteria_Bifidobacteriales_Bifidobacteriaceae_Alloscardovia_omnicolens	0	0	0	0	0	0	0	0	0	0	0	0	0	0	0	0	0	0	0	0	0	0	0	0	0	0	0	0	0	0	0	0	0	0	0	0	0	0	0	0	0	0	0	0	0	0	0	0
	Proteobacteria_Alphaproteobacteria_Sphingomonadales_Erythrobacteraceae_Altererythrobacter_dongtanensis	0	0	0	0	0	0	0	0	0	0	0	0	0	0	0	0	0	0	0	0	0	0	0	0	0	0	0	0	0	0	0	0	0	0	0	0	0	0	0	0	0	0	0	0	0	0	0	0
	Proteobacteria_Alphaproteobacteria_Sphingomonadales_Erythrobacteraceae_Altererythrobacter_epoxidivorans	0	0	0	0	0	0	0	0	0	0	0	0	0	0	0	0	0	0	0	0	0	0	0	0	0	0	0	0	0	0	0	0	0	0	0	0	0	0	0	0	0	0	0	0	0	0	0	0
	Proteobacteria_Alphaproteobacteria_Sphingomonadales_Erythrobacteraceae_Altererythrobacter_sp.	0	0	0	0	0	0	0	0	0	0	0	0	0	0	0	0	0	0	0	0	0	0	0	0	0	0.000418532	0	0	0	0	0	0	0	0	0	0	0	0	0	0	0	0	0	0	0	0	0	0
	Proteobacteria_Alphaproteobacteria_Sphingomonadales_Erythrobacteraceae_Altererythrobacter_troitsensis	0	0	0	0	0	0	0	0	0	0	0	0	0	0	0	0	0	0	0	0	0.000317493	0	0	0	0	0	0	0	0	0	0	0	0	0	0	0	0	0	0	0	0	0	0	0	0	0	0	0
	Proteobacteria_Gammaproteobacteria_Alteromonadales_Alteromonadaceae_Alteromonas_sp.	0	0	0	0	0	0	0	0	0	0	0	0	0	0	0	0	0	0	0	0	0	0	0	0	0	0	0	0	0	0	0	0	0	0	0	0	0	0	0	0	0	0	0	0	0	0	0	0
	Synergistetes_Synergistia_Synergistales_Synergistaceae_Anaerobaculum_mobile	0	0	0	0	0	0	0.000165275	0	0	0	0	0	0	0	0	0	0	0	0	0	0	0	0	0	0	0	0	0	0	0	0	0	0	0	0	0	0	0	0	0	0	0	0	0	0	0	0	0
Cluster2	Proteobacteria_Gammaproteobacteria_Aeromonadales_Succinivibrionaceae_Anaerobiospirillum_succiniciproducens	0.005869614	0	0.000603685	0.001260788	0.000209377	0	0.002809667	0.000736426	0.000797107	0.003970125	0	0.002413868	0.003869789	0.000287723	0	0.000214584	0	0	0.001292789	0.00061626	0.00067142	0.002744321	0.025104249	0.00449115	0.00286662	0	0.005808099	0	0.001512	0.000139683	0.006285001	0	0	7.80E-05	8.35E-05	0.000386674	0.000584567	0.00090452	0.000420027	0.000113367	0	0	0	0	0	0	0	0
	Firmicutes_Tissierellia_Tissierellales_Peptoniphilaceae_Anaerococcus_murdochii	0	0	0	0	0	0	0	0	0	0	0	0	0	0	0	0	0	0	0	0	0	0	0	0	0	0	0	0	0	0	0	0	0	0	0	0	0	0	8.40E-05	0	0	0	0	0	0	0	0	0
	Firmicutes_Tissierellia_Tissierellales_Peptoniphilaceae_Anaerococcus_octavius	0	0	0	0	0	0	0	0	0	0	0	0	0	0	0	0	0	0	0	0	0	0	0	0	0	0	0	0	0	0	0	0	0	0	0	0	0	0	0	0	0	0	0	0	0	0	0	0
	Firmicutes_Tissierellia_Tissierellales_Peptoniphilaceae_Anaerococcus_prevotii	0	0	0	0	0	0	0	0	0	0	0	0	0	0	0	0	0	0	0	0	0	0	0	0	0	0	0	0	0	0	0	0	0	0	0	0	0	0	0	0	0	0	0	0	0	0	0	0
	Firmicutes_Tissierellia_Tissierellales_Peptoniphilaceae_Anaerococcus_senegalensis	0	0	0	0	0	0	0	0	0	0	0	0	0	0	0	0	0	0	0	0	0	0	0	0	0	0	0	0	0	0	0	0	0	0	0	0	0	0	0	0	0	0	0	0	0	0	0	0
	Firmicutes_Tissierellia_Tissierellales_Peptoniphilaceae_Anaerococcus_sp.	0	0	0	0	0	0	0.000228842	0	0	0	0	0	0	0	0	0	0	0	0	0	0	0	0	0	0	0	0	0	0	0	0	0	0	0	0	0	0	0	0	0	0	0	0	0	0	0	0	0
	Firmicutes_Tissierellia_Tissierellales_Peptoniphilaceae_Anaerococcus_vaginalis	0	0	0	0	0	0	0	0	0	0	0	0	0	0	0	0	0	0	0	0	0	0	0	0	0	0	0	0	0	0	0	0	0	0	0	0	0	0	0	0	0	0	0	0	0	0	0	0
	Firmicutes_Clostridia_Clostridiales_Eubacteriaceae_Anaerofustis_stercorihominis	0	0	0	0	0	0	0	0	0	0	0	0	0	0	0	0	0	0	0	0	0	0	0	0	0	0	0	0	0	0	0	0	0	0	0	0	0	0	0	0	0	0	0	0	0	0	0	0
	Firmicutes_Negativicutes_Veillonellales_Veillonellaceae_Anaeroglobus_geminatus	0	0	0	0	0	3.11E-05	0	0	0	0	0	0	0	0	0	0	0	0	0	0	0	0.000114347	0	0	0	0	0	0	0	0	0	0	0	0	0	0	0	0	0	0	0	0	0	0	0.000130827	0	0	0
	Firmicutes_Clostridia_Clostridiales_Lachnospiraceae_Anaerostipes_butyraticus	0	0	0	0	5.03E-05	0	0	0	0	0	0	1.40E-05	0	0	0	0	0	0	0	0	2.60E-05	0	0	0	0	0	0	0	0	0	0	0	0	0	0	0	0	0	0	0	0	0	0	0	0	0	0	0
	Firmicutes_Clostridia_Clostridiales_Lachnospiraceae_Anaerostipes_caccae	0	0	0	0	0	0	0	0	0	0	0	0	0	0	0	0	0	0	0	0	0	0	0	0	0	0	0	0	0	0	0	0	0	0	0	0	0	0	0	0	0	0	0	0	0	0	0	0
	Firmicutes_Clostridia_Clostridiales_Lachnospiraceae_Anaerostipes_sp.	0	0	0	0	0	0	0	0	0	0	0	0	0	0	0	0	0	0	0	0	0	0	0	0	0	0	0	0	0	0	0	0	0	0	0	0	0	0	0	0	0	0	0	0	0	0	0	0
	Firmicutes_Clostridia_Clostridiales_Ruminococcaceae_Anaerotruncus_colihominis	0	0	0	0	0	0	0	0	0	0	0	0	0	0	0	0	0	0	0	0	0	0	0	0	0	0	0	0	0	0	0	0	0	0	0	0	0	0	0	0	0	0	0	0	0	0	0	0
	Firmicutes_Bacilli_Bacillales_Bacillaceae_Anoxybacillus_flavithermus	0	0	0	0	0	0	0	0	0	0	0	0	0	0	0	0	0	0	0	0	0	0	0	0	0	0	0	0	0	0	0	0	0	0	0	0	0	0	0	0	0	0	0	0	0	0	0	0
	Firmicutes_Bacilli_Bacillales_Bacillaceae_Anoxybacillus_kaynarcensis	0	0	0	0	0	0	0	0	0	0	0	0	0	0	0	0	0	0	0	0	0	0	0	0	0	0	0	0	0	0	0	0	0	0	0	0	0	0	0	0	0	0	0	0	0	0	0	0
	Firmicutes_Bacilli_Bacillales_Bacillaceae_Anoxybacillus_sp.	0	0	0	0.004630532	0	0	0	0	0	0	6.54E-05	9.21E-05	0.000398605	6.79E-05	0	0	0	0	0	0.000412958	0.000109301	0	0	0	0	0	0	0	0	0	0.000745337	0	0	0	0	0	0	0	0	0	0	0	0	0	0	0	0	0
	Firmicutes_Bacilli_Bacillales_Bacillaceae_Anoxybacillus_tengchongensis	0	0	0	0	0	0	0	0	0	0	0	1.67E-05	0	0	0	0	0	0	0	0	0	0	0	0	0	0	0	0	0	0	0	0	0	0	0	0	0	0	0	0	0	0	0	0	0	0	0	0
	Unclassified Burkholderiales_____citratiphilum	0	0	0	0	0	0	0	0	0	0	0	0	0	0	0	0	0	0	0	0	0	0	0	0	0	0	0	0	0	0	0	0	0	0	0	0	0	0	0	0	0	0	0	0	0	0	0	0
	Unclassified Burkholderiales_____fontiphilum	0	0	0	0	0	0	0	0	0	0	0	0	0	0	0	0	0	0	0	0	0	0	0	0	0	0	0	0	0	0	0	0	0	0	0	0	0	0	0	0	0	0	0	0	0	0	0	0
	Unclassified Burkholderiales_____limnoticum	0	0	0	0	0	0	0	0	0	0	0	0	0	0	0	0	0	0	0	0	0	0	0	0	0	0	0	0	0	0	0	0	0	0	0	0	0	0	0	0	0	0	0	0	0	0	0	0
	Unclassified Burkholderiales_____parvum	0	0	0	0	0	0	0	0	0	0	0	0	0	0	0	0	0	0	0	0	0	0	0	0	0	0	0	0	0	0	0	0	0	0	0	0	0	0	0	0	0	0	0	0	0	0	0	0
	Proteobacteria_Alphaproteobacteria_Rhizobiales_Phyllobacteriaceae_Aquamicrobium_lusatiense	0	0	0	0	0	0	0	0	0	0	0	0	0	0	0	0	0	0	0	0	0	0	0	0	0	0	0	0	0	0	0	0	0	0	0	0	0	0	0	0	0	0	0	0	0	0	0	0
	Proteobacteria_Betaproteobacteria_Neisseriales_Chromobacteriaceae_Aquitalea_magnusonii	0	0	0	0	0	0	0	0	0	0	0	0	0	0	0	0	0	0	0	0	0	0	0	0	0	0	0	0	0	0	0	0	0	0	0	0	0	0	0	0	0	0	0	0	0	0	0	0
	Proteobacteria_Epsilonproteobacteria_Campylobacterales_Campylobacteraceae_Arcobacter_butzleri	0	0	0	0	0	0	0	0	0	0	0	0	0	0	0	0	0	0	0	0	0	0	0	0	0	0	0	0	0	0	0	0	0	0	0	0	0	0	0	0	0	0	0	0	0	0	0	0
	Proteobacteria_Epsilonproteobacteria_Campylobacterales_Campylobacteraceae_Arcobacter_cryaerophilus	0	0	0	0	0	0	0	0	0	0	0	0	0	0	0	0	0	0	0	0	0	0	0	0	0	0	0	0	0	0	0	0	0	0	0	0	0	0	0	0	0	0	0	0	0	0	0	0
	Actinobacteria_Actinobacteria_Micrococcales_Micrococcaceae_Arthrobacter_russicus	0	0	0	0	0	0	0	0	0	0	0	0	0	0	0	0	0	0	0	0	0	0	0	0	0	0	0	0	0	0	0	0	0	0	0	0	0	0	0	0	0	0	0	0	0	0	0	0
	Actinobacteria_Actinobacteria_Micrococcales_Micrococcaceae_Arthrobacter_sp.	0	0	0	0	0	0	0	0	0	0	0	0	0	0	0	0	0	0	0	0	0	0	0	0	0	0	0	0	0	0	0	0	0	0	0	0	0	0	0	0	0	0	0	0	0	0	0	0
	Actinobacteria_Coriobacteriia_Coriobacteriales_Atopobiaceae_Atopobium_parvulum	4.72E-05	0	0	0	0	0	0	0	0	0	0	0	0	0	0	0	0	0	0	0	9.89E-05	0	0	0	0	0	0	0	0.000153503	0	0	0	0	0	0	0	0	0	0	0	0	0	0	0	0	0	0	0
	Actinobacteria_Coriobacteriia_Coriobacteriales_Atopobiaceae_Atopobium_rimae	0	0	0	0	0	0	0	0	0	0	0	0	0	0	0	0	0	0	0	0	0	0	0	0	0	0	0	0	0	0	0	0	0	0	0	0	0	0	0	0	0	0	0	0	0	0	0	0
	Actinobacteria_Coriobacteriia_Coriobacteriales_Atopobiaceae_Atopobium_sp.	0	0	0	0	0	0	0	0	0	0	0	0	0	0	0	0	0	0	0	0	0	0	0	0	0	0	0	0	0	0	0	0	0	0	0	0	0	0	0	0	0	0	0	0	0	0	0	0
	Actinobacteria_Coriobacteriia_Coriobacteriales_Atopobiaceae_Atopobium_vaginae	0	0	0	0	0	0	0	0	0	0	0	0	0	0	0	0	0	0	0	0	0	0	0	0	0	0	0	0	0	0	0	0	0	0	0	0	0	0	0	0	0	0	0	0	0	0	0	0
	Proteobacteria_Alphaproteobacteria_Rhizobiales_Aurantimonadaceae_Aureimonas_altamirensis	0	0	0	0	0	0	0	0	0	0	0	0	0	0	0	0	0	0	0	0	0	0	0	0	0	0	0	0	0	0	0	0	0	0	0	0	0	0	0	0	0	0	0	0	0	0	0	0
	Proteobacteria_Alphaproteobacteria_Rhizobiales_Aurantimonadaceae_Aureimonas_jatrophae	0	0	0	0	0	0	0	0	0	0	0	0	0	0	0	0	0	0	0	0	0	0	0	0	0	0	0	0	0	0	0	0	0	0	0	0	0	0	0	0	0	0	0	0	0	0	0	0
	Proteobacteria_Betaproteobacteria_Rhodocyclales_Rhodocyclaceae_Azospira_oryzae	0	0	0	0	0	0	0	0	0	0	0	0	0	0	0	0	0	0	0	0	0	0	0	0	0	0	0	0	0	0	0	0	0	0	0	0	0	0	0	0	0	0	0	0	0	0	0	0
	Proteobacteria_Alphaproteobacteria_Rhodospirillales_Rhodospirillaceae_Azospirillum_sp.	0	0	0	0	0	0	0	0	0	0	0	0	0	0	0	0	0	0	0	0	0	0	0	0	0	0	0	0	0	0	0	0	0	0	0	0	0	0	0	0	0	0	0	0	0	0	0	0
	Proteobacteria_Betaproteobacteria_Rhodocyclales_Rhodocyclaceae_Azovibrio_restrictus	0	2.30E-05	0	0	0	0	0	0	0	0	0	0	0	0	0	0	0	0	0	0	0	0	0	0	0	0	0	0	0	0	0	0	0	0	0	0	0	0	0	0	0	0	0	0	0	0	0	0
	Firmicutes_Bacilli_Bacillales_Bacillaceae_Bacillus_cereus	0	0	0	0	0	0	0	0	0	0	0	0	0	0	0	0	0	0	0	0	0	0	0	0	0	0	0	0	0	0	0	0	0	0	0	0	0	0	0	0	0	0	0	0	0	0	0	0
	Firmicutes_Bacilli_Bacillales_Bacillaceae_Bacillus_endoradicis	0	0	0	0	0	0	0	0	0	0	0	0	0	0	0	0	0	0	0	0	0	0	0	0	0	0	0	0	0	0	0	0	0	0	0	0	0	0	0	0	0	0	0	0	0	0	0	0
	Firmicutes_Bacilli_Bacillales_Bacillaceae_Bacillus_firmus	0	0	0	0	0	0	0	0	0	0	0	0	0	0	0	0	0	0	0	0	0	0	0	0	0	0	0	0	0	0	0	0	0	0	0	0	0	0	0	0	0	0	0	0	0	0	0	0
	Firmicutes_Bacilli_Bacillales_Bacillaceae_Bacillus_flexus	0	0	0	0	0	0	0	0	0	0	0	0	0	0	0	0	0	0	0	0	0	0	0	0	0	0	0	0	0	0	0	0	0	0	0	0	0	0	0	0	0	0	0	0	0	0	0	0
	Firmicutes_Bacilli_Bacillales_Bacillaceae_Bacillus_ginsengihumi	0	0	0	0	0	0	0	0	0	0	0	0	0	0	0	0	0	0	0.000164338	0	0	0	0	0	0	0	0	0	0	0	0	0	0	0	0	0	0	0	0	0	0	0	0	0	0	0	0	0
	Firmicutes_Bacilli_Bacillales_Bacillaceae_Bacillus_kochii	0	0	0	0	0	0	0	0	0	0	0	0	0	0	0	0	0	0	0	0	0	0	0	0	0	0	0	0	0	0	0	0	0	0	0	0	0	0.00022613	0	0	0	0	0	0	0	0	0	0
	Firmicutes_Bacilli_Bacillales_Bacillaceae_Bacillus_licheniformis	0	0	0	0	0	0	0	0	0	0	0	0	0	0	0	0	0	0	0	0	0	0	0	0	0	0	0	0	0	0	0	0	0	0	0	0	0	0	0	0	0	0	0	0	0	0	0	0
	Firmicutes_Bacilli_Bacillales_Bacillaceae_Bacillus_massilioanorexius	0	0	0	0	0	0	0	0	0	0	0	0	0	0	0	0	0	0	0	0	0	0	0	0	0	0	0	0	0	0	0	0	0	0	0	0	0	0	0	0	0	0	0	0	0	0	0	0
	Firmicutes_Bacilli_Bacillales_Bacillaceae_Bacillus_megaterium	0	0	0	0	0	0	0	0	0	0	0	0	0	0	0	0	0	0	0	0	0	0	0	0	0	0	0	0	0	0	0	0	0	0	0	0	0	0	0	0	0	0	0	0	0	0	0	0
	Firmicutes_Bacilli_Bacillales_Bacillaceae_Bacillus_nealsonii	0	0	0	0	0	0	0	0	0	0	0	0	0	0	0	0	0	0	0	0	0	0	0	0	0	0	0	0	0	0	0	0	0	0	0	0	0	0	0	0	0	0	0	0	0	0	0	0
	Firmicutes_Bacilli_Bacillales_Bacillaceae_Bacillus_sp.	0	0	0	0	0	0	0	0	0	0	0	1.95E-05	0	0	0	0	0	0	0	0	0	0	0	0	0	0	0	0	0	0	0	0	0	0	0	0	0	0	0	0	0	0	0	0	0	0	0	0
	Firmicutes_Bacilli_Bacillales_Bacillaceae_Bacillus_subtilis	0	0	0	0	0	0	0	0	0	0	0	0	0	0	0	0	0	0	0	0	0	0	0	0	0	0	0	0	0	0	0	0	0	0	0	0	0	0	0	0	0	0	0	0	0	0	0	0
	Firmicutes_Bacilli_Bacillales_Bacillaceae_Bacillus_thuringiensis	0	0	0	0	0	0	0	0	0	0	0	0	0	0	0	0	0	0	0	0	0	0	0	0	0	0	0	0	0	0	0	0	0	0	0	0	0	0	0	0	0	0	0	0	0	0	0	0
	Bacteroidetes_Bacteroidia_Bacteroidales_Bacteroidaceae_Bacteroides_acidifaciens	0	0	0	0	0	0	0	0	0	0	0	0	0	0	0	0	0	0	0	0	0	0	0	0	0	0	0	0	0	0	0	0	0	0	0	0	0	0	0	0	0	0	0	0	0	0	0	0
	Bacteroidetes_Bacteroidia_Bacteroidales_Bacteroidaceae_Bacteroides_barnesiae	0	0	0	0	0	0	0	0	0	0	0	0	0	0	0	0	0	0	0	0	0	0	0	0	0	0	0	0	0	0	0	0	0	0	0	0	0	0	0	0	0	0	0	0	0	0	0	0
Cluster3	Bacteroidetes_Bacteroidia_Bacteroidales_Bacteroidaceae_Bacteroides_caccae	0	0.000560031	0.000176462	4.01E-05	0	0.002585714	6.36E-05	0.000702952	0	0.000730138	0	0.002268757	0.000398605	0.002721377	0.004846704	0.000286111	0	0	0.001648854	0.000406605	0.000510071	0	0	0	5.00E-05	0	0	0	0.00033003	6.35E-05	0.000705048	0.000623724	0.000319203	0.006974132	0	0	0.00032476	6.55E-05	0	0	0.001107898	0	0	0	0.001616093	0.005227243	0	0
	Bacteroidetes_Bacteroidia_Bacteroidales_Bacteroidaceae_Bacteroides_cellulosilyticus	0	0	0	0	0	0	0	0	0	0	0	0	0	0	0	0	0	0	0	0	0	0	0	0	0	0	0	0	0	0	0	0	0	0	0	0	0	0	0	0	0	0	5.20E-05	0	0	0	0	0
	Bacteroidetes_Bacteroidia_Bacteroidales_Bacteroidaceae_Bacteroides_clarus	0	3.45E-05	0	0	0	0	0	0	0	0	0	0	0	0	0	0	0	0	0	0.000146124	0	0	0	0	0	0	0	0	0	0	0	0	0	0	0	0	0	0	0	0	0	0	0	0	0	0	0	0
Cluster0	Bacteroidetes_Bacteroidia_Bacteroidales_Bacteroidaceae_Bacteroides_coprocola	0.000492508	0.102896049	0.006454789	0.002435614	0.002613022	0.009702643	0.00493281	0.008502377	0.013794924	0.02468779	0.005435877	0.012610717	0.006743066	0.009454885	0.004122988	0.001287501	0.000129019	0.003809524	0.005477921	0.006276961	0.003986884	0.011307618	0.010986886	0.013978074	0.008678495	0.011436838	0.008541322	0.013611899	0.00390664	0.009980952	0.005136779	0	0.001634321	0.008581146	0.021355953	0	0.001623798	0.006718439	0	0.000340101	0.011084522	0.00787644	0.01795833	0.006979322	0.033830218	0.008207209	0.016277077	0.002692193
Cluster0	Bacteroidetes_Bacteroidia_Bacteroidales_Bacteroidaceae_Bacteroides_coprophilus	0.01006605	0.000187956	0.0100026	0.004716495	0.007629688	0.021257552	0.009509643	0.015389636	0.011428514	0.021331183	0.008475941	0.014611577	0.009001827	0.02235445	0.02315891	0.001348811	0.002533457	0.013316477	0.01420425	0.012248969	0.008905429	0.025384967	0.030494954	0.040521276	0.029116566	0.062297558	0.008748112	0.057906765	0.008081909	0.038298413	0.009820313	0.020341914	0.043028601	0.038084688	0.023179107	0.003866737	0.013510003	0.02729626	0.05625	0.002992892	0.020839565	0.005490417	0.044066935	0.019724568	0.012166873	0.003794672	0.027013496	0.004817608
Cluster0	Bacteroidetes_Bacteroidia_Bacteroidales_Bacteroidaceae_Bacteroides_dorei	0.006766922	0.000122746	0.000473661	0	0.002093767	0.00774471	0.001220489	0.001129745	0.001808435	0.005181951	0	0.002461308	0.001527985	0.002133943	0.001842186	0	0	0	0.001479039	0.001658185	0.0016239	0.017240941	0.009113434	0.00555086	0.006205053	0.032927539	0.003497447	0.007292981	0.000529584	0.006044444	0.002870553	0.001616013	0	0.003448061	0	0	0	0.001094945	0.006955645	0.00172318	0.003368011	0.000153937	0.008184932	0.005159224	0.001677659	0.00279406	0.003081853	0
	Bacteroidetes_Bacteroidia_Bacteroidales_Bacteroidaceae_Bacteroides_eggerthii	0	0	0	0	0	0	0	0	0	0	0	0.000733928	0	0	0	0	0	0	0	0	6.25E-05	0	0	0	0	0	0	0	0	0	0	0	0	9.36E-05	0	0	0	8.33E-05	0	0	0	0	0	0	0.001100483	0	0.003204237	0
	Bacteroidetes_Bacteroidia_Bacteroidales_Bacteroidaceae_Bacteroides_faecichinchillae	0	0	0	0	0	0	0	0	0	0	0	0	0	0	0	0	5.86E-05	0	0	0	0	0	0	0	0	0	0	0	0	0	0	0	0	0	0	0	0	0	0	0	0	0	0	0	0	0	0	0
	Bacteroidetes_Bacteroidia_Bacteroidales_Bacteroidaceae_Bacteroides_faecis	0	0	0	0	0	0	0	0	0	0	0	0	0	0	0	0	0	0	0	9.53E-05	0	0	0	0	0	0	0	0	0	0	0	0	0	0	0	0	0	0	0	0	0	0	0	0	0	0	0	0
	Bacteroidetes_Bacteroidia_Bacteroidales_Bacteroidaceae_Bacteroides_finegoldii	0	0.001403913	0	0	0	0	7.63E-05	0	0	0	0	0	0	0	0	0	0	0	0	0.000260481	0	0	0	0	0	0	0	0	0	0	0	0	0	0	0	0	0	0	0	0	0	0	0	0	0.001516049	0	0	0
Cluster0	Bacteroidetes_Bacteroidia_Bacteroidales_Bacteroidaceae_Bacteroides_fragilis	0.000364321	0.000652091	0.000603685	0.000257889	0	0.000205117	0.000101707	0.000744795	0.000891763	0.000228168	0	0.00344639	0	0.000891141	0	0	0.002639018	0.002865571	0	0.000324013	7.29E-05	0	0	0	0.000850693	0	0.00093505	0.001923149	0.000560284	0.000711111	0.000443173	0	0	0	0	0	0	0.000178524	0.00031922	7.94E-05	0	0	0	0	0.001431397	0	0	0
Cluster0	Bacteroidetes_Bacteroidia_Bacteroidales_Bacteroidaceae_Bacteroides_intestinalis	0	0	0.000854447	0	0.000393628	0.008851098	0.000661098	0.001849434	0.003636798	0.002935763	0.000785182	0.002497586	0.000830427	0.002026047	0.008443353	0.000449604	0	0.001660346	0.001462605	0.001531121	0.001181492	0	0.003916118	0	0.003102526	0	0	0	0.000544934	0.000761905	0.000211514	0.000240984	0	0	0	0	0	0.002475527	0.002822581	0	5.54E-05	0	0.000739359	0.004046182	0	0.000694414	0.001713377	0
Cluster1	Bacteroidetes_Bacteroidia_Bacteroidales_Bacteroidaceae_Bacteroides_massiliensis	0	0.038764864	0	0	0	0	0	0.00027616	2.99E-05	0.001597177	0	0	0.001262249	0	0	0	0	0	0.000443712	0	0.001649925	0	0.003662295	0	0.000207312	0	0	0	0	0	0	0	0	0	0	0	0	0	0.000100806	0	0	0.001359776	5.78E-05	0.001934139	0	0.000311666	0.006452977	0
	Bacteroidetes_Bacteroidia_Bacteroidales_Bacteroidaceae_Bacteroides_nordii	0	0	0	0	0	0	0	0	0	0	0	0	0	0	0	0	0	0	0	0	0	0	0	0	0	0	0	0	0.000974741	0	0	0	0	0	0	0	0	0	0	0	0	0	0	0	0	0	0	0
	Bacteroidetes_Bacteroidia_Bacteroidales_Bacteroidaceae_Bacteroides_oleiciplenus	0	0	0	0	0	0	0	0	0	0	0	0	0	0	0	0	0	0	0	0	0	0	0	0	0	0	0	0	0	0	0	0	0	0	0	0	0	0	0	0	0	0	0	0	0	0	0	0
Cluster3	Bacteroidetes_Bacteroidia_Bacteroidales_Bacteroidaceae_Bacteroides_ovatus	0.001801364	0.000207135	0.000752285	0	0	0	0	0	0	0.000836616	0	0.001052056	0	0.00102701	0	0.000623314	0	8.43E-05	0.000854556	0.000463784	0.00069224	0.002490217	0	0	0.000293096	0	0	0	0.000391431	0	0.001027356	0	0	0	0	0	0	4.76E-05	0	0	0	0.000282218	0.001120591	0	5.39E-05	7.11E-05	0	0
	Bacteroidetes_Bacteroidia_Bacteroidales_Bacteroidaceae_Bacteroides_pectinophilus	0	0	0	0	0	0	0.000266982	0	0	0	0	6.98E-05	0	0	0	0	0	0	0	0	0	0	0	0	0	0	0	0.001710853	0	0	0	0	0	0	0	0	0	0	0	0	0	0	0	0	0	0	0	0
Cluster0	Bacteroidetes_Bacteroidia_Bacteroidales_Bacteroidaceae_Bacteroides_plebeius	0.042213991	0.199796701	0.033360577	0.043651931	0.032378017	0.020710574	0.032164969	0.042043248	0.063439714	0.107715632	0.02001208	0.084770027	0.027370869	0.039206205	0.047831045	0.011086814	0.030753352	0.035575221	0.027071887	0.027661832	0.023588195	0.031305585	0.046123164	0.063897965	0.101797178	0.075590494	0.021173488	0.055783808	0.028459372	0.063314286	0.027587527	0.100164436	0.035559244	0.074905607	0.045363135	0.023339623	0.076643284	0.029813443	0.001780914	0.02864787	0.015632444	0.007619878	0.062181224	0.060414471	0.058995098	0.016102751	0.049765801	0.017633075
	Bacteroidetes_Bacteroidia_Bacteroidales_Bacteroidaceae_Bacteroides_salyersiae	0	0	0	0	0.000385253	0	0	0	0	0	0	0	0	0	0	0	0	0	0	0.000349426	0.000494457	0	0	0	0	0	0	0	0	0	0	0	0	0	0	0	0	0	0	0	0	0	0	0	0.001608398	0	0	0
	Bacteroidetes_Bacteroidia_Bacteroidales_Bacteroidaceae_Bacteroides_sp.	0	0	0	0	0.000804007	0	0	0	0	0.001358868	3.02E-05	0.003050125	0	0.001023014	0.003772095	0.000684624	0	0	0.000996982	0.000819563	0.001004528	0	0	0	0	0	0	0	0	0	0.000493534	0	0	0	0	0	0	0	0	0	0	0	0	0	0	0	0	0
	Bacteroidetes_Bacteroidia_Bacteroidales_Bacteroidaceae_Bacteroides_stercorirosoris	0	0	0	0	0	0	0	0	0	0	0	0	0	0	0	0	0	0	0	0	0	0	0	0	0	0	0	0	0	0	0	0	0	0	0	0	0	0	0	0	0	0	0	0	0	0	0	0
	Bacteroidetes_Bacteroidia_Bacteroidales_Bacteroidaceae_Bacteroides_stercoris	0	0	0	0	0	0	0	0.00027616	0	0	0	0.002759902	0.000124564	0	0	0.001696232	0	0	0	0	0	0	0	0	4.29E-05	0	0	0	0.000529584	0	0.00019137	0	0	0	0	0	0	0.00052962	0	0	9.97E-05	0	0	0	6.16E-05	3.28E-05	0	0
Cluster0	Bacteroidetes_Bacteroidia_Bacteroidales_Bacteroidaceae_Bacteroides_thetaiotaomicron	0	0.000180284	0.000910172	0	0	0	0.000139848	0.001581643	0.00127537	0.003310973	0	0.0027013	0.000290649	0.000419596	0.00223694	0	0	0	0.000306764	0.00095298	0.000645396	0	0	0	0	0	0	0	0.001020792	0	0.000453245	0.000141756	0	0	0	0	0	0	0.00062164	0	0	0.001180183	0	0.00174255	0	0.000164035	0	0
Cluster0	Bacteroidetes_Bacteroidia_Bacteroidales_Bacteroidaceae_Bacteroides_uniformis	0.003933316	0.004541619	0.000148599	0.009026098	0.00242877	0.001634718	0.003814028	0.003849501	0.005788986	0.012113192	0.004323535	0.007629498	0.001702375	0.006617621	0.011798763	0.000439385	0	0	0.004245389	0.008913539	0.004944569	0.031458047	0.003348039	0.018128603	0.001973035	0.006505441	0.00155542	0.005769447	0.003676386	0.00312381	0.000694976	0	0.00034474	0	0	0	0.000844375	0.001029486	0.009912634	0.001564466	0.005888479	0.004361547	0.008739451	0.004329004	0.000777264	0.00284327	0.001312847	0.00016531
Cluster0	Bacteroidetes_Bacteroidia_Bacteroidales_Bacteroidaceae_Bacteroides_vulgatus	0.001430297	0.04835443	0.002182554	0.004441413	0.009354952	0.008179807	0.001093355	0.004686349	0.005021771	0.005080543	0.008470908	0.01146099	0.001453247	0.010178188	0.013509364	0.011444454	0.001841448	0.025301306	0.003385355	0.003576851	0.003471608	0.006937033	0.004979755	0.004693	0.000722016	0.000145576	0.003290657	0.006194038	0.00455135	0.005333333	0.004673462	0.001885348	0.018386108	0	0.010131726	0.000603211	0.013574955	0.005284299	0.009274194	0.007810994	0.007273352	0.000564435	0.001461389	0.003444045	0.010173692	0.012417436	0.000678675	0.003652565
Cluster0	Bacteroidetes_Bacteroidia_Bacteroidales_Bacteroidaceae_Bacteroides_xylanisolvens	0	0.000264672	0.000761572	0	5.86E-05	0.007328261	0.000673812	0.001313852	0.003442504	0.00227154	0	0.000725556	0.000489952	0.000811218	0.000416685	0	0.00034014	0.000623683	0.000273896	0.000730618	0.000359132	0.000266809	0	0.008099209	0.002945255	0.00466754	0.000971013	0	0.000967066	0	0.003706539	0	0	0	0	0	0	0.004361927	0.004569892	0.000453468	0.004038289	0	0.01448681	0	0.00039248	4.92E-05	0.000189139	0
Cluster0	Bacteroidetes_Bacteroidia_Bacteroidales_Porphyromonadaceae_Barnesiella_intestinihominis	0	0	0	0	0	0	0.000228842	0	9.47E-05	0	0	4.74E-05	0.000423518	0	0.003377341	0	0	0	0.000169816	0.000412958	0.000208192	0	0.005426966	0	0	0	0	0.000137368	0	0	0	0	0	0	0	0	0	0.00242197	0	0	0	0	0	0	0.000277045	0	0	0
Cluster1	Actinobacteria_Actinobacteria_Bifidobacteriales_Bifidobacteriaceae_Bifidobacterium_adolescentis	0.001558484	0.000529344	0.000984471	0.000653318	0	0	0	0	6.97E-05	0.00062873	0.000936179	0.000167436	0.000390301	0	0	0.005446334	0.000246308	0	0	0	8.85E-05	0.002248818	0.002296489	0	0	0	0.000134863	0	0.000752162	0	0.000201442	0.00089306	6.38E-05	0	0	0	0.001753702	0.000958077	0	7.94E-05	0	0	5.20E-05	0	0.000307827	6.56E-05	0	0
	Actinobacteria_Actinobacteria_Bifidobacteriales_Bifidobacteriaceae_Bifidobacterium_angulatum	0	0	0	0	0	0	0	0	0	0	0	0	0	0	0	0	0	0	0.000295808	0.000311307	5.20E-05	0	0	0	0	0	0	0	0	0	0	0	0.000932074	0	0	0	0.002273318	0	0.00047043	0	0	0	0	2.28E-05	0	0	0	0
	Actinobacteria_Actinobacteria_Bifidobacteriales_Bifidobacteriaceae_Bifidobacterium_animalis	0	0	0	0	0	0	0	0	0	0	0	0	0	0	0	0	0	0	0	0	0	0	0	0	0	0	0	0	0	0	0	0	0	0	0	0	0	0	0	0	0	0	0	0	0	0	0	0
Cluster1	Actinobacteria_Actinobacteria_Bifidobacteriales_Bifidobacteriaceae_Bifidobacterium_bifidum	0.002307365	0.004227081	0.001857493	0	4.19E-05	0.021437806	0.000788232	4.18E-05	0	0.00150591	0.001530099	0.000131158	0	5.99E-05	0	0.005517862	0	0	0.000323197	0.000120711	0	0	0.002139361	0.001223712	0.000500407	0	0.000170826	0	0.000383756	0	0.001218726	0.001559311	0	0.02148407	0.000111338	0.000696013	0.001299039	0.001773335	0.000235215	0.003208289	0	0.001282808	0	0.000255452	0.000384784	0	0	0.00016531
	Actinobacteria_Actinobacteria_Bifidobacteriales_Bifidobacteriaceae_Bifidobacterium_breve	0	0.00030303	0	0	0.000619755	0	6.36E-05	0	0	0	0	1.40E-05	0	0	0	8.17E-05	8.21E-05	0	0.000142426	0	0	0	0	0	0	0	0	0	0	0	0	0.000481969	0	0	0	0	0	3.57E-05	0	0	0	0	0	0	0.000177001	0	0	0
	Actinobacteria_Actinobacteria_Bifidobacteriales_Bifidobacteriaceae_Bifidobacterium_catenulatum	0	0	0	0	0	0	0	0	0	0	0	0	0	0	0	0.000255457	0	0	0	0	0	0	0.00172841	0	0	0	0	0	0	0	0	0	0	0	0	0	0	0.000249933	0	0	0	0	0	0	0	0	0	0
	Actinobacteria_Actinobacteria_Bifidobacteriales_Bifidobacteriaceae_Bifidobacterium_dentium	0.001315603	0.000387418	0	0	0	0	0	0	0	3.55E-05	0	0	0	0	0	0	0	0	4.38E-05	0	0	0.000177873	0	6.31E-05	0	0	0.000332662	0	0	7.62E-05	0	0	6.38E-05	0.00037445	0	0	0	5.95E-05	0	0.000770896	0.000121869	0	0	0	0	0	6.68E-05	0
Cluster2	Actinobacteria_Actinobacteria_Bifidobacteriales_Bifidobacteriaceae_Bifidobacterium_longum	8.77E-05	0.000993479	0.00205253	0	0.004664913	6.84E-05	0	0	0	0.00012169	0.002159251	0.000153483	0.001976416	0	0.002083425	0	0.000105561	0.001904762	0.001681722	0.000806856	0.000244626	0.003404991	0	0	0	0	0.004288643	0	0.001082193	0	7.05E-05	0	0	0	0.000118296	0	0.001948558	0.000130917	0	5.67E-05	0	0	0	0	0	0.000114824	0	0.001149299
	Actinobacteria_Actinobacteria_Bifidobacteriales_Bifidobacteriaceae_Bifidobacterium_merycicum	0	0	0	0	0	0	0	0	0	0	0	0	0	0	0	0	0	0	0	0	0	0	0	0	0	0	0	0	0	0	0	0	0	0	0	0	0	0	0	0	0	0	0	0	0	0	0	0
	Actinobacteria_Actinobacteria_Bifidobacteriales_Bifidobacteriaceae_Bifidobacterium_pseudocatenulatum	0	0	0	0	0	0	0	0	0	0	0	0	0	0	0	0	0	0	0	0	0	0	0	0	0	0	0	0	0	0	0	0	0	0	0	0	0	0	0	0	0	0	0	0	0	0	0	0
	Actinobacteria_Actinobacteria_Bifidobacteriales_Bifidobacteriaceae_Bifidobacterium_ruminantium	0	0	0.000863734	0.000498584	0	0	0	0	0	0.001500839	0	0.000892992	0	0	0	0.001849505	0	0	0	0	8.33E-05	0	0	0	0	0	0	0	0	0	0	0	0	0	0	0	0	0	0	0	0	0.006362727	0	0	0	0	0	0
	Actinobacteria_Actinobacteria_Bifidobacteriales_Bifidobacteriaceae_Bifidobacterium_sp.	0	0	0	0	0	0	0	0	0	0	0	0.00013953	0	0	0	0	0	0	0	0	0	0	0	0	0	0	0	0	0	0	0	0	0	0	0	0	0	0	0	0	0	0	0	0	0	0	0	0
	Actinobacteria_Actinobacteria_Bifidobacteriales_Bifidobacteriaceae_Bifidobacterium_stellenboschense	0	0	0	0	0	0	0	0	0	0	0	0	0	0	0	0	0	0	0	0	0	0	0	0	0	0	0	0	0	0	0	0	0	0	0	0	0	0	0	0	0	0	0	0	0	0	0	0
Cluster2	Proteobacteria_Deltaproteobacteria_Desulfovibrionales_Desulfovibrionaceae_Bilophila_wadsworthia	0.000586961	0.000356732	0.005442455	6.30E-05	9.21E-05	0	0	0.000100422	0.000677541	0.001901401	0.000840548	0.001085543	0.005397774	0.002169908	0	0.001563394	0.000586448	0.000345554	0	0.000527316	0.002284911	0.000546323	0.000181302	0	0.000965072	0.00018197	0.000440552	0.000262248	0.00269397	0.000596825	0	0	0	0.00291759	0.000229634	0	0.000974279	0.001565057	0.000352823	0.001258375	0	0	0.002697504	6.84E-05	0.005779457	0.000229649	0	0
	Actinobacteria_Actinobacteria_Geodermatophilales_Geodermatophilaceae_Blastococcus_aggregatus	0.000526241	0	0	0	0	0	0	0	0	0	0	0	0	0	0	0	0	0	0	0	0	0	0	0	0.000243055	0	0	0	0	0	0	0	0	0	0	0	0	0	0	0	0	0	0	0	0	0	0	0
Cluster4	Firmicutes_Clostridia_Clostridiales_Ruminococcaceae_Blautia_faecis	0	0.000368239	0	0	0.000301502	0.001597424	0.000394116	0.000142264	6.97E-05	5.58E-05	0	0	0.000714167	0.000135869	0	0	0.000175935	0	4.38E-05	3.81E-05	0.001056576	0	0.000193389	0	0.000414623	0.000191069	0	0	0.000199553	0	0.000231659	0	6.38E-05	0.000436858	0	7.73E-05	0.001883606	0.000172573	0	0	8.86E-05	0	0	0	0.001877746	3.28E-05	5.56E-05	0
	Firmicutes_Clostridia_Clostridiales_Ruminococcaceae_Blautia_glucerasea	0	0	0	0	0	0	0	0	0	0	0	0	0	0	0	0	0	0	0	0	0	0	0	0	0	0	0	0	0	0	0	0	0	0	0	0	0	0	0	0	0	0	0	0	0	0	0	0
	Firmicutes_Clostridia_Clostridiales_Ruminococcaceae_Blautia_hansenii	0	0	0	0	0	0	0	0	0	0	0	0	0	0	0	0	0	0.000269701	0	0	0	0	0	0	0	0	0	0	0	0	0	0	0	0	0	0	0	0	0	0.000124704	0	0	0	0	0	0	0	0
Cluster1	Firmicutes_Clostridia_Clostridiales_Ruminococcaceae_Blautia_luti	4.05E-05	0.000728807	0.00054796	4.58E-05	0.000510879	0.000447527	0.001029788	0.000309634	0.000996383	0.000339717	0	0.00018697	0.001793722	0.000379634	0	0.003709229	0.001243271	0.003396544	0.000356065	0.000120711	0.001295998	0	0.002236055	0.001375099	0.000142974	0.000691487	0.000152845	0	0.002655594	8.89E-05	0.001530962	0.000935586	0.00040858	0.001154554	0.000292261	0.000154669	0.002143414	0.000589128	0	0.000215398	9.42E-05	0.000307874	0.000924198	0.000301069	0.001108178	0.000300731	0.000189139	0
Cluster2	Firmicutes_Clostridia_Clostridiales_Ruminococcaceae_Blautia_obeum	8.10E-05	0.000191791	0.001662456	0.000189118	0.001591263	0.001616071	0.000368689	0	0.000438409	7.61E-05	9.06E-05	0.000245573	0.001195815	0.001326721	0.000131585	0.00040873	0.002216775	0.002646439	6.03E-05	0.000667086	0.002945922	0.000215988	0	0	0.000629084	0	0.000395598	0	0.004021767	0.000203175	0.001118005	0.000326038	0.000268131	0.00486785	0.000132213	0	0.000714471	0	0	0.001983925	4.43E-05	0.002591272	8.66E-05	0.000250891	0.002116313	0.000114824	0	0.000188926
Cluster4	Firmicutes_Clostridia_Clostridiales_Ruminococcaceae_Blautia_producta	0	3.07E-05	9.29E-05	0.000481392	0.000142376	0	0.000317836	0	0	0.000370139	0.00012583	0.000122786	0.000722471	0.000503515	0.000635993	0	0.001888364	0.005267594	0.000208161	0.000711558	0.000567324	0	0.001232852	0	0.000121528	0	4.50E-05	0.000262248	0.000199553	0.000152381	0.002145361	0.00089306	0.000191522	0	6.96E-05	0	0	7.14E-05	0	0.000396785	0	0.002899146	0	0.000342124	0	0.005779493	0	0.000488058
	Firmicutes_Clostridia_Clostridiales_Ruminococcaceae_Blautia_sp.	0	0	0	0	0	0	0	0	0	0	0	0	0	0	0	0	0	0.000126422	0	0	0	0	0	0	0	0	0	0	0	0	0	0	0	0	0	0	0	0	0	0	0	0	0	0	0	0	0	0
	Firmicutes_Clostridia_Clostridiales_Ruminococcaceae_Blautia_stercoris	0	0	0	0	0	0	0	0	0	0	0	0	0	0.000127877	0	0	0	0	0	4.45E-05	0	0	0	0	0	0	0	0	0	0	0	0	0	0	0	0	0	0	0	0	0	0	0	0	0	0	0	0
	Firmicutes_Clostridia_Clostridiales_Ruminococcaceae_Blautia_torques	0	0	0	0	0	0	0	0	0	0	0	0	0	0	0	0	0	0	0	0	0	0	0	0	0	0	0	0	0	0	0	0	0	0	0	0	0	0	0	0	0	0	0	0	0	0	0	0
Cluster1	Firmicutes_Clostridia_Clostridiales_Ruminococcaceae_Blautia_wexlerae	0.001437043	0.00264672	0.002535478	0.000223503	0.012822231	0.002846772	0.001538325	0.000543951	9.47E-05	0.000141971	0.00031206	0.000443705	0.000531473	0.001298748	0	0.000735715	0.001583411	0.000185419	0.00052588	0.000324013	0.002435851	0.000190578	0.001402067	0.000706473	0.001908697	0.000263857	0.00020679	0.00018732	0.003146802	0.000253968	0.001933846	0	0.001838611	0.001248167	0.000271386	0.000139203	0.002208366	0.000511768	0	0.003695768	0.000387764	0.000410498	0.000144406	0.000510905	0.002939751	0.000863917	0.001090331	0.000810807
	Proteobacteria_Betaproteobacteria_Burkholderiales_Alcaligenaceae_Bordetella_sp.	0	0	0	0	0	0	0	0	0	0	0	0	0	0	0	0	0	0	0	0	0	0	0	0	0	0	0	0	0	0	0	0	0	0	0	0	0	0	0	0	0	0	0	0	0	0	0	0
	Proteobacteria_Alphaproteobacteria_Rhizobiales_Bradyrhizobiaceae_Bosea_genosp.	0	0	0	0	0	0	0.000139848	0	0	0	0	0	0	0	0	0	0	0	0	0	0	0	0	0	0	0	0	0	0	0	0	0	0	0	0	0	0	0	0	0	0	0	0	0	0	0	0	0
	Proteobacteria_Alphaproteobacteria_Rhizobiales_Bradyrhizobiaceae_Bosea_sp.	0	0	0	0	0	0	0	0	0	0	0	0	0	0	0	0	0	0	0	0	0	0	0	0	0	0	0	0	0	0	0	0	0	0	0	0	0	0	0	0	0	0	0	0	0	0	0	0
	Proteobacteria_Betaproteobacteria_Burkholderiales_Comamonadaceae_Brachymonas_chironomi	0	0	0	0	0	0	0	0	0	0	0	0	0	0	0	0	0	0	0	0	0	0	0	0	0	0	0	0	0	0	0	0	0	0	0	0	0	0	0	0	0	0	0	0	0	0	0	0
	Proteobacteria_Betaproteobacteria_Burkholderiales_Comamonadaceae_Brachymonas_sp.	0	0	0	0	0	0	0	0	0	0	0	0	0	0	0	0	0	0	0	0	0	0	0	0	0	0	0	0	0	0	0	0	0	0	0	0	0	0	0	0	0	0	0	0	0	0	0	0
	Spirochaetes_Spirochaetes_Spirochaetales_Brachyspiraceae_Brachyspira_aalborgi	0	0	0	0	0	0	0	0	0	0	0	0	0	0	0	0	0	0	0	0	0	0	0	0	0	0	0	0	0	0	0	0	0	0	0	0	0	0	0	0	0	0	0	0	0	0	0	0
	Spirochaetes_Spirochaetes_Spirochaetales_Brachyspiraceae_Brachyspira_pilosicoli	0	0	0	0	0	0	0	0	0	0	0	0	0	0	0	0	0	0	0	0	0	0	0	0	0	0	0	0	0	0	0	0	0	0	0	0	0	0	0	0	0	0	0	0	0	0	0	0
	Proteobacteria_Alphaproteobacteria_Rhizobiales_Bradyrhizobiaceae_Bradyrhizobium_cytisi	0	0	0	0	0	0	0	0	0	0	0	0	0	0	0	0	0	0	0	0	0	0	0	0	0	0	0	0	0	0	0	0	0	0	0	0	0	0	0	0	0	0	0	0	0	0	0	0
	Proteobacteria_Alphaproteobacteria_Rhizobiales_Bradyrhizobiaceae_Bradyrhizobium_elkanii	0	0	0	0	0	0	0	0	0	0	0	0	0	0	0	0	0	0	0	0	0	0	0	0	0	0	0	0	0	0	0	0	0	0	0	0	0	0	0	0	0	0	0	0	0	0	0	0
	Proteobacteria_Alphaproteobacteria_Rhizobiales_Bradyrhizobiaceae_Bradyrhizobium_sp.	0	0	0	0	0	0	0	0	0	0	0	0	0	0	0	0	0	0	0	0	0	0	0	0	0	0	0	0	0	0	0	0	0	0	0	0	0	0	0	0	0	0	0	0	0	0	0	0
	Proteobacteria_Alphaproteobacteria_Rhizobiales_Bradyrhizobiaceae_Bradyrhizobium_yuanmingense	0	0	0	0	0	0	0	0	0	0	0	0	0	0	0	0	0	0	0	0	0	0	0	0	0	0	0	0	0	0	0	0	0	0	0	0	0	0	0	0	0	0	0	0	0	0	0	0
	Firmicutes_Bacilli_Bacillales_Paenibacillaceae_Brevibacillus_agri	0	0	0	0	0	0	0	0	0	0	0	0	0	0	0	0	0	0	0	0	0	0	0	0	0	0	0	0	0	0	0	0	0	0	0	0	0	0	0	0	0	0	0	0	0	0	0	0
	Actinobacteria_Actinobacteria_Micrococcales_Brevibacteriaceae_Brevibacterium_daeguense	0	0	0	0	0	0	0	0	0	0	0	0	0	0	0	0	0	0	0	0	0	0	0	0	0	0	0	0	0	0	0	0	0	0	0	0	0	0	0	0	0	0	0	0	0	0	0	0
	Actinobacteria_Actinobacteria_Micrococcales_Brevibacteriaceae_Brevibacterium_luteolum	0	0	0	0	0	0	0	0	0	0	0	0	0	0	0	0	0	0	0	0	0	0	0	0	0	0	0	0	0	0	0	0	0	0	0	0	0	0	0	0	0	0	0	0	0	0	0	0
	Actinobacteria_Actinobacteria_Micrococcales_Brevibacteriaceae_Brevibacterium_sp.	0	0	0	0	0	0	0	0	0	0	0	0	0	0	0	0	0	0	0	0	0	0	0	0	0	0	0	0	0	0	0	0	0	0	0	0	0	0	0	0	0	0	0	0	0	0	0	0
	Proteobacteria_Alphaproteobacteria_Caulobacterales_Caulobacteraceae_Brevundimonas_alba	0	0	0	0	0	0	0	0	0	0	0	0	0	0	0	0	0	0	0	0	0	0	0	0	0	0	0	0	0	0	0	0	0	0	0	0	0	0	0	0	0	0	0	0	0	0	0	0
	Proteobacteria_Alphaproteobacteria_Caulobacterales_Caulobacteraceae_Brevundimonas_aurantiaca	0	0	0	0	0	0	0	0	0	0	0	0	0	0	0	0	0	0	0	0	0	0	0	0	0	0	0	0	0	0	0	0	0	0	0	0	0	0	0	0	0	0	0	0	0	0	0	0
	Proteobacteria_Alphaproteobacteria_Caulobacterales_Caulobacteraceae_Brevundimonas_aveniformis	0	0	0	0	0	0	0	0	0	0	0	0	0	0	0	0	0	0	0	0	0	0	0	0	0	0	0	0	0	0	0	0	0	0	0	0	0	0	0	0	0	0	0	0	0	0	0	0
	Proteobacteria_Alphaproteobacteria_Caulobacterales_Caulobacteraceae_Brevundimonas_diminuta	0	0	0	0	0	0	0	0	0	0	0	0	0	0	0	0	0	0	0	0	0	0	0	0	0	0	0	0	0	0	0	0	0	0	0	0	0	0	0	0	0	0	0	0	0	0	0	0
	Proteobacteria_Alphaproteobacteria_Caulobacterales_Caulobacteraceae_Brevundimonas_halotolerans	0	0	0	0	0	0	0	0	0	0	0	0	0	0	0	0	0	0	0	0	0	0	0	0	0	0	0	0	0	0	0	0	0	0	0	0	0	0	0	0	0	0	0	0	0	0	0	0
	Proteobacteria_Alphaproteobacteria_Caulobacterales_Caulobacteraceae_Brevundimonas_terrae	0	0	0	0	0	0	6.36E-05	0	0	0	0	0	0	0	0	7.15E-05	0	0	0	0	0	0	0	0	0	0	0	0	0	0	0	0	0	0	0	0	0	0	0	0	0	0	0	0	0	0	0	0
	Firmicutes_Erysipelotrichia_Erysipelotrichales_Erysipelotrichaceae_Bulleidia_moorei	0	0.000352896	0	0	0	0	0	0	0	0	0	0	0	0	0	0	0	0	0	0	0	0	0	0	0	0	0	0	0	0	0	0	0	0	0	0	0	0	0	0	0	0	0	0	0	0	0	0
Cluster2	Firmicutes_Erysipelotrichia_Erysipelotrichales_Erysipelotrichaceae_Bulleidia_p-1630-c5	0	0	0	0	0	0	0.00088994	0	0	0.00062873	0.000236561	0.000106043	0.000141173	0	0	0	0.000410514	0	0.00052588	0.000806856	4.16E-05	0	0	0	0.000300244	0.001310187	0	0.000724303	0	0.00031746	0.001692116	0	0.000383044	0.000249633	0.002456387	0.000773347	0	0	0	0.001156345	0	0	0.002015908	0.000104918	0	0	0	0
	Proteobacteria_Betaproteobacteria_Burkholderiales_Burkholderiaceae_Burkholderia_acidipaludis	0	0	0	0	0	0	0	0	0	0	0	0	0	0	0	0	0	0	0	0	0	0	0	0	0	0	0	0	0	0	0	0	0	0	0	0	0	0	0	0	0	0	0	0	0	0	0	0
	Proteobacteria_Betaproteobacteria_Burkholderiales_Burkholderiaceae_Burkholderia_fungorum	0	0	0	0	0	0	0	0	0	0	0	0	0	0	0	0	0	0	0	0	0	0	0	0	0	0	0	0	0	0	0	0	0	0	0	0	0	0	0	0	0	0	0	0	0	0	0	0
	Proteobacteria_Betaproteobacteria_Burkholderiales_Burkholderiaceae_Burkholderia_sp.	0	0	0	0	0	0	0	0	0	0	0	0	0	0	0	0	0	0	0	0	0	0	0	0	0	0	0	0	0	0	0	0	0	0	0	0	0	0	0	0	0	0	0	0	0	0	0	0
	Proteobacteria_Gammaproteobacteria_Enterobacteriales_Enterobacteriaceae_Buttiauxella_agrestis	0	0	0	0	0	0	0	0	0	0	0	0	0	0	0	0	0	0	0	0	0	0	0	0	0	0	0	0	0	0	0	0	0	0	0	0	0	0	0	0	0	0	0	0	0	0	0	0
	Proteobacteria_Gammaproteobacteria_Enterobacteriales_Enterobacteriaceae_Buttiauxella_ferragutiae	0	0	0	0	0	0	0	0	0	0	0	0	0	0	0	0	0	0	0	0	0	0	0	0	0	0	0	0	0	0	0	0	0	0	0	0	0	0	0	0	0	0	0	0	0	0	0	0
	Firmicutes_Clostridia_Clostridiales_Clostridiaceae_Butyricicoccus_pullicaecorum	0	0	0	0	0	0	0	0	0	0	0	0	0	0	0	0	0	0	0	0	0	0	0	0	0	0	0	0	0	0	0	0	0	0	0	0	0	0	0	0	0	0	0	0	0	0	0	0
	Bacteroidetes_Bacteroidia_Bacteroidales_Porphyromonadaceae_Butyricimonas_sp.	0	0.002416571	0	0	0	0	0	0	0	0	0	0	0	0	0	0	0.000140748	0	0	0	0	0	0	0	0	0	0	0	0	0	0	0	0	0	0	0	0	0.000345146	0	0	0	0	0	0	0.001477571	0	0	0
	Bacteroidetes_Bacteroidia_Bacteroidales_Porphyromonadaceae_Butyricimonas_synergistica	0	0	0	0	0	0	0	0	0	0	0	0	0	0	0	0	0	0	0	0	0	0	0	0	0	0	0	0	0	0	0	0	0	0	0	0	0	0	0	0	0	0	0	0	0	0	0	0
	Bacteroidetes_Bacteroidia_Bacteroidales_Porphyromonadaceae_Butyricimonas_virosa	0	0	0	0	0	0	0	0	0	0	0	0	0	0	0	0	0	0	0	0	0	0	0	0	0	0	0	0	0	0	0.000564039	0	0	0	0	0	0	0	0	0	0	0	0	0	0	0	0	0
Cluster1	Firmicutes_Clostridia_Clostridiales_Lachnospiraceae_Butyrivibrio_crossotus	0	0	0	0	0.001842515	0	0.002733387	0.001113008	0.003422576	0.000167323	0.009517818	0.001035312	0.000489952	0.000275734	0.00445195	0.008031554	0.001970466	0.002798146	0.003182672	0.000235068	0.001790454	0	0	0	0	0	0	0.004308353	0	0.000228571	0	0	0	0.008471932	0	0	0.068329436	0.000166622	0	0.006280538	0.003229523	0	0	0.000260014	0	0.011466034	0.001234966	0
	Firmicutes_Clostridia_Clostridiales_Lachnospiraceae_Butyrivibrio_fibrisolvens	0	0	0	0	0	0	0	0	0	0	0	0	0	0	0	0	0	0	0	0	0	0	0	0	0	0	0	0	0	0	0	0	0	0	0	0	0	0	0	0	0	0	0	0	0	0	0	0
	Firmicutes_Clostridia_Thermoanaerobacterales_Thermoanaerobacterales_Caldicellulosiruptor_acetigenus	0	0	0	0	0	0	0	0	0	0	0	0	0	0	0	0	0	0	0	0	0	0	0	0	0	0	0	0	0	0	0	0	0	0	0	0	0	0	0	0	0	0	0	0	0	0	0	0
	Firmicutes_Clostridia_Thermoanaerobacterales_Thermoanaerobacterales_Caldicellulosiruptor_lactoaceticus	0	0	0	0	0	0	0	0	0	0	0	0	0	0	0	0	0	0	0	0	0	0	0	0	0	0	0	0	0	0	0	0	0	0	0	0	0	0	0	0	0	0	0	0	0	0	0	0
	Proteobacteria_Alphaproteobacteria_Rhizobiales_Beijerinckiaceae_Camelimonas_lactis	0	0	0	0	0	0	0	0	0	0	0	0	0	0	0	0	0	0	0	0	0	0	0	0	0	0	0	0	0	0	0	0	0	0	0	0	0	0	0	0	0	0	0	0	0	0	0	0
	Proteobacteria_Epsilonproteobacteria_Campylobacterales_Campylobacteraceae_Campylobacter_avium	0	0	0	0	0	0	0	0	0	0	0	0	0	0	0	0	0	0	0	0	0	0	0	0	0	0	0	0	0	0	0	0	0	0	0	0	0	0	0	0	0	0	0	0	0	0	0	0
	Proteobacteria_Epsilonproteobacteria_Campylobacterales_Campylobacteraceae_Campylobacter_faecalis	0	0	0	0	0	0	0	0	0	0	0	0	0	0	0	0	0	0	0	0	0	0	0	0	0	0	0	0	0	0	0	0	0	0	0	0	0	0	0	0	0	0	0	0	0	0	0	0
	Proteobacteria_Epsilonproteobacteria_Campylobacterales_Campylobacteraceae_Campylobacter_gracilis	0	0	0	0	0	0	0	0	0	0	0	0	0	0	0	0	0	0	0	0	0	0	0	0	0	0	0	0	0	0	0	0	0	0	0	0	0	0	0	0	0	0	0	0	0	0	0	0
	Proteobacteria_Epsilonproteobacteria_Campylobacterales_Campylobacteraceae_Campylobacter_hominis	0	1.92E-05	0	0	0	0	0	0	0	9.13E-05	0	8.93E-05	0	0.000431584	0.000263169	0	8.21E-05	0	0	0	0	0	0	0	0	0	0	0	0	0	0	0	0	0	0	0.000433075	0	0.000458211	0	0	0	0	0	2.28E-05	0	0	0	0
	Proteobacteria_Epsilonproteobacteria_Campylobacterales_Campylobacteraceae_Campylobacter_jejuni	0	0	0	0	0	0	0	0	0	0	0	0	0	0	0	0	0	0	0	0	0	0	0	0	0	0	0	0	0	0	0	0	0	0	0	0	0	0	0	0	0	0	0	0	0	0	0	0
	Proteobacteria_Epsilonproteobacteria_Campylobacterales_Campylobacteraceae_Campylobacter_subantarcticus	0	0	0	0	0	0	0	0	0	0	0	0	0	0	0	0	0	0	0	0	0	0	0	0	0	0	0	0	0	0	0	0	0	0	0	0	0	0	0	0	0	0	0	0	0	0	0	0
	Proteobacteria_Epsilonproteobacteria_Campylobacterales_Campylobacteraceae_Campylobacter_upsaliensis	0	0	0	0	0	0	0	0	0	0	0	0	0	0	0	0.000122619	0	0	0	0	0	0	0	0	0	0	0	0	0	0	0	0	0	0	0	0	0	0	0	0	0	0	0	0	0	0	0	0
	Proteobacteria_Epsilonproteobacteria_Campylobacterales_Campylobacteraceae_Campylobacter_ureolyticus	0	0	0	0	0	0	0	0	0	0	0	0	0	0	0	0	0	0	0	0	0	0	0	0	0	0	0	0	0	0	0	0	0	0	0	0	0	0	0	0	0	0	0	0	0	0	0	0
	Bacteroidetes_Flavobacteriia_Flavobacteriales_Flavobacteriaceae_Capnocytophaga_gingivalis	0	0	0	0	0	0	0	0	0	0	0	0	0	0	0	0	0	0	0	0	0	0	0	0	0	0	0	0	0	0	0	0	0	0	0	0	0	0	0	0	0	0	0	0	0	0	0	0
	Bacteroidetes_Flavobacteriia_Flavobacteriales_Flavobacteriaceae_Capnocytophaga_leadbetteri	0	0	0	0	0	0	0	0	0	0	0	6.42E-05	0	0	0	0	0	0	0	0	0	0	0	0	0	0	0	0	0	0	0	0	0	0	0	0	0	0	0	0	0	0	0	0	0	0	0	0
	Bacteroidetes_Flavobacteriia_Flavobacteriales_Flavobacteriaceae_Capnocytophaga_sputigena	0	0	0	0	0	0	0	0	0	0	0	0	0	0	0	0	0	0	0	0	0	0	0	0	0	0	0	0	0	0	0	0	0	0	0	0	0	0	0	0	0	0	4.62E-05	0	0	0	0	0
	Proteobacteria_Gammaproteobacteria_Cardiobacteriales_Cardiobacteriaceae_Cardiobacterium_hominis	0	0	0	0	0	0	7.63E-05	0	0	0	5.03E-05	0	0	0	0	0	0	0	0	0	0	0	0	0	0	0	0	0	0	0	0	0	0	0	0	0	0	0	0	0	0	0	0	0	0	0	0	0.000141694
	Proteobacteria_Gammaproteobacteria_Cardiobacteriales_Cardiobacteriaceae_Cardiobacterium_sp.	0	0	0	0	0	0	0	0	0	0	0	0	0	0	0	0	0	0	0	0	0	0	0	0	0	0	0	0	0	0	0	0	0	0	0	0	0	0	0	0	0	0	0	0	0	0	0	0
	Proteobacteria_Gammaproteobacteria_Cardiobacteriales_Cardiobacteriaceae_Cardiobacterium_valvarum	0	0	0	0	0	0	0	0	0	0	0	0	0	0	0	0	0	0	0	0	0	0	0	0	0	0	0	0	0	0	0	0	0	0	0	0	0	0	0	0	0	0	0	0	0	0	0	0
	Proteobacteria_Betaproteobacteria_Burkholderiales_Alcaligenaceae_Castellaniella_sp.	0	0	0	0	0	0	0	0	0	0	0	0	0	0	0	0	0	0	0	0	0	0	0	0	0	0	0	0	0	0	0	0	0	0	0	0	0	0	0	0	0	0	0	0	0	0	0	0
Cluster3	Firmicutes_Erysipelotrichia_Erysipelotrichales_Erysipelotrichaceae_Catenibacterium_mitsuokai	0	0.013314154	0.008433019	8.60E-05	0.000435504	0.005917307	0.004894669	0.000184107	0.003940695	0.005318852	0.006105295	0.002349684	0.010787245	0.006845401	0.000679854	0.013099812	0.001278457	0	0.00487535	0.000381192	0.002789778	0.000571733	8.46E-05	6.31E-05	0.000843544	0.00024566	0	0	0.010054417	0.00048254	0.001843197	0	0.003434627	0.001981465	0.000591481	0.004021406	0.002403222	0.002612395	0.000722446	0.003253636	0.000144027	0	0.013938067	0.006591582	0.000461741	0.004937448	0.000433907	0.000952501
	Firmicutes_Clostridia_Clostridiales_Lachnospiraceae_Catonella_morbi	4.05E-05	0	0	0	0	0.000136744	0	0	0	0	0	0	0	0	0	0	0	0	0	0.000374839	0	0	6.04E-05	0	0	0	0	0	0	0	0	0	0	0	3.48E-05	0	0	0	0	0	0	0	0.000381232	5.47E-05	0	4.92E-05	0	0
	Proteobacteria_Alphaproteobacteria_Caulobacterales_Caulobacteraceae_Caulobacter_fusiformis	0	0	0	0	0	0	0	0	0	0	0	0	0	0	0	0	0	0	0	0	0	0	0	0	0	0	0	0	0	0	0	0	0	0	0	0	0	0	0	0	0	0	0	0	0	0	0	0
	Firmicutes_Clostridia_Clostridiales_Lachnospiraceae_Cellulosilyticum_ruminicola	0	0	0	0	0	0	0	0	0	0	0	0	0	0	0	0	0	0	0	0	0	0	0	0	0	0	0	0	0	0	0	0	0	0	0	0	0	0	0	0	0	0	0	0	0	0	0	0
	Proteobacteria_Gammaproteobacteria_Cellvibrionales_Cellvibrionaceae_Cellvibrio_fulvus	0	0	0	0	0	0	0	0	0	0	0	0	0	0	0	0	0	0	0	0	0	0	0	0	0	0	0	0	0	0	0	0	0	0	0	0	0	0	0	0	0	0	0	0	0	4.92E-05	0	0
	Proteobacteria_Gammaproteobacteria_Cellvibrionales_Cellvibrionaceae_Cellvibrio_gandavensis	0	0	0	0	0	0	0	0	0	0	0	0	0	0	0	0	0	0	0	0	0	0	0	0	0	0	0	0	0	0	0	0	0	0	0	0	0	0	0	0	0	0	0	0	0	0	0	0
	Firmicutes_Negativicutes_Selenomonadales_Selenomonadaceae_Centipeda_periodontii	0	0	0	0	0	0	0	0	0	0	0	0	0	0	0	0	0	0	0	0	0	0	0	0	0	0	0	0	0	0	0	0	0	0	0	0	0	0	0	0	0	0	0	0	0	0	0	0
	Fusobacteria_Fusobacteriia_Fusobacteriales_Fusobacteriaceae_Cetobacterium_somerae	0	0	0	0	0	0	0	0	0	0	0	0	0	0	0	0	0	0	0	0	0	0	0	0	0	0	0	0	0	0	0	0	0	0	0	0	0	0	0	0	0	0	0	0	0	0	0	0
	Firmicutes_Clostridia_Clostridiales_Christensenellaceae_Christensenella_minuta	0	0	0	0	0	0	0	0	0	0	0	0	0	0	0	0	0	0	0	0	0	0	0	0	0	0	0	0	0	0	0	0	0	0	0	0	0	0	0	0	0	0	0	0	0	0	0	0
	Bacteroidetes_Flavobacteriia_Flavobacteriales_Flavobacteriaceae_Chryseobacterium_gleum	0	0	0	0	0	0	0	0	0	0	0	0	0	0	0	0	0	0	0	0	0	0	0	0	0	0	0	0	0	0	0	0	0	0	0	0	0	0	0	0	0	0	0	0	0	0	0	0
	Bacteroidetes_Flavobacteriia_Flavobacteriales_Flavobacteriaceae_Chryseobacterium_haifense	0	0	0	0	0	0	0	0	0	0	0	0	0	0	0	0	0	0	0	0	0	0	0	0	0	0	0	0	0	0	0	0	0	0	0	0	0	0	0	0	0	0	0	0	0	0	0	0
	Bacteroidetes_Flavobacteriia_Flavobacteriales_Flavobacteriaceae_Chryseobacterium_hungaricum	0	0	0	0	0	0	0	0	0	0	0	0	0	0	0	0	0	0	0	0	0	0	0	0	0	0	0	0	0	0	0	0	0	0	0	0	0	0	0	0	0	0	0	0	0	0	0	0
	Proteobacteria_Gammaproteobacteria_Enterobacteriales_Enterobacteriaceae_Citrobacter_braakii	0	0	0	0	0	0	0	0	0	0	0	0	0	0	0	0	0	0	0	0	0	0	0	0	0	0	0	0	0	0	0	0	0	0	0	0	0	0	0	0	0	0	0	0	0	0	0	0
	Proteobacteria_Gammaproteobacteria_Enterobacteriales_Enterobacteriaceae_Citrobacter_freundii	0	0	0	0	0	0	0	0	0	0	0	0	0	0	0	0	0	0	0	0	0	0	0	0	0	0	0	0	0	0	0	0	0	0	0	0	0	0	0	0	0	0	0	0	0	0	0	0
	Proteobacteria_Gammaproteobacteria_Enterobacteriales_Enterobacteriaceae_Citrobacter_gillenii	0	0	0	0	0	0	0	0	0	0	0	0	0	0	0	0.00094008	0	0	0	0	0	0	0	0	0	0	0	0	0	0	0	0	0	0	0	0	0	0	0	0	0	0	0	0	0	0	0	0
	Proteobacteria_Gammaproteobacteria_Enterobacteriales_Enterobacteriaceae_Citrobacter_koseri	0	0	0	0	0	0	0	0	0	0	0	0	0	0	0	0	0	0	0	0	0	0	0	0	0	0	0	0	0	0	0	0	0	0	0	0	0	0	0	0	0	0	0	0	0	0	0	0
	Proteobacteria_Gammaproteobacteria_Enterobacteriales_Enterobacteriaceae_Citrobacter_murliniae	0	0	0	0	0	0	0	0	0	0	0	0	0	0	0	0	0	0	0	0	0	0	0	0	0	0	0	0	0	0	0	0	0	0	0	0	0	0	0	0	0	0	0	0	0	0	0	0
	Proteobacteria_Gammaproteobacteria_Enterobacteriales_Enterobacteriaceae_Citrobacter_sp.	0	0	0	0	0	0	0	0	0	0	0	0	0	0	0	6.13E-05	0	0	0	0	0	0	0	0	0	0	0	0	0	0	0	0	0	0	0	0	0	0	0	0	0	0	0	0	0	0	0	0
	Proteobacteria_Gammaproteobacteria_Enterobacteriales_Enterobacteriaceae_Citrobacter_youngae	0	0	0	0	0	0	0	0	0	0	0	0	0	0	0	0	0	0	0	0	0	0	0	0	0	0	0	0	0	0	0	0	0	0	0	0	0	0	0	0	0	0	0	0	0	0	0	0
	Synergistetes_Synergistia_Synergistales_Synergistaceae_Cloacibacillus_evryensis	0	0	0	0	0	0	0	0	0	0	0	0	0	0	0	0	0	0	0	0	0	0	0	0	0	0	0	0	0	0	0	0	0	0	0	0	0	0	0	0	0	0	0	0	0	0	0	0
	Synergistetes_Synergistia_Synergistales_Synergistaceae_Cloacibacillus_porcorum	0	0	0	0	0	0	0	0	0	0	0	0	0	0	0	0	0	0	0	0	0	0	0	0	0	0	0	0	0	0	0	0	0	0	0	0	0	0	0	0	0	0	0	0	0	0	0	0
	Bacteroidetes_Flavobacteriia_Flavobacteriales_Flavobacteriaceae_Cloacibacterium_normanense	0	0	0	0	0	0	0	0	0	0	0	0	0	0	0	0	0	0	0	0.00015883	0	0	0	0	0	0	0	0	0	0	0	0	0	0	0	0	0	0	0	0	0	0	0	0	0	0	0	0
	Firmicutes_Clostridia_Clostridiales_Clostridiaceae_Clostridium_aldenense	0	0.00013809	0	0	0	0	0	0	0	0	2.52E-05	0.000128368	0	0	0	0	0	0	0.000115036	0	0	0	0	0	0	0	0	0	0	0	9.06E-05	0	0	0	0	0	0	0	0	0	0	0	0	0	0	0	0	0
	Firmicutes_Clostridia_Clostridiales_Clostridiaceae_Clostridium_aminophilum	0	0	0	0	0	0	0	0	0	0	0	0	0	0	0	0	0	0	0	0	0	0	0	0	0	0	0	0	0	0	0	0	0	0	0	0	0	0	0	0	0	0	0	0	0	0	0	0
	Firmicutes_Clostridia_Clostridiales_Clostridiaceae_Clostridium_aurantibutyricum	0	0	0	0	0	0	0	0	0	0	0	0	0	0	0	0	0	0	0	0	0	0	0	0	0	0	0	0	0	0	0	0	0	0	0	0	0	0	0	0	0	0	0	0	0	0	0	0
Cluster3	Firmicutes_Clostridia_Clostridiales_Clostridiaceae_Clostridium_bartlettii	0.004972305	0.000537016	0	0.003581785	0.001859265	0	0.001080641	0.000242686	0.000717396	0.00151098	0.001067042	0.000664163	0.000689254	0.00038363	0.000350893	0.001369247	0.003718083	0.00032027	0.0004218	0.000527316	0.000197783	0.000139757	0	7.57E-05	0.000493259	0.000391236	0.006410487	0.000449567	0.001389198	0.001650794	0	0.002253912	0	0.006974132	0.003430591	0.003944072	0.001623798	0.006825553	0	0.00348037	0	0.006362727	0	0.001779043	5.39E-05	5.47E-05	0.001501986	0.00346364
	Firmicutes_Clostridia_Clostridiales_Clostridiaceae_Clostridium_bifermentans	0	0	0	0	0	0	0	0	0	0	0	0	0	0	0.000460547	0	0	0	0	3.18E-05	0	0	0	0	0	0	0	0	0	0	0	0	0	0	0	0	0	0	0	0.000181387	0	0	0	0	0	0	0	0
	Firmicutes_Clostridia_Clostridiales_Clostridiaceae_Clostridium_bolteae	0	0	0	0	0	0	0	0	0	0	0	0	0	0	0	8.17E-05	0	5.90E-05	0	0	0	0	0	0	0	0	0	0	0	0	0	0	0	0	0	0	0	0	0	0	0	0	0	0	0	0	0	0
	Firmicutes_Clostridia_Clostridiales_Clostridiaceae_Clostridium_butyricum	0	9.21E-05	0	0	0	0	0	0	4.48E-05	0	0	0	0	0	0	0	0	0	0	0	0	0	0	0	0	0	0	0	0	0	0	0	0	0	0	0	0	0	0	0	0	0	0	0	0	0	0.000178013	0.000125951
	Firmicutes_Clostridia_Clostridiales_Clostridiaceae_Clostridium_celatum	0	0.000180284	0	0	0	0.002349519	8.90E-05	0	0.000433427	0	0	0	0.000182694	0	0	0	0	7.59E-05	0	3.81E-05	0	0	0	0	0	0	0	0	0	0	0	0	0	0	0	0	0	0	0	0	0	0	0	0	0.002447227	0	0.001401854	0
	Firmicutes_Clostridia_Clostridiales_Clostridiaceae_Clostridium_chartatabidum	0	0	0	0	0	0	0	0	0	0	0	2.79E-05	0.00011626	2.80E-05	0	0	0	0	0	0	0	0	0	0	0	0	0	0	0	0	0	0	0	0	0	0	0	0	0	0	0	0.001411089	0	0	0	0	0	0
	Firmicutes_Clostridia_Clostridiales_Clostridiaceae_Clostridium_chromiireducens	0	0	0	0	0	0	0	0	0	0	0	0	0	0	0	0	0	0	0	0	0	0	0	0	0	0	0	0	0	0	0	0	0	0	0	0	0	0	0	0	0	0	0	0	0	0	0	0
	Firmicutes_Clostridia_Clostridiales_Clostridiaceae_Clostridium_citroniae	0	0	0	0	0	0	0	0	0	0	0	0	0	0	0	0	0	0	0	0	0	0	0	0	0	0	0	0	0	0	0	0	0	0	0	0	0	0	0	0	0	0	0	0	0	0	0	0
	Firmicutes_Clostridia_Clostridiales_Clostridiaceae_Clostridium_collagenovorans	0	0	0	0	0	0	0	0	0	0	0	0	0	0	0	0	0	0	0	0	0	0	0	0	0	0	0	0	0	0	0	0	0	0	0	0	0	0	0	0	0	0	0	0	0	0	0	0
	Firmicutes_Clostridia_Clostridiales_Clostridiaceae_Clostridium_difficile	0	0	0	0	0	0	0	0	0	0	0	0	0	0	0	0	0	0	0	0	0	0	0	0	0	0	0	0	0	0	0	0	0	0	0	0	0	0	0	0	0	0	0	0	0	0	0	0
Cluster4	Firmicutes_Clostridia_Clostridiales_Clostridiaceae_Clostridium_disporicum	0.001997018	0.006202532	0.004625158	0.000160464	0.00239527	4.35E-05	0.065753843	0	0.009525423	0.001921683	0.000120797	0.002062253	0.004152134	0.010869522	0	0.012834137	0.009148594	0.001466498	0.005483399	0.016073595	0.000926456	0.005590283	0.000870248	0.001110172	9.29E-05	0.000500419	0.034021434	0.000399615	0.003246579	0	0.002890697	0.000538671	0.001098059	0.008705963	0.006193157	0.004454481	0.004611587	0.003445506	0	0.005974447	0	0.006644944	0	3.65E-05	0.014691057	0.000147631	0.004572713	0.191602248
	Firmicutes_Clostridia_Clostridiales_Clostridiaceae_Clostridium_fallax	0	0	0	0	0	0	0	0	0	0	0	0	0	0	0	0	0	0	0	0	0	0	0	0	0	0	0	0	0	0	0	0	0	0	0	0	0	0	0	0	0	0	0	0	0	0	0	0
	Firmicutes_Clostridia_Clostridiales_Clostridiaceae_Clostridium_glycyrrhizinilyticum	0	0	0	0	0	0	0	0	2.49E-05	0	0	0	0	0	0	0	0	0	0	0	0	0	0	0	0.000228758	5.46E-05	0	0	8.44E-05	0	0.000110793	0	0	0	0	0	0	0	0	0	7.76E-05	0	0	0	0	0	0	0
	Firmicutes_Clostridia_Clostridiales_Clostridiaceae_Clostridium_hathewayi	0	4.99E-05	0	0	0	0	0	0	0	0	0.001082142	8.09E-05	0	0	0	0	0	0	0	0	0	0	0	0	0	0	0	0	0	0	0	0	0	0	0	0	0	0	0.003141801	0	0	0	0	0	0	0	0	0
	Firmicutes_Clostridia_Clostridiales_Clostridiaceae_Clostridium_hiranonis	0	0	0	0	0	0	0	0	0	0	0.00086068	0	0	0	0	0	0	0	0	0	0	0	0	0	0	0	0	0	0	0	0	0	0	0	0	0	0	0	0	0	0	0	0	0	0	0	0	0
	Firmicutes_Clostridia_Clostridiales_Clostridiaceae_Clostridium_indolis	0	0	0	0	0	0	0	0	0	0	0	0	0	0	0	0	0	0	0	0	0	0	0	0	0	0	0	0	0	0	0	0	0	0	0	0	0	0	0	0	0	0	0	0	0	0	0	0
	Firmicutes_Clostridia_Clostridiales_Clostridiaceae_Clostridium_innocuum	0	3.07E-05	0	0	0	0	0	0	0	0	0	0	0	0	0	0	0	0.000168563	0	0	0	0	0	0	0	0	0	0	0	0	0	0	0	0	0	0	0	0	0	0	0	0	0	0	0	0	0	0
	Firmicutes_Clostridia_Clostridiales_Clostridiaceae_Clostridium_intestinale	0	0	0	0	0	0	0	0	0	0	0	0	0	0	0	0	0	0.002300885	0	0	0	0	0	0	0	0	0	0	0	0	0	0	0	0	0	0	0	0	0	0	0	0	0	0	0	0	0	0
	Firmicutes_Clostridia_Clostridiales_Clostridiaceae_Clostridium_lactatifermentans	0	0	0	0	0	0	0	0	0	0	0	0	0	0	0	0	0	0	0	0	0	0	0	0	0	0	0	0	0	0	0	0	0	0	0	0	0	0	0.000436828	0	0	0	0	0	0	0	0	0
	Firmicutes_Clostridia_Clostridiales_Clostridiaceae_Clostridium_lavalense	0	0	0	0	0	0	0	0	0	0	0	0	0.000847035	0	0	0.004393853	0	0	0.000701174	0	0	0	0	0	0	0	0	0	0	0	0	0	0	0	0	0	0	0	0	0.000974957	0	0	0	0	0	0	0	0
	Firmicutes_Clostridia_Clostridiales_Clostridiaceae_Clostridium_leptum	0	0	0	0	0	0	0	0	0	0	0	0	0	0	0	0	0	0	0	0	0	0	0	0	0	0	0	0	0	0	0	0	0	0	0	0	0	0	0	0	0	0	0	0	0	0	0	0
	Firmicutes_Clostridia_Clostridiales_Clostridiaceae_Clostridium_litorale	0	0	0	0	0	0	0	0	0	0	0	0	0	0	0	0	0	0	0	0	0	0	0	0	0	0	0	0	0	0	0	0	0	0	0	0	0	0	0	0	0	0	0	0	0	0	0	0
	Firmicutes_Clostridia_Clostridiales_Clostridiaceae_Clostridium_lituseburense	0	0	0	0	0	0	0	0	0	0	0	0	0	0	0	0	0	0	0	0	0	0	0	0	0	0	0	0	0	0	0	0	0	0	0	0	0	0	0	0	0	0	0	0	0	0	0	0
	Firmicutes_Clostridia_Clostridiales_Clostridiaceae_Clostridium_maritimum	0	0	0	0	0	0	0	0	0	0	0	0	0	0	0	0	0	0	0	0	0	0	0	0	0	0	0	0	0	0	0	0	0	0	0	0	0	0	0	0	0	0	0	0	0	0	0	0
	Firmicutes_Clostridia_Clostridiales_Clostridiaceae_Clostridium_neonatale	0	4.60E-05	0	0	0	0	0.000750092	0	0	0.001211826	0	0	0	0	0	0	0	0	0	0	0	0	0	0	0	0	0	0	0	0	0	0	0	0	0	0	0	0	0	0	0	0	0	0	0	0	0	0
	Firmicutes_Clostridia_Clostridiales_Clostridiaceae_Clostridium_nexile	0.000728642	8.82E-05	0	0	0	0	0	0	0	0	0	0	0	0	0	0	0	0	0	0	0	0	0	0	0	0	0	0	0	0	0	0	0	0	0	0	0	0	0	0	0	0	0	0	0	0	0	0
	Firmicutes_Clostridia_Clostridiales_Clostridiaceae_Clostridium_paraputrificum	6.75E-05	1.92E-05	0	0	0	0	0	9.21E-05	8.97E-05	2.54E-05	0	4.19E-05	0	0	0	0	0.001982195	0	0	4.45E-05	0	0	0	0	0	0	0.000161836	0	0	0	0	0	0	0	0	0	0	0	0	0.000226734	0	0	0	0	0	0	0.002547813	0.001275249
Cluster4	Firmicutes_Clostridia_Clostridiales_Clostridiaceae_Clostridium_perfringens	0	6.52E-05	0.002758377	0	0.040803337	0	0.000241555	0	0.002789873	0.000598307	0.00028186	0	0.001569507	0.001610448	0	0.000143056	0.007225044	0	0	0.000127064	0.000218602	0.000165167	0	0	0	0.000127379	0.000962023	0.000174832	0.000115127	0	0.000543894	0.000184282	0	0	0.000368806	0	0	5.36E-05	0	0.000226734	0	0	0	4.11E-05	0	0	0.001590993	0.002361572
	Firmicutes_Clostridia_Clostridiales_Clostridiaceae_Clostridium_ramosum	0	0	0	0	0	0	0	0	0	0	0	0	0	0	0	0	0	0	0	0	0	0	0	0	0	0	0	0	0	0	0	0	0	0	0	0	0	0	0	0	0	0	0	0	0	0	0.000111258	0
	Firmicutes_Clostridia_Clostridiales_Clostridiaceae_Clostridium_rectum	0	0	0	0	0	0	0	0	0	0	0	0	0	0	0	0	0	0.000522545	0	0	0	0	0	0	0	0	0	0	0	0	0	0	0	0	0	0	0	0	0	0	0	0	0	0	0	0	0	0
	Firmicutes_Clostridia_Clostridiales_Clostridiaceae_Clostridium_saccharogumia	0	0	0	0	0	0	0	0	0	0	0	0	0	0	0	0	0	0	0	0	0	0	0	0	0	0	0	0	0	0	0	0	0	0	0	0	0	0	0	0	0	0	0	0	0	0	0	0
	Firmicutes_Clostridia_Clostridiales_Clostridiaceae_Clostridium_sartagoforme	0	0	0	0	0	0	0	0	0	0	0	0	0	0	0	0	0	0	0	0	0	0	0	0	0	0	0	0	0	0	0	0	0	0	0	0	0	0	0	0	0	0	0	0	0	0	0	0
	Firmicutes_Clostridia_Clostridiales_Clostridiaceae_Clostridium_scindens	0	0	0	0	0	0	0	0	0	0	0	0	0	0	0	0	0	0	0	0	0	0	0	0	0	0	0	0	0	0	0	0	0	0	0	0	0	0	0	0	0	0	0	0	0	0	0	0
	Firmicutes_Clostridia_Clostridiales_Clostridiaceae_Clostridium_septicum	0	0	0	0	0.001340011	0	0	0	0	0	0	0	0	0	0	0	0	0	0	0	0	0.000355745	0	0	0	0	0	0	0	0	0	0	0	0	0	0	0	0	0	0	0	0	0	0	0	0	0	0
	Firmicutes_Clostridia_Clostridiales_Clostridiaceae_Clostridium_sordellii	0	0	0	0	0	0	0	0	0	0	0	0	0	0	0	0	0.000105561	0	2.74E-05	3.18E-05	0	0	0	0	0	0	0	0	0	0	0	0	0	0	0	0	0	0	0	0	0	0	0	0	0	0	0	3.94E-05
Cluster4	Firmicutes_Clostridia_Clostridiales_Clostridiaceae_Clostridium_sp.	0	0.001660913	0.002349729	0.001180556	0.000159126	0	0.001080641	0	0.001110967	0.000638871	0.000870747	0	0.002350108	0.000479538	0	0.000102183	0.000328411	0.000994522	0	0.000527316	0.000197783	0.000698785	0	0.000302774	0.00151552	0.000172872	0.001465511	0	0	0.000673016	0.002135289	0	0.000178754	0.000312042	6.96E-05	0.002072571	0.000714471	0.000309441	0.000302419	0.004500675	0	0	0.00013863	3.65E-05	0.000754177	0.000781899	0.00535152	0
	Firmicutes_Clostridia_Clostridiales_Clostridiaceae_Clostridium_spiroforme	0	0	0	0	0	0	0	0	0	0	0	0	0	0	0	0	0	5.90E-05	0	0	0	0	0	0	0	0	0	0	0	0	0	0	0	0	0	0	0	0	0	0	0	0	0	0	0	0	0	0
	Firmicutes_Clostridia_Clostridiales_Clostridiaceae_Clostridium_sporosphaeroides	0	0	0	0	0	0	0	0	0	0	0	0	0	0	0	0	0	0	0	0	0	0	0	0	0	0	0	0	0	0	0	0	0	0	0	0	0	0	0	0	0	0	0	0	0	0	0	0
	Firmicutes_Clostridia_Clostridiales_Clostridiaceae_Clostridium_tertium	0	0	0	0	5.03E-05	0	0	0	0	0.001607318	0	0	0	0	0	0	0	0	0	0	0	0	0	0	0	0	0	0	0	0	0	0	0	0	0	0	0	0	0	0	0	0	0	0	0	0	0	0
	Firmicutes_Clostridia_Clostridiales_Clostridiaceae_Clostridium_vincentii	0	0	0	0	0	0	0	0	0	0	0	0	0	0	0	0	0	0	0	0	0	0	0	0	0	0	0	0	0	0	0	0	0	0	0	0	0	0	0	0	0	0	0	0	0	0	0	0
	Proteobacteria_Betaproteobacteria_Burkholderiales_Oxalobacteraceae_Collimonas_arenae	0	0	0	0	0	0	0	0	0	0	0	0	0	0	0	0	0	0	0	0	0	0	0	0	0	0	0	0	0	0	0	0	0	0	0	0	0	0	0	0	0	0	0	0	0	0	0	0
	Proteobacteria_Betaproteobacteria_Burkholderiales_Oxalobacteraceae_Collimonas_sp.	0	0	0	0	0	0	0	0	0	0	0	0	0	0	0	0	0	0	0	0	0	0	0	0	0	0	0	0	0	0	0	0	0	0	0	0	0	0	0	0	0	0	0	0	0	0	0	0
Cluster1	Actinobacteria_Coriobacteriia_Coriobacteriales_Coriobacteriaceae_Collinsella_aerofaciens	0.000465521	0.000437284	0.00205253	0.00220638	0.000711881	0	0.000114421	0.00038495	0.00049321	0.001313234	0.000563721	0.00056091	0.000755688	0.001226817	0.001886048	0.007040383	0.000445701	0.00259587	7.67E-05	0.00127064	0.000395566	0	0.0117967	0.003078204	0.000600489	0	0	0	0.002210437	0.004304762	0.000453245	0.00398333	0.016483657	0	0.001029873	0	0.000714471	0.001820941	0.006602823	0.000623519	0.004747344	0	0.001617347	0.007015815	5.39E-05	2.73E-05	0	0.00189713
	Actinobacteria_Coriobacteriia_Coriobacteriales_Coriobacteriaceae_Collinsella_intestinalis	0	0	0	0	0	0	0	0	0	0	0	0	0	0	0	0	0	0	0	0	0	0	0	0	0	0	0	0	0	0	0	0	0	0	0	0	0	0	0	0	0	0	0	0	0	0	0	0
	Actinobacteria_Coriobacteriia_Coriobacteriales_Coriobacteriaceae_Collinsella_stercoris	0	0	0	0	0	0	0	0	0	0	0	0	0	0	0	0	0	0	0	0	0	0	0	0	0	0	0	0	0	0	0	0	0	0	0	0	0	0	0	0	0	0	0	0	0	0	0	0
	Proteobacteria_Gammaproteobacteria_Alteromonadales_Colwelliaceae_Colwellia_aestuarii	0	0	0	0	0	0	0	0	0	0	0	0	0	0	0	0	0	0	0	0	0	0	0	0	0	0	0	0	0	0	0	0	0	0	0	0	0	0	0	0	0	0	0	0	0.001177439	0	0	0
	Proteobacteria_Betaproteobacteria_Burkholderiales_Comamonadaceae_Comamonas_aquatica	0	0	0	0	0	0	0	0	0	0	0	0	0	0	0	0	0	0	0	0	0	0	0	0	0	0	0	0	0	0	0	0	0	0	0	0	0	0	0	0	0	0	0	0	0	0	0	0
	Proteobacteria_Betaproteobacteria_Burkholderiales_Comamonadaceae_Comamonas_kerstersii	0	0	0	0	0	0	0	0	0	4.56E-05	0	0	0	0	0	0	0	0	0	0	0	0	0	0	0	0	0	0	0	0	0	0	0.000255363	0	0	0	0	0	0	0	0	0	0	0	0	0	0	0
	Proteobacteria_Betaproteobacteria_Burkholderiales_Comamonadaceae_Comamonas_sp.	0	0	0	0	0	0	0	0	0	0	0	0	0	0	0	0	0	0	0	0	0	0	0	0	0	0	0	0	0	0	0	0	0	0	0	0	0	0	0	0	0	0	0	0	0	0	0	0
	Proteobacteria_Betaproteobacteria_Burkholderiales_Comamonadaceae_Comamonas_terrae	0	0	0	0	0	0	0	0	0	0	0	0	0	0	0	0	0	0	0	0	0	0	0	0	0	0	0	0	0	0	0	0	0	0	0	0	0	0	0	0	0	0	0	0	0	0	0	0
	Firmicutes_Erysipelotrichia_Erysipelotrichales_Erysipelotrichaceae_Coprobacillus_cateniformis	0	0	0	0	0	0	0	0	0	0	0	0	0	0	0	0.009901496	0	0	0	0	0	0	0	0	0	0	0	0	0	0	0	0	0	0	0	0	0	0	0.000117608	0	0	0	0	0	0	0	0	0
Cluster2	Firmicutes_Clostridia_Clostridiales_Lachnospiraceae_Coprococcus_catus	0.00014168	0.000878404	0.000482948	0.001128979	0.000343378	0.000814251	0.000279695	0	0.000438409	0.000202816	5.54E-05	0.000119996	0.000431822	0.000171834	0	0.002973514	0.001501308	0.003784239	0.00068474	0.000184243	0.001878936	0	0.000350517	0.000126156	0	0.000336645	0.002724232	0	0.002279513	7.62E-05	0.002507957	0.002211386	0.000370276	0.001919056	0.000229634	0.000525876	0.002208366	0.000267785	0	0.000578172	0	0	0.000167511	0.000200713	0.001077395	0.001328682	8.90E-05	0
Cluster3	Firmicutes_Clostridia_Clostridiales_Lachnospiraceae_Coprococcus_comes	0	0.001561181	0.001894643	0.000108886	0.000979883	0.000205117	0.000279695	0	0	0.000603378	0.000307026	0	4.98E-05	0.00025975	0	0	0.001161168	0	0.000334153	0.000254128	0.000145735	0	0.000398864	6.31E-05	6.43E-05	0.000782473	0.00052147	7.49E-05	0.003476833	0	0.002296443	0.000708778	0.001736466	0.000936125	0	0.000572277	0.005001299	0.000517718	0	0	0.000343448	0	0.000144406	0.000136849	0.000715698	0.001055291	0.000200265	0
Cluster3	Firmicutes_Clostridia_Clostridiales_Lachnospiraceae_Coprococcus_eutactus	0.000816349	0.000207135	0.002201129	0.009536145	5.03E-05	0	0.000584818	0	0.001918038	0.000831546	0.003890678	0.001702265	0.002989537	0.002553538	0.003552787	0	0.007659015	0.00414665	0.004404249	0.002509514	0.002368188	0	0	0.000643395	0.000993666	4.55E-05	0	0.000686839	0.000529584	0.001879365	0.005469159	0.000283511	0.00020429	0	4.87E-05	0.000108269	0.003507405	0.003528817	0.000554435	0.005747713	0.000526252	0.002386023	0	0.001341125	0.014075402	6.01E-05	0	0.000645496
	Firmicutes_Clostridia_Clostridiales_Lachnospiraceae_Coprococcus_sp.	0	0	0	0	0	0	0	0	0	0	0	0	0	0	0	0	0	0	0	0	0	0	0	0	0	0	0	0	0	0	0	0	0	0	0	0	0	0	0	0	0	0	0	0	0	0	0	0
	Firmicutes_Clostridia_Thermoanaerobacterales_Thermodesulfobiaceae_Coprothermobacter_proteolyticus	0	0	0	0	0	0	0	0	0	0	0	0	0	0	0	0	0	0	0	0	0	0	0	0	0	0	0	0	0	0	0	0	0	0	0	0	0	0	0	0	0	0	0	0	0	0	0	0
	Actinobacteria_Actinomycetales_Corynebacterineae_Corynebacteriaceae_Corynebacterium_accolens	0	0	0	0	0	0	0	0	0	0	0	0	0	0	0	0	0	0	0	0	0	0	0	0	0	0	0	0	0	0	0	0	0	0	0	0	0	0	0	0	0	0	0	0	0	0	0	0
	Actinobacteria_Actinomycetales_Corynebacterineae_Corynebacteriaceae_Corynebacterium_amycolatum	0	0	0	0	0	0	0	0	0	0	0	0	0	0	0	0	0	0	0	0	0	0	0	0	0	0	0	0	0	0	0	0	0	0	0	0	0	0	0	0	0	0	0	0	0	0	0	0
	Actinobacteria_Actinomycetales_Corynebacterineae_Corynebacteriaceae_Corynebacterium_appendicis	0	0	0	0	0	0	0	0	0	0	0	1.67E-05	0	0	0	0	0	0	0	0	0	0	0	0	0	0	0	0	0	0	0	0	0	0	0	0	0	0	0	0	0	0	0	0	0	0	0	0
	Actinobacteria_Actinomycetales_Corynebacterineae_Corynebacteriaceae_Corynebacterium_aquatimens	0	0	0	0	0	0	0	0	0	0	0	0	0	0	0	0	0	0	0	0	0	0	0	0	0	0	0	0	0	0	0	0	0	0	0	0	0	0	0	0	0	0	0	0	0	0	0	0
	Actinobacteria_Actinomycetales_Corynebacterineae_Corynebacteriaceae_Corynebacterium_argentoratense	0	0	0	0	0	0	0	0	0	0	0	0	0	0	0	0	0	0	0	0	0	0	0	0	0	0	0	0	0	0	0	0	0	0	0	0	0	0	0	0	0	0	0	0	0	0	0	0
	Actinobacteria_Actinomycetales_Corynebacterineae_Corynebacteriaceae_Corynebacterium_coyleae	0	0	0	0	0	0	0	0	0	0	0	1.67E-05	0	0	0	0	0	0	0	0	0	0	0	0	0	0	0	0	0	0	0	0	0	0	0	0	0	0	0	0	0	0	0	0	0	0	0	0
	Actinobacteria_Actinomycetales_Corynebacterineae_Corynebacteriaceae_Corynebacterium_durum	0	2.69E-05	0	0	0	0	0	0	5.48E-05	0	0	0	0	0	0	0	0	0	0	0	0	0	0	0	0	0	0	0	0	0	0	0	0	0	0	0	0	0	0	0	0	0	0	0	0	0	0	0
	Actinobacteria_Actinomycetales_Corynebacterineae_Corynebacteriaceae_Corynebacterium_glaucum	0	0	0	0	0	0	0	0	0	0	0	0	0	0	0	0	0	0	0	0	0	0	0	0	0	0	0	0	0	0	0	0	0	0	0	0	0	0	0	0	0	0	0	0	0	0	0	0
	Actinobacteria_Actinomycetales_Corynebacterineae_Corynebacteriaceae_Corynebacterium_glucuronolyticum	0	0	0	0	0	0	0	0	0	0	0	0	0	0	0	0	0	0	0	0	0	0	0	0	0	0	0	0	0	0	0	0	0	0	0	0	0	0	0	0	0	0	0	0	0	0	0	0
	Actinobacteria_Actinomycetales_Corynebacterineae_Corynebacteriaceae_Corynebacterium_imitans	0	0	0	0	0	0	0	0	0	0	0	0	0	0	0	0	0	0	0	0	0	0	0	0	0	0	0	0	0	0	0	0	0	0	0	0	0	0	0	0	0	0	0	0	0	0	0	0
	Actinobacteria_Actinomycetales_Corynebacterineae_Corynebacteriaceae_Corynebacterium_jeikeium	0	0	0	0	0	0	0	0	0	0	0	0	0	0	0	0	0	0	0	0	0	0	0	0	0	0	0	0	0	0	0	0	0	0	0	0	0	0	0	0	0	0	0	0	0	0	0	0
	Actinobacteria_Actinomycetales_Corynebacterineae_Corynebacteriaceae_Corynebacterium_lipophiloflavum	0	0	0	0	0	0	0	0	0	0	0	0	0	0	0	0	0	0	0	0	0	0	0	0	0	0	0	0	0	0	0	0	0	0	0	0	0	0	0	0	0	0	0	0	0	0	0	0
	Actinobacteria_Actinomycetales_Corynebacterineae_Corynebacteriaceae_Corynebacterium_mastitidis	0	0	0	0	0	0	0	0	0	0	0	1.95E-05	0	0	0	0	0	0	0	0	0	0	0	0	0	0	0	0	0	0	0	0	0	0	0	0	0	0	0	0	0	0	0	0	0	0	0	0
	Actinobacteria_Actinomycetales_Corynebacterineae_Corynebacteriaceae_Corynebacterium_matruchotii	0	0	0	0	0	0	0	0	0	0	0	0	0	0	0	0	0	0	0	0	0	0	0	0	0	0	0	0	0	0	0	0	0	0	0	0	0	0	0	0	0	0	0	0	0	0	0	0
	Actinobacteria_Actinomycetales_Corynebacterineae_Corynebacteriaceae_Corynebacterium_propinquum	0	0	0	0	0	0	0	0	0	0	0	0	0	0	0	0	0	0	0	0	0	0	0	0	0	0	0	0	0	0	0	0	0	0	0	0	0	0	0	0	0	0	0	0	0	0	0	0
	Actinobacteria_Actinomycetales_Corynebacterineae_Corynebacteriaceae_Corynebacterium_pseudodiphtheriticum	0	0	0	0	0	0	0	0	0	0	0	0	0	0	0	0	0	0	0	0	0	0	0	0	0	0	0	0	0	0	0	0	0	0	0	0	0	0	0	0	0	0	0	0	0	0	0	0
	Actinobacteria_Actinomycetales_Corynebacterineae_Corynebacteriaceae_Corynebacterium_sp.	0	0	0	0	0	0	0	0	0	0	0	0	0	0	0	0	0	0	0	0	0	0	0	0	0	0	0	0	0	0	0	0	0	0	0	0	0	0	0	0	0	0	0	0	0	0	0	0
	Actinobacteria_Actinomycetales_Corynebacterineae_Corynebacteriaceae_Corynebacterium_testudinoris	0	0	0	0	0	0	0	0	0	0	0	0	0	0	0	0	0	0	0	0	0	0	0	0	0	0	0	0	0	0	0	0	0	0	0	0	0	0	0	0	0	0	0	0	0	0	0	0
	Actinobacteria_Actinomycetales_Corynebacterineae_Corynebacteriaceae_Corynebacterium_tuberculostearicum	0	0	0	0	0	0	0.001589178	0	0	0	0	3.63E-05	0	0	0	0	0	0	0	0	0	0.000228693	0	0	0	0	0	0	0	0	0	0	0	0	0	0	0	0	0	0	0	0	0	0	0	5.47E-05	0	0
	Proteobacteria_Gammaproteobacteria_Enterobacteriales_Enterobacteriaceae_Cronobacter_dublinensis	0	0	0	0	0	0	0	0	0	0	0	0	0	0	0	0	0	0	0	0	0	0	0	0	0	0	0	0	0	0	0	0	0	0	0	0	0	0	0	0	0	0	0	0	0	0	0	0
	Proteobacteria_Gammaproteobacteria_Enterobacteriales_Enterobacteriaceae_Cronobacter_malonaticus	0	0	0	0	0	0	0	0	0.000134512	0	0.000568754	0	0.000215911	0	0	0	0	0	0	0	0	0	6.04E-05	0	0	0	0	0	0.000161178	0	0	0	0	0	0	0	0	5.95E-05	0.000184812	0	0	0	0	0	0	0	0	0
	Proteobacteria_Gammaproteobacteria_Enterobacteriales_Enterobacteriaceae_Cronobacter_sakazakii	0	0	0	0	5.86E-05	0	0	0	0	0	0	1.40E-05	0	0	0	0	0	0	0	0	0	0	0	0	0	0	0	0	0	0	0	0	0	0	0	0	0	0	0	0	0	0	0	0	0	0	0	0
	Proteobacteria_Gammaproteobacteria_Enterobacteriales_Enterobacteriaceae_Cronobacter_turicensis	0	0	0	0	0	0	0	0	0	0	0	0	0	0	0	0	0	0	0	0	0	0	0	0	0	0	0	0	0	0	0	0	0	0	0	0	0	0	0	0	0	0	0	0	0	0	0	0
	Proteobacteria_Gammaproteobacteria_Enterobacteriales_Enterobacteriaceae_Cronobacter_universalis	0	0	0	0	0	0	0	0	0	8.62E-05	5.54E-05	0.001079962	0.000282345	0.000511507	0	0.003259626	0	0	0	0	0.000234216	0	0	0	0	0	0	0	0	0	0	0	0	0	0	0	0	0	0	0	0	0	0	0	0	0	0	0
	Proteobacteria_Alphaproteobacteria_Rhizobiales_Brucellaceae_Daeguia_caeni	0	0	0	0	0	0	0	0	0	0	0	0	0	0	0	0	0	0	0	0	0	0	0	0	0	0	0	0	0	0	0	0	0	0	0	0	0	0	0	0	0	0	0	0	0	0	0	0
	Deinococcus-Thermus_Deinococci_Deinococcales_Deinococcaceae_Deinococcus_caeni	0	0	0	0	0	0	0	0	0	0	0	0	0	0	0	0	0	0	0	0	0	0	0	0	0	0	0	0	0	0	0	0	0	0	0	0	0	0	0	0	0	0	0	0	0	0	0	0
	Deinococcus-Thermus_Deinococci_Deinococcales_Deinococcaceae_Deinococcus_ficus	0	0	0	0	0	0	0	0	0	0	0	4.19E-05	0	0	0	0	0	0	0	0	0	0	0	0	0	0	0	0	0	0	0	0	0	0	0	0	0	0	0	0	0	0	0	0	0	0.000158567	0	0
	Deinococcus-Thermus_Deinococci_Deinococcales_Deinococcaceae_Deinococcus_geothermalis	0	0	0	0	0	0	0	0	0	0	0	0	0	0	0	0	0	0	0	0	0	0	0	0	0	0	0	0	0	0	0	0	0	0	0	0	0	0	0	0	0	0	0	0	0	0	0	0
	Deinococcus-Thermus_Deinococci_Deinococcales_Deinococcaceae_Deinococcus_reticulitermitis	0	0	0	0	0	0	0	0	0	0	0	0	0	0	0	0	0	0	0	0	0	0	0	0	0	0	0	0	0	0	0	0	0	0	0	0	0	0	0	0	0	0	0	0	0	0	0	0
	Deinococcus-Thermus_Deinococci_Deinococcales_Deinococcaceae_Deinococcus_sp.	0	0	0	0	0	0	0	0	0	0	0	0	0	0	0	0	0	0	0	0	0	0	0	0	0	0	0	0	0	0	0	0	0	0	0	0	0	0	0	0	0	0	0	0	0	0	0	0
	Actinobacteria_Actinobacteria_Micrococcales_Dermabacteraceae_Dermabacter_hominis	0	0	0	0	0	0	0	0	0	0	0	0	0	0	0	0	0	0	0	0	0	0	0	0	0	0	0	0	0	0	0	0	0	0	0	0	0	0	0	0	0	0	0	0	0	0	0	0
	Proteobacteria_Deltaproteobacteria_Desulfobacterales_Desulfobacteraceae_Desulfotignum_toluenicum	0	0	0	0	0	0	0	0	0	0	0	0	0	0	0	0	0	0	0	0	0	0	0	0	0	0	0	0	0	0	0	0	0	0	0	0	0	0	0	0	0	0	0	0	0	0	0	0
Cluster4	Proteobacteria_Deltaproteobacteria_Desulfovibrionales_Desulfovibrionaceae_Desulfovibrio_D168	0.000951282	0.000318374	0.00952894	0.001593178	0	0	6.36E-05	0	0	0.000141971	0	0.000549748	0	0.001035002	0	0.004669746	0.001384018	0	5.48E-05	0.000127064	0	0	0	0	0.002737944	0	0	0	0	0	8.06E-05	0	0	0.000842513	0	0.001376558	0.000909327	0.002582642	0	0	0	0.044308182	0	0.000770919	0	0	0	0
	Proteobacteria_Deltaproteobacteria_Desulfovibrionales_Desulfovibrionaceae_Desulfovibrio_desulfuricans	0	0	0	0	0	0	0	0	0	0	0	0	0	0	0	0	0	0	0	0	0	0	0	0	0	0	0	0	0	0	0	0	0	0	0	0	0	0	0	0	0	0	0	0	0	0	0	0
	Proteobacteria_Deltaproteobacteria_Desulfovibrionales_Desulfovibrionaceae_Desulfovibrio_legallii	0	0	0	0	0	0	0	0	0	0	0	0	0	0	0	0	0	0	0	0	0	0	0	0	0	0	0	0	0	0	0	0	0	0	0	0	0	0	0	0	0	0	0	0	0	0	0	0
	Proteobacteria_Deltaproteobacteria_Desulfovibrionales_Desulfovibrionaceae_Desulfovibrio_oxamicus	0	0	0	0	0	0	0	0	0	0	0	0	0	0	0	0	0	0	0	0	0	0	0	0	0	0	0	0	0	0	0	0	0	0	0	0	0	0	0	0	0	0	0	0	0	0	0	0
Cluster2	Proteobacteria_Deltaproteobacteria_Desulfovibrionales_Desulfovibrionaceae_Desulfovibrio_piger	0.000242881	0.000145761	0.000677985	0	0	0	0.000839086	0	0	0.000212957	5.54E-05	5.58E-05	0	0.000587434	0.0002851	0.00023502	0	0	0.001610509	0.002750936	0.000301879	0.000114347	0.000229649	0	0.001372546	0	0.00280515	7.49E-05	0.000867289	0.000533333	0	0	0.005030644	0.000764502	0.000160048	0.002072571	0	0	0.008081317	0	0	0	0	0	0.001500658	0	0	0
	Proteobacteria_Deltaproteobacteria_Desulfovibrionales_Desulfovibrionaceae_Desulfovibrio_sp.	0	0	0	0	0	0	0	0	0	0	0	0	0	0	0	0	0	0	0	0	0	0	0	0	0	0	0	0	0	0	0	0	0	0	0	0	0	0	0	0	0	0	0	0	0	0	0	0
	Proteobacteria_Deltaproteobacteria_Desulfovibrionales_Desulfovibrionaceae_Desulfovibrio_vulgaris	0	0	0	0	0	0	0	0	0	0	0	0	0	0	0	0	0	0	0	0	0	0	0	0	0	0	0	0	0	0	0	0	0	0	0	0	0	0	0	0	0	0	0	0	0	0	0	0
	Proteobacteria_Alphaproteobacteria_Rhizobiales_Hyphomicrobiaceae_Devosia_albogilva	0	0	0	0	0	0	0	0	0	0	0	0	0	0	0	0	0	0	0	0	0	0	0	0	0	0	0	0	0	0	0	0	0	0	0	0	0	0	0	0	0	0	0	0	0	0.000678011	0	0
	Proteobacteria_Alphaproteobacteria_Rhizobiales_Hyphomicrobiaceae_Devosia_insulae	0	0	0	0	0	0	0	0	0	0	0	0	0	0	0	0	0	0	0	0	0	0	0	0	0	0	0	0	0	0	0	0	0	0	0	0	0	0	0	0	0	0	0	0	0	6.56E-05	0	0
	Firmicutes_Negativicutes_Veillonellales_Veillonellaceae_Dialister_invisus	0.000283361	9.97E-05	0	0	0	0	0	0	0	0	0	0.000217667	0.000971599	0.001170871	0	0.000194147	0	0	0.000202683	0	9.89E-05	0	0.001220765	0	0	0	0.000134863	0	0	0	0	0	0	0	0	0	0	0	0	0	0	0	0	0	0	0	0	0
	Firmicutes_Negativicutes_Veillonellales_Veillonellaceae_Dialister_pneumosintes	0	0	0	0	0	0	0	0	0	0	0	0	0	0	0	0	0	0	0	0	0	0	0	0	0	0	0	0	0	0	0	0	0	0	0	0	0	0	0	0	0	0	0	0	0	0	0	0
	Firmicutes_Negativicutes_Veillonellales_Veillonellaceae_Dialister_propionicifaciens	0	0	0	0	0	0	0	0	0	0	0	0	0	0	0	0	0	0	0	0	0	0	0	0	0	0	0	0	0	0	0	0	0	0	0	0	0	0	0	0	0	0	0	0	0	0	0	0
Cluster2	Firmicutes_Negativicutes_Veillonellales_Veillonellaceae_Dialister_succinatiphilus	0.000303601	0.005293441	0.009213166	0.001776565	0.000619755	0	0.005911743	0.004326505	0.000323825	0.007423069	0.001102275	1.95E-05	0.000589603	0.001035002	0.006337997	0.000286111	0	5.90E-05	0.000651873	6.99E-05	0.00069224	0.000965594	0.002187708	0	0.000679124	0	0	0.002522572	0.000437482	0	0.000261875	0	0.000127681	0.007957063	0	0	0	0	0.003578629	0	0.001639689	0	2.89E-05	9.12E-05	0.002485705	0.000185906	0	0.000873782
	Firmicutes_Erysipelotrichia_Erysipelotrichales_Erysipelotrichaceae_Dielma_fastidiosa	0	0	0	0	0	0	0	0	0	0	0	0	0	0	0	0	0	0	0	0	0	0	0	0	0	0	0	0	0	0	0	0	0	0	0	0	0	0	0	0	0	0	0	0	0	0	0	0
	Actinobacteria_Actinomycetales_Corynebacterineae_Dietziaceae_Dietzia_aerolata	0	0	0	0	0	0	0	0	0	0	0	0	0	0	0	0	0	0	0	0	0	0	0	0	0	0	0	0	0	0	0	0	0	0	0	0	0	0	0	0	0	0	0	0	0	0	0	0
	Firmicutes_Bacilli_Lactobacillales_Carnobacteriaceae_Dolosigranulum_pigrum	0	0	0	0	0	0	0	0	0	0	0.000110731	0	0	0	0	0	0	0	0	0	0	0	0	0	5.72E-05	0.000445827	0	0	0	0	0	0	0	0	0	0	0	0	0	0	0	0	0	0	0	0	0	0
	Firmicutes_Clostridia_Clostridiales_Lachnospiraceae_Dorea_Dorea	0	0	0	0	0	0	0	0	0	0	0	0	0	0	0	0	0	0	0	0	0	0	0	0	0	0	0	0	0	0	0	0	0	0	0	0	0	0	0	0	0	0	0	0	0	0	0	0
Cluster3	Firmicutes_Clostridia_Clostridiales_Lachnospiraceae_Dorea_formicigenerans	5.40E-05	0.000107403	0.000371499	0.000819512	0.000728631	0.00090127	0.000940794	0.002226016	6.97E-05	0.000167323	5.03E-05	8.37E-05	0	0.000367646	0.006316066	6.13E-05	0.000140748	0.001938475	0.001303745	0.000756031	0.000796336	6.35E-05	7.25E-05	0	0.000922179	7.28E-05	0.00031468	8.74E-05	0.002179736	0.000101587	0.000543894	0	0.000561798	0.000327644	0.000306179	0.000154669	0	0.000880716	0	0.000340101	9.97E-05	0.001770275	0.000242602	0.000260014	0.000607959	0.000306198	0.010302511	0
Cluster3	Firmicutes_Clostridia_Clostridiales_Lachnospiraceae_Dorea_longicatena	0.022749813	0.000598389	0.008841667	0.009513221	0.000753756	0.001212053	0.002466405	0.005439513	0.006023136	0.0110839	0.010856654	0.001889236	0.008196313	0.003612518	0.02258871	0.031135045	0.000961775	0.006624526	0.004771269	0.005393867	0.005969916	0.000279514	0.026421708	0.012968827	0.004017557	0.000391236	0.005025894	0.023889506	0.012932589	0.011860317	0.003374159	0.006336471	0.018181818	0.003557275	0.035426249	0.001067219	0.002078462	0.006789848	0.004586694	0.003718441	0.001235307	0.014367447	0.002345153	0.009926147	0.003009012	0.048275447	0.010413769	0.003337689
	Proteobacteria_Gammaproteobacteria_Lysobacteriales_Rhodanobacteraceae_Dyella_ginsengisoli	0	0	0	0	0	0	0	0	0	0	0	0	0	0	0	0	0	0	0	0	0	0	0	0	0	0	0	0	0	0	0	0	0	0	0	0	0	0	0	0	0	0	0	0	0	0	0	0
	Bacteroidetes_Bacteroidia_Bacteroidales_Porphyromonadaceae_Dysgonomonas_capnocytophagoides	0	0	0	0	0	0	0	0	0	0	0	0	0	0	0	0	0	0	0	0	0	0	0	0	0	0	0	0	0	0	0	0	0	0	0	0	0	0	0	0	0	0	0	0	0	0	0	0
	Actinobacteria_Coriobacteriia_Eggerthellales_Eggerthellaceae_Eggerthella_lenta	0	0	0	0	0	0	0	0	0	0	0	0	0	0	0	0	0	0	0	0	0	0	0	0	0	0	0	0	0	0	0	0	0	0	0	0	0	0	0	0	0	0	0	0	0	0	0	0
	Firmicutes_Erysipelotrichia_Erysipelotrichales_Erysipelotrichaceae_Eggerthia_catenaformis	0	0	0	0	0	0	0	0	0	0	0	0	0	0	0	0	0	0	0	0	0	0	0	0	0	0	0	0	0	0	0	0	0	0	0	0	0	0	0	0	0	0	0	0	0	0	0	0
	Bacteroidetes_Flavobacteriia_Flavobacteriales_Flavobacteriaceae_Empedobacter_brevis	0	0	0	0	0	0	0	0	0	0	0	0	0	0	0	0	0	0	0	0	0	0	0	0	0	0	0	0	0	0	0	0	0	0	0	0	0	0	0	0	0	0	0	0	0	0	0	0
	Actinobacteria_Coriobacteriia_Coriobacteriales_Coriobacteriaceae_Enorma_massiliensis	0	0	0	0	0	0	0	0	0	0	0	0	0	0	0	0	0	0	0	0	0	0	0	0	0	0	0	0	0	0	0	0	0	0	0	0	0	0	0	0	0	0	0	0	0	0	0	0
	Proteobacteria_Alphaproteobacteria_Rhizobiales_Rhizobiaceae_Ensifer_adhaerens	0	0	0	0	0	0	0	0	0	0	0	0	0	0	0	0	0	0	0	0	0	0	0	0	0	0	0	0	0	0	0	0	0	0	0	0	0	0	0	0	0	0	0	0	0	0	0	0
	Proteobacteria_Gammaproteobacteria_Enterobacteriales_Enterobacteriaceae_Enterobacter_aerogenes	0	0	0	0	0	0	0	0	0	0	8.56E-05	0	0	0	0	0	0	0	0	0	0	0	0	0	0	0	0	0	0	0	0	0	0	0	0	0	0	0	0	0	0	0	0	0	0	0	0	0.000102335
	Proteobacteria_Gammaproteobacteria_Enterobacteriales_Enterobacteriaceae_Enterobacter_cancerogenus	0	0	0	0	0	0	0	0	0	0	0	0	0	0	0	0	0.000410514	0.00013485	0	0	0	0	0	0	0	0	0	0	0	0	0	0	0	0	0	0	0	0	0	0	0	0	0	0	0	0	0	0
	Proteobacteria_Gammaproteobacteria_Enterobacteriales_Enterobacteriaceae_Enterobacter_cloacae	0	0	4.64E-05	0	0	0	0	0	0	0	0	0	0	0	0	0.005660917	0	0	0	0	0	0	0	0	0	0	0	0	0	0	0	0	0	0	0	0	0	0	0	0	0	0	0	0	0	0	0	0
	Proteobacteria_Gammaproteobacteria_Enterobacteriales_Enterobacteriaceae_Enterobacter_helveticus	0	0	0	0	0	0	0	0	0	0	0	0	0	0	0	0	0	0	0	0	0	0	0	0	0	0	0	0	0	0	0	0	0	0	0	0	0	0	0	0	0	0	0	0	0	0	0	0
	Proteobacteria_Gammaproteobacteria_Enterobacteriales_Enterobacteriaceae_Enterobacter_hormaechei	0	0	0	0	0	0	0	0	0	0	0	0	0	0	0	0	0	0	0	0	0	0	0	0	0	0	0	0	0	0	0	0	0	0	0	0	0	0	0	0	0	0	0	0	0	0	0	0
	Proteobacteria_Gammaproteobacteria_Enterobacteriales_Enterobacteriaceae_Enterobacter_kobei	0.00140331	0	0.001402407	0	0	0	0	0	0	0	0	0	0	0	0	0.012476498	0	0	0	0	0	0	0	0	0	0	0.000764224	0	0	0	0.001198582	0	0	0	0	0	0	0	0	0	0	0	0	0	0	0	0	0
	Proteobacteria_Gammaproteobacteria_Enterobacteriales_Enterobacteriaceae_Enterobacter_ludwigii	0	0	0	0	0	0	0	0	0	0	3.52E-05	0	0	0	0	0	0	0	0	0	0	0	0	0	0	0	0	0	0	0	0	0	0	0	0	0	0	0	0	0	0	0	0	0	0	0	0	0
	Proteobacteria_Gammaproteobacteria_Enterobacteriales_Enterobacteriaceae_Enterobacter_massiliensis	0	0	0	0	0	0	0	0	0	0	0	0	0	0	0	0	0	0	0	0	0	0	0	0	0	0	0	0	0	0	0	0	0	0	0	0	0	0	0	0	0	0	0	0	0	0	0	0
	Proteobacteria_Gammaproteobacteria_Enterobacteriales_Enterobacteriaceae_Enterobacter_mori	3.37E-05	0	0	0	0.002311519	0	0	0	0	6.08E-05	0	0	0	0	0	0	0	0	0	0	0	0	0	0	0	0	0	0	0	0	0	0	0	0	0	0	0	0	0	0	0	0	0	3.65E-05	0	0	0.000244768	0
	Proteobacteria_Gammaproteobacteria_Enterobacteriales_Enterobacteriaceae_Enterobacter_oryzendophyticus	0	0	0	0	0	0	0	0	0	0	0	0	0	0	0	0	0	0	0	0	0	0	0	0	0	0	0	0	0	0	0	0	0	0	0	0	0	0	0	0	0	0	0	0	0	0	0	0
	Proteobacteria_Gammaproteobacteria_Enterobacteriales_Enterobacteriaceae_Enterobacter_pulveris	0	0	0	0	0	0	0	0	0	0.001962246	3.02E-05	0	0	0	0	0	0	0	0	6.99E-05	0	0	0	0	0	0	0	0	0	0	0	0	0	0	0	0	0	0	0	0	0	0	0	0	0	0	0	0
	Proteobacteria_Gammaproteobacteria_Enterobacteriales_Enterobacteriaceae_Enterobacter_sacchari	0	0	0	0	0	0	0	0	0	0	0	0	0	0	0	0	0	0	0	0	0	0	0	0	0	0	0	0	0	0	0	0	0	0	0	0	0.000519615	0	0	0	0	0	0	0	0	0	0	0
	Proteobacteria_Gammaproteobacteria_Enterobacteriales_Enterobacteriaceae_Enterobacter_siamensis	0	0	0	0	0	0	0	0	0	0	0	0	0	0	0	0	0	0	0	0	0	0	0	0	0	0	0	0	0	0	0	0	0	0	0	0	0	0	0	0	0	0	0	0	0	0	0	0
	Proteobacteria_Gammaproteobacteria_Enterobacteriales_Enterobacteriaceae_Enterobacter_soli	0	0	0	0	0	0	0	0	0	0	0	0	0	0	0	0	0	0	0	0	0	0	0	0	0	0	0	0	0	0	0	0	0	0	0	0	0	0	0	0	0	0	0	0	0	0	0	0
	Proteobacteria_Gammaproteobacteria_Enterobacteriales_Enterobacteriaceae_Enterobacter_sp.	0	0	0	2.87E-05	0	0	0.000127134	0	0	0	0	4.46E-05	0	0	0	0.000245238	0	0	0	0	0	8.89E-05	0	0	0	0	0	0	0	0	5.04E-05	0	0	0	0	0	0	0	0	0.001813874	0	0	0	0	0	0	0	0
	Proteobacteria_Gammaproteobacteria_Enterobacteriales_Enterobacteriaceae_Enterobacter_turicensis	0	0	0	0	0	0	0	0	0	0	0	0	0	2.00E-05	0	0.000224802	0	0	0	0	0	0	0	0	0	0	0	0	0	0	0	0	0	0	0	0	0	0	0	0	0	0	0	0	0	0	0	0
	Firmicutes_Bacilli_Lactobacillales_Enterococcaceae_Enterococcus_avium	0	0	0	0	0	0	0	0	0	0	0	0	0	0	0	0	0	0	0	0	0	0	0	0	0	0	0	0	0	0	0	0	0	0	0	0	0	0	0	0	0	0	0	0	0	0	0	0
	Firmicutes_Bacilli_Lactobacillales_Enterococcaceae_Enterococcus_cecorum	0	0	0	0	0	0	0	0	0	0	0	0	0	0	0	0	0	0	0	0	0	0	0	0	0	0	0	0	0	0	0	0	0	0	0	0	0	0	0	0	0	0	0	0	0	0	0	0
	Firmicutes_Bacilli_Lactobacillales_Enterococcaceae_Enterococcus_durans	0	0	0	0	0	0	0	0	0	0	0	0	0	0	0	0	0	0	0	0	0	0	0	0	0	0	0	0	0	0	0	0	0	0	0	0	0	0	0	0	0	0	0	0	0	0	0	0
	Firmicutes_Bacilli_Lactobacillales_Enterococcaceae_Enterococcus_faecalis	0	0	0	0	0	0	0	0	0	0	0	0	0	0	0	0	0	0	0	0	0	0	0	0	0	0	0	0	0	0	0	0	0	0	0	0	0	0	0	0	0	0	0	0	0	0	0	0
Cluster1	Firmicutes_Bacilli_Lactobacillales_Enterococcaceae_Enterococcus_faecium	0	0	0	0	0	0	0	0	0	0	0	0	0	0	0	0	0	0	0	0	0	0	0	0	0	0	0	0	0	0	0	0	0	0	0	0	0	0	0	0	0	0	0	0	0	0	0	0
	Firmicutes_Bacilli_Lactobacillales_Enterococcaceae_Enterococcus_lactis	0	0	0	0	0	0	0	0	0	0	0	0	0	0	0	0	0	0	0	0	0	0	0	0	0	0	0	0	0	0	0	0	0	0	0	0	0	4.17E-05	0	0	0	0	0	0	0	0	0	0
	Firmicutes_Bacilli_Lactobacillales_Enterococcaceae_Enterococcus_malodoratus	0	0	0	0	0	0	0	0	0	0	0	0	0	0	0	0	0	0	0	0	0	0	0	0	0	0	0	0	0	0	0	0	0	0	0	0	0	0	0	0	0	0	0	0	0	0	0	0
	Firmicutes_Bacilli_Lactobacillales_Enterococcaceae_Enterococcus_sp.	0	0	0	0	0	0	0	0	0	0	0	0	0	0	0	0	0	0	0	0	0	0	0	0	0	0	0	0	0	0	0	0	0	0	0	0	0	0	0	0	0	0	0	0	0	0	0	0
	Firmicutes_Bacilli_Lactobacillales_Enterococcaceae_Enterococcus_viikkiensis	0	0	0	0	0	0	0	0	0	0	0	0	0	0	0	0	0	0	0	0	0	0	0	0	0	0	0	0	0	0	0	0	0	0	0	0	0	0	0	0	0	0	0	0	0	0	0	0
	Proteobacteria_Gammaproteobacteria_Enterobacteriales_Enterobacteriaceae_Erwinia_rhapontici	0	0	0	0	0	0	0	0	0	5.07E-05	7.05E-05	0	0	0	0	0	0	0	0	0	0	0	0	0	0	0	0	0	0	0	0	0	0	0	0	0	0	0	0	0	0	0	0	0	0	0	0	0
	Proteobacteria_Gammaproteobacteria_Enterobacteriales_Enterobacteriaceae_Erwinia_sp.	0	0	0	0	0	0	0	0	0	0	0	0	0.000863644	0	0	0	0	0	0	0	0	0	0	0	0	0	0	0	0	0	0	0	0	0	0	0	0	0	0	0	0	0	0	0	0	0	0	0
	Proteobacteria_Alphaproteobacteria_Sphingomonadales_Erythrobacteraceae_Erythromicrobium_ramosum	0	0	0	0	0	0	0	0	0	0	0	0	0	0	0	0	0	0	0	0	0	0	0	0	0	0	0	0	0	0	0	0	0	0	0	0	0	0	0	0	0	0	0	0	0	0	0	0
	Proteobacteria_Gammaproteobacteria_Enterobacteriales_Enterobacteriaceae_Escherichia_albertii	0	0	0	0	0	0	0	0	0	0	0	0	0	0	0	0	0	0	0	0	0	0	0	0	0	0	0	0	0	0	0	0	0	0	0	0	0	0	0	0	0	0	0	0	0	0	0	0
Cluster4	Proteobacteria_Gammaproteobacteria_Enterobacteriales_Enterobacteriaceae_Escherichia_coli	0.018229536	0.000157269	0.003324913	0.003530207	0.000762131	0.000752095	0.003547046	0.000694584	0.064182019	0.008878275	0.006321723	0.004213805	0.004409567	0.003956186	0.002412387	0.018045451	0.004105138	0.010636325	0.00044919	0.001505708	0.004356425	0.010672359	0.000193389	0	0.000200163	0.014075409	0.005592318	0	0	0	0.000181298	0.015394647	0.000663943	0	4.87E-05	0	0	0.000142819	0	0.000578172	0.000138487	0.000282218	0.00018484	9.12E-05	7.70E-05	0.008650103	0.004583839	0.008800793
	Proteobacteria_Gammaproteobacteria_Enterobacteriales_Enterobacteriaceae_Escherichia_sp.	0	0	0	0	0	0	0	0	0	0	0	0	0	0	0	0	0	0	0	0.000114358	2.60E-05	0	0	0	0	0	0	0	0	0	0	0	0	0	0	0	0	0	0	0	0	0	0	0	0	0	0	0
	Proteobacteria_Gammaproteobacteria_Enterobacteriales_Enterobacteriaceae_Escherichia_vulneris	0	0	0	0	0	0	0	0	0	0	0	0	0	0	0	0	0	0	0	0	0	0	0	0	0	0	0	0	0	0	0	0	0	0	0	0	0	0	0	0	0	0.000128281	0	0	0	0	0	0
	Proteobacteria_Gammaproteobacteria_Enterobacteriales_Enterobacteriaceae_Escherichia_coli/dysenteriae	0	0	0	0	0	0	0	0	0	0.000167323	0	0	0	0	0	0	0	0	8.22E-05	0	0	0	0	0	0	0	0	0	0	0	0	0	0	0	0	0	0	0	0	0	0	0	0	0	0	0	0	0
Cluster0	Firmicutes_Clostridia_Clostridiales_Eubacteriaceae_Eubacterium_biforme	0.000222641	0.002604526	0.003064864	0	0	0.006128639	0.005377779	0.009130013	0.000318843	0.004101956	0.001202939	0.001286466	0.004193656	0.00631791	0	8.17E-05	0.003600793	0.000219132	0.004535719	0.000851329	0.005111123	0.00102912	0.000701033	0.000164003	0.001987333	0.001064527	0.005484428	0.016733894	0.002264163	0.002514286	0.000926635	0.002976866	0.051787538	0.004072144	0.00757096	0.003387261	0.05871655	0.004111994	0.000100806	0.001485109	0	0.000307874	0.009068697	0.004497785	0.002039356	0.000191374	0.000767682	9.45E-05
	Firmicutes_Clostridia_Clostridiales_Eubacteriaceae_Eubacterium_brachy	0	0	0	0	0	0	0	0	0	0	0	0	0	0	0	0	0	0	0	0	0	0	0	0	0	0	0	0	0	0	0	0	0	0	0	0	0	0	0	0	0	0	0	0	0	7.11E-05	0	0
	Firmicutes_Clostridia_Clostridiales_Eubacteriaceae_Eubacterium_callanderi	0	0	0	0	0	0	0	0	0	0	0	0	0	0	0	0	0	0	0	0	0	0	0	0	0	0	0	0	0	0	0	0	0	0	0	0	0	0	0	0	0	0	0	0	0	0	0	0
	Firmicutes_Clostridia_Clostridiales_Eubacteriaceae_Eubacterium_coprostanoligenes	0	0	0.000947321	0	0	0	0	0	0	0.000826476	0	0	0	0.000115888	0	0.000132837	0	0	0.000175293	0	0	0	0	0	0.000221609	0	0	0	0	0	0	0	0	0	8.35E-05	0	0	0	0	0	0	0	0	0	0	3.28E-05	0	0
	Firmicutes_Clostridia_Clostridiales_Eubacteriaceae_Eubacterium_dolichum	0	0	0	0	0	0	0	0	0	0	0	0	0	0	0	0	0	0	0	0	0	0	0	0	0	0	0	0	0	0	0	0	0	0	0	0	0	0	0	0	0	0	0	0	0	0	0	0
Cluster1	Firmicutes_Clostridia_Clostridiales_Eubacteriaceae_Eubacterium_eligens	0.031547487	0.011442271	0.009603239	0.016906025	0.002613022	0.020878397	0.013221964	0.011581978	0.015688052	0.023404978	0.019941615	0.001423206	0.015910978	0.014693835	0.022983464	0.010340881	0.016092143	0.027408344	0.013705759	0.00839893	0.008327695	0.043311989	0.04704176	0.017724904	0.013768354	0	0.009782061	0.00018732	0.018105625	0.004342857	0.017142742	0.012729644	0.000153218	0.007067744	0.017313005	0.004655551	0.075539101	0.032265167	0.0203125	0.055776621	0.011422431	0.009595402	0.003015197	0.013356507	0.012874876	0	0.036514948	0.00288899
Cluster3	Firmicutes_Clostridia_Clostridiales_Eubacteriaceae_Eubacterium_hadrum	0.0001012	0.002543153	0.003427075	0.00803466	0.001457262	0.00443798	0.001233202	0	0.002485976	0.00038028	0.000916046	0.000220457	0.001021425	0.000495522	0.001644809	0.002912205	0.000480888	0.000387695	0.00123801	0.000603554	0.000817155	0.006200132	0.000821901	0	0	0.000118281	0.007867007	0	0.002225787	6.35E-05	0.000463317	0.00025516	0.000280899	0.000483665	3.48E-05	0	0.003182645	0.000779553	0	0.000249408	7.20E-05	0	8.66E-05	4.56E-05	0.001008134	0.000667075	0.000278146	0.000125951
Cluster3	Firmicutes_Clostridia_Clostridiales_Eubacteriaceae_Eubacterium_hallii	0.003818622	0.000655926	0	0.000830974	0.001608013	0.00934835	0.002555399	0.000652742	0.001006347	0.000202816	0.002315281	0.000276269	0.002408238	0.001178864	0	0.000143056	0.000950046	0	0.001084628	0.00079415	0.000458023	0	0	0	0.000121528	0	8.99E-05	6.24E-05	0.00031468	0	0.000493534	0.000793831	0.001098059	0	0.003611515	0.000170136	0.00032476	0.02298789	0	0	0.000204961	0.000692716	0.000294588	0.000615823	0.000838829	0.002061371	0	6.30E-05
	Firmicutes_Clostridia_Clostridiales_Eubacteriaceae_Eubacterium_pyruvativorans	0	0	0	0	0	0	0	0	0	0	0	0	0	0	0	0	0	0	0	0	0	0	0	0	0	0	0	0	0	0	0	0	0	0	0	0	0	0	0	0	0	0	0	0	0	0	0	0
Cluster3	Firmicutes_Clostridia_Clostridiales_Eubacteriaceae_Eubacterium_ramulus	0	0.000268508	0	0.000108886	0	0.000242411	0.000546677	0.000644373	0	0.000136901	0	0.000295803	0.000290649	0.00022778	0	0	9.38E-05	0	4.93E-05	0.000374839	0	0	0.000688947	0	0.00016442	0	4.50E-05	0	0.000383756	0	0.000594255	0	0.000191522	0.000592879	0	0.000108269	0	9.52E-05	0	0	0	0	0	0	0.000754177	0.000366344	0.000111258	0.000244029
	Firmicutes_Clostridia_Clostridiales_Eubacteriaceae_Eubacterium_rectale	0	0	0	0	0	0	0	0	0	0	0	0	0	0	0	0	0	0	0	0	0	0	0	0	0	0	0	0	0	0	0	0	0	0	0	0	0	0	0	0	0	0	0	0	0	0	0	0
	Firmicutes_Clostridia_Clostridiales_Eubacteriaceae_Eubacterium_ruminantium	0	0	0	0	0	0	0	0	2.49E-05	0	0	0	0	0	0	0	0	0	0	0	0	0	0	0	0	0	0	0	0	0	0	0	0	0	0	0	0	0	0	0	0	0	0	0	0	0	0	0
	Firmicutes_Clostridia_Clostridiales_Eubacteriaceae_Eubacterium_saphenum	0	0	0	0	0	0	0	0	0	0	0	0	0	0	0	0	0	0	0	0	0	0	0	0	0	0	0	0	0	0	0	0	0	0	0	0	0	0	0	0	0	0	0	0	0	0	0	0
Cluster2	Firmicutes_Clostridia_Clostridiales_Eubacteriaceae_Eubacterium_siraeum	0.012056321	9.21E-05	0.000780147	0.003140509	0.001130634	0.005339251	0	0	0.001653996	0.000304224	0.000956312	0.000237201	0.000340475	0.000519499	0.001140401	0.004077087	0.001231542	9.27E-05	0.000405366	0.000603554	0.000530891	0.004891498	0.000132955	0.005878865	0.000386029	0.012028242	0.003245702	0	0.001043817	0.000114286	0	0.002083806	0.000319203	0	0.002936531	0.000587744	0.002598077	0.004873695	0	0.002539423	0	0.005618698	0.002402916	0.004703059	0.000531002	0.003078387	0	3.94E-05
	Firmicutes_Clostridia_Clostridiales_Eubacteriaceae_Eubacterium_sp.	0	0	0	0	0	0	0	0	0	0	0	0	0	0	0	0	0	0	0	0	0	0	0	0	0	0	0	0	0	0	0	0	0	0	0	0	0	0	0	0	0	0	0	0	0	0	0	0
	Firmicutes_Clostridia_Clostridiales_Eubacteriaceae_Eubacterium_sulci	0	0	0	0	0	0	0	0	0	0	0	0	0	0	0	0	0	0	0	0	0	0	0	0	0	0	0	0	0	0	0	0	0	0	0	0	0	0	0	0	0	0	0	0	0	0	0	0
	Firmicutes_Clostridia_Clostridiales_Eubacteriaceae_Eubacterium_tarantellae	0	0	0	0	0	0	0	0	0	6.59E-05	0	0	0	0	0	0	0	0	0	0	0	0	0	0	0	0	0	0	0	0	0	0	0	0	0	0	0	0	0	0	0	0	0	0	0	0	0	0
	Firmicutes_Clostridia_Clostridiales_Eubacteriaceae_Eubacterium_tenue	0	0	0	0	0	0	0	0	0	0	0	0	0	0	0	0	0	0	0	0	0	0	0	0	0	0	0	0	0	0	0	0	0	0	0	0	0	0	0	0	0	0	0	0	0	0	0	0
Cluster0	Firmicutes_Clostridia_Clostridiales_Eubacteriaceae_Eubacterium_ventriosum	0	0.000291523	0.002628353	0	0	0	0.001017074	0	7.47E-05	0.005212374	0	0.000440915	0	0	0	0	0	0	0.000427278	0	0	0.000139757	0	0.012047889	0	0	0	0.00785494	0	0	0	0	0	0.000858115	0.000681943	0	0	0.000101163	0	0.00010203	0	0	3.47E-05	0	6.93E-05	0	0	0.001007604
	Firmicutes_Clostridia_Clostridiales_Eubacteriaceae_Eubacterium_xylanophilum	0	0	0	0	0	0	0	0	0	0	0	0	0	0	0	0	0	0	0	0	0	0	0	0	0	0	0	0	0	0	0	0	0	0	0	0	0	0	0	0	0	0	0	0	0	0	0	0
	Firmicutes_Bacilli_Lactobacillales_Aerococcaceae_Facklamia_hominis	0	0	0	0	0	0	0	0	0	0	0	0	0	0	0	0	0	0	0	0	0	0	0	0	0	0	0	0	0	0	0	0	0	0	0	0	0	0	0	0	0	0	0	0	0	0	0	0
	Firmicutes_Bacilli_Lactobacillales_Aerococcaceae_Facklamia_ignava	0	0	0	0	0	0	0	0	0	0	0	0	0	0	0	0	0	0	0	0	0	0	0	0	0	0	0	0	0	0	0	0	0	0	0	0	0	0	0	0	0	0	0	0	0	0	0	0
	Firmicutes_Bacilli_Lactobacillales_Aerococcaceae_Facklamia_languida	0	0	0	0	0	0	0	0	0	0	0	0	0	0	0	0	0	0	0	0	0	0	0	0	0.000157271	0	0	0	0	0	0	0	0	0	0	0	0	0	0	0	0	0	0	0	0	0	0	0
Cluster1	Firmicutes_Clostridia_Clostridiales_Ruminococcaceae_Faecalibacterium_prausnitzii	0.238488473	0.068039893	0.192064789	0.181960411	0.258454632	0.201231944	0.171694827	0.077893821	0.136813367	0.165158222	0.118346084	0.088724306	0.136513868	0.079555309	0.112833896	0.145007357	0.251375221	0.259199326	0.13147011	0.092191282	0.11581221	0.232593891	0.15393727	0.165705779	0.140328553	0.084033919	0.115874272	0.078536908	0.281715544	0.158069841	0.238094758	0.120704808	0.173646578	0.129856149	0.104086788	0.055572741	0.103533385	0.149674194	0.200336022	0.223038465	0.102602453	0.098340047	0.011731543	0.174181982	0.228731059	0.169529986	0.121716492	0.085528284
	Firmicutes_Clostridia_Clostridiales_Peptostreptococcaceae_Filifactor_alocis	0	0	0	0	0	0	0	0	0	0	2.52E-05	0	0	0	0	0	0	0	0	0	0	0	0	0	0	0	0	0	0	0	0	0	0	0	0	0	0	0	0	0	0	0	0	0	0	0	0	0
	Firmicutes_Tissierellia_Tissierellales_Peptoniphilaceae_Finegoldia_magna	0	0	0	0	0	0	0	0	0	0.000116619	0	0	0	0	0	0	0	0	0	0.000203302	0	0	0	0	0	0	0	0	0	0	0	0	0	0	0	0	0	0	0	0	0	0	0	0	0	0	0	0
	Bacteroidetes_Sphingobacteriia_Sphingobacteriales_Chitinophagaceae_Flavisolibacter_sp.	0	0	0	0	0	0	0	0	0	0	0	0	0	0	0	0	0	0	0	0	0	0	0	0	0	0	0	0	0	0	0	0	0	0	0	0	0	0	0	0	0	0	0	0	0	0	0	0
	Bacteroidetes_Flavobacteriia_Flavobacteriales_Flavobacteriaceae_Flavobacterium_segetis	0	0	0	0	0	0	0	0	0	0	0	0	0	0	0	0	0	0	0	0	0	0	0	0	0	0	0	0	0	0	0	0	0	0	0	0	0	0	0	0	0	0	0	0	0	0	0	0
Cluster0	Firmicutes_Clostridia_Clostridiales_Clostridiales_Flavonifractor_plautii	8.10E-05	0.00115842	0	0	0.000226127	0.000497253	0.000394116	0	0.00059783	0.000603378	0	0	0.000473343	0.00087116	0	0.001829069	0.00011729	0.003345976	0.00015886	6.99E-05	0.000192578	0	0	0	0.00048611	0	0	0	0.003100751	0	0.002407236	0	0.000140449	0.000234031	3.48E-05	0.000680546	0	0.004421435	0	0.001893231	6.09E-05	0	0	9.58E-05	6.16E-05	0	0.004161057	0
	Proteobacteria_Gammaproteobacteria_Lysobacteriales_Rhodanobacteraceae_Frateuria_sp.	0	0	0	0	0	0	6.36E-05	0	0	0	0	0	0	0	0	0	0	0	0	0	0	0	0	0	0	0	0	0	0	0	0	0	0	0	0	0	0	0	0	0	0	0	0	0	0	0	0	0
	Synergistetes_Synergistia_Synergistales_Synergistaceae_Fretibacterium_fastidiosum	0	0	0	0	0	0	0	0	0	0	0	0	0	0	0	0	0	0	0	0	0	0	0	0	0	0	0	0	0	0	0	0	0	0	0	0	0	0	0	0	0	0	0	0	0	0	0	0
	Firmicutes_Clostridia_Clostridiales_Clostridiales_Fusibacter_paucivorans	0	0	0	0	0	0	0	0	0	0	0	0	0	0	0	0	0	0	0	0	0	0	0	0	0	0	0	0	0	0	0	0	0	0	0	0	0	0	0	0	0	0	0	0	0	0	0	0
	Firmicutes_Clostridia_Clostridiales_Clostridiales_Fusibacter_sp.	0	0	0	0	0	0	0	0	0	0	0	0	0	0	0	0	0	0	0	0	0	0	0	0	0	0	0	0	0	0	0	0	0	0	0	0	0	0	0	0	0	0	0	0	0	0	0	0
	Fusobacteria_Fusobacteriia_Fusobacteriales_Fusobacteriaceae_Fusobacterium_equinum	0	0	0	0	0	0	0	0	0	0	0	0	0	0	0	0	0	0	0	0	0	0	0	0	0	0	0	0	0	0	0	0	0	0	0	0	0	0	0	0	0	0	0	0	0	0	0	0
	Fusobacteria_Fusobacteriia_Fusobacteriales_Fusobacteriaceae_Fusobacterium_gonidiaformans	0	0	0	0	0	0	0	0	0	0.000167323	0	0	0	0	0	0	0	0	0	0	0	0	0	0	0	0	0	0	0	0	0	0	0	0	0	0	0	0	0	0	0	0	0	0	0	0	0	0
	Fusobacteria_Fusobacteriia_Fusobacteriales_Fusobacteriaceae_Fusobacterium_mortiferum	0	0	0.001476707	0	0	0	0	0	0	4.06E-05	0	0	9.13E-05	0	0	0	0	0.004576485	0	0	0	0	0	0	0	0	0	0	0	0	0.00123887	0	0	0	0	0	0	0	0	0	0	0	0	0	0	0	0	0
	Fusobacteria_Fusobacteriia_Fusobacteriales_Fusobacteriaceae_Fusobacterium_necrogenes	0.000431788	4.22E-05	0	0	0	0	0	0	0	0	0	0	0.000788905	0	0	0	0	0	0	0	0	0	0	0	0	0	0	0	0	0	0.000342452	0	0	0	0	0	0.000714471	0	0	0	0	0	0	0.000200713	0	0	0.001201589	0
	Fusobacteria_Fusobacteriia_Fusobacteriales_Fusobacteriaceae_Fusobacterium_periodonticum	0	7.67E-05	0	0	0	0	0	0	0	2.54E-05	0	0	0	0	0	0	0	0.000168563	0	0	0	0	0	0	0	0	0	0	0	0	0	0	0	0	0	0	0	0	0	0	0	0	0	0	0	0	0	0
	Fusobacteria_Fusobacteriia_Fusobacteriales_Fusobacteriaceae_Fusobacterium_russii	0	0	0	0	0	0	0	0	0	0	0	0	0	0	0	0	0	0	0.000334153	0	0	0	0	0	0	0	0	0	0	0	0	0	0	0	0	0	0	0	0	0	0	0	0	0	0	0	0	0
	Fusobacteria_Fusobacteriia_Fusobacteriales_Fusobacteriaceae_Fusobacterium_sp.	0	0	0	0	0	0	0	0	0	5.58E-05	0.001414335	0	0.012290317	0	0	0	0	0	0	0	0	0	0	0	0	0	0	0	0	0	0	0	0	0	0	0	0	0	0	0	0	0	0	0	0	0	0	0
	Fusobacteria_Fusobacteriia_Fusobacteriales_Fusobacteriaceae_Fusobacterium_ulcerans	0	0	0	0	0	0	0	0	0	0	0	1.67E-05	0	0	0	0	0	0	0	0	0	0	0	0	0	0	0	0	0	0	0	0	0	0	0	0	0	0	0	0	0	0	0	0	0	0	0	0
	Fusobacteria_Fusobacteriia_Fusobacteriales_Fusobacteriaceae_Fusobacterium_varium	0	0	0	0	0	0	0	0	0	0	0	0	0	0	0	0	0	0	0	0	0	0	0	0	0	0	0	0	0	0	0	0	0	0	0	0	0	0	0	0	0	0	0	0	0	0	0	0
	Proteobacteria_Gammaproteobacteria_Pasteurellales_Pasteurellaceae_Gallibacterium_anatis	0	0	0	0	0	0	0	0	0	0	0	0	0	0	0	0	0	0	0	0	0	0	0	0	0	0	0	0	0	0	0	0	0	0	0	0	0	0	0	0	0	0	0	0	0	0	0	0
	Actinobacteria_Actinobacteria_Bifidobacteriales_Bifidobacteriaceae_Gardnerella_vaginalis	0	0	0	0	0	0	0	0	0	0	0	0	0	0	0	0	0	0	0	0	0	0	0	0	0	0	0	0	0	0	0	0	0	0	0	0	0	0	0	0	0	0	0	0	0	0	0	0
	Firmicutes_Bacill_Bacillales_Bacillales_Gemella_morbillorum	0	0	0	0	0	0	0	0	0	0	0	0	0	0	0	0	0	0	0	0	0	0	0	0	0	0	0	0	0	0	0	0	0	0	0	0	0	0	0	0	0	0	0	0	0	0	0	0
	Firmicutes_Bacill_Bacillales_Bacillales_Gemella_palaticanis	0	0	0	0	0	0	0	0	0	0	0	0	0	0	0	0	0	0	0	0	0	0	0	0	0	0	0	0	0	0	0	0	0	0	0	0	0	0	0	0	0	0	0	0	0	0	0	0
Cluster1	Firmicutes_Bacill_Bacillales_Bacillales_Gemella_sanguinis	0	0.000360568	0	0	0	0	0	0	0	0	0	0	0	0	0	0	0	0	0	0	0	0	0	0	0	0	0	0	0	0	0	0	0	0	0	0	0	0	0	0	0	0	0	0	0	0	0	0
Cluster3	Proteobacteria_Alphaproteobacteria_Rhizobiales_Hyphomicrobiaceae_Gemmiger_formicilis	0.010200984	0.000851554	0.01224088	0.024327484	0.005025041	0.037822282	0.013666934	0.00887059	0.011951616	0.012645584	0.0117727	0.003984975	0.01390965	0.009650697	0.012763718	0.004598218	0.006755885	0.010484619	0.009164562	0.014313759	0.012080362	0.021611526	0.000664773	0.026505355	0.014576155	0.018770244	0.011148673	0.005694519	0.005771696	0.000571429	0.005297933	7.09E-05	0.005094484	0	0.002400718	0.004732886	0	0.000291589	0.016918683	0.007935698	0.007284431	0.003848423	0.006769753	0.006787733	0.002000877	0.019230349	0.018402109	0.001716076
	Firmicutes_Bacilli_Bacillales_Bacillaceae_Geobacillus_lituanicus	0	0	0	0	0	0	0	0	0	0	0	0	0	0	0	0	0	0	0	0	0	0	0	0	0	0	0	0	0	0	0.000241731	0	0	0	0	0	0	0	0	0	0	0	0	0	0	0	0	0
	Firmicutes_Bacilli_Bacillales_Bacillaceae_Geobacillus_sp.	0	0	0	0	0	0	0	0	0	0	0	0	0	0	0	0	0	0	0	0	0	0	0	0	0	0	0	0	0	0	0	0	0	0	0	0	0	0	0	0	0	0	0	0	0	0	0	0
	Firmicutes_Bacilli_Bacillales_Bacillaceae_Geobacillus_stearothermophilus	0	0	0	0	0	0	0	0	0	0	0	0	0	0	0	0	0	0	0	0	0	0	0	0	0	0	0	0	0	0	0	0	0	0	0	0	0	0	0	0	0	0	0	0	0	0	0	0
	Firmicutes_Bacilli_Bacillales_Bacillaceae_Geobacillus_thermoglucosidasius	0	0	0	0	0	0	0	0	0	0	0	0	0	0	0	0	0	0	0	0	0	0	0	0	0	0	0	0	0	0	0	0	0	0	0	0	0	0	0	0	0	0	0	0	0	0	0	0
	Firmicutes_Bacilli_Bacillales_Bacillaceae_Geobacillus_thermoleovorans	0	0	0.000705847	0	0	0	0	0	0	0.00062873	0.000488222	0.000912526	0	0	0.001600947	0	0.001032149	0	0.000235551	0.000330366	0	0	0	0	0	0	0	0	0	0	0.000735264	0	0	0	0	0	0	0	0	0	0	0	0	0	0	0	0	0
	Firmicutes_Bacilli_Bacillales_Bacillaceae_Geobacillus_vulcani	0	0	0	0	0	0	0	0	0	0	0	0	0	0	0	0	0	0	0.000169816	3.81E-05	0	0	0	0	0	0	0	0	0	0	0	0	0	0	0	0	0	0	0	0	0	0	0	0	0	0	0	0
	Proteobacteria_Deltaproteobacteria_Desulfuromonadales_Geobacteraceae_Geobacter_lovleyi	0	0	0	0	0	0	0	0	0	0	3.52E-05	0	0	0	0	0	0	0	0	0	0	0	0	0	0	0	0	0	0	0	0	0	0	0	0	0	0	0	0	0	0	0	0	0	0	0	0	0
	Actinobacteria_Coriobacteriia_Eggerthellales_Eggerthellaceae_Gordonibacter_pamelaeae	0	0	0	0	0	0	0	0	0	0	0	0	0	0	0	0	0	0	0	0	0	0	0	0	0	0	0	0	0	0	0	0	0	0	0	0	0	0	0	0	0	0	0	0	0	0	0	0
	Firmicutes_Bacilli_Bacillales_Bacillaceae_Gracilibacillus_dipsosauri	0	0	0	0	0	0	0	0	0	0	0	0	0	0	0	0	0	0	0	0	0	0	0	0	0	0	0	0	0	0	0	0	0	0	0	0	0	0	0	0	0	0	0	0	0	0	0	0
	Firmicutes_Bacilli_Bacillales_Bacillaceae_Gracilibacillus_sp.	0	0	0	0	0	0	0	0	0	0	0	0	0	0	0	0	0	0	0	0	0	0	0	0	0	0	0	0	0	0	0	0	0	0	0	0	0	0	0	0	0	0	0	0	0	0	0	0
	Firmicutes_Bacilli_Lactobacillales_Carnobacteriaceae_Granulicatella_adiacens	0	0	0	0	0.000134001	0	0	0	5.98E-05	0	0	0	0	0	0	0	0	0	9.31E-05	0	0	8.89E-05	0	0	0	0	0	0	0	0	0	0	0	0	0	0	0	0	0	0.000340101	0	0	0	0	0	0.000103889	0	4.72E-05
	Firmicutes_Bacilli_Lactobacillales_Carnobacteriaceae_Granulicatella_elegans	0	0	0	0	0	0	0	0	0	0	0	0	0	0	0	0	0	0	3.29E-05	0	0	0	0	0	0	0	0	0	0	0	0	0	0	0	0	0	0	0	0	0	0	0	0	0	0	0	0	0
	Proteobacteria_Gammaproteobacteria_Pasteurellales_Pasteurellaceae_Haemophilus_aegyptius	0	0	0	0	0	0	0	0	0	0	0	0	0	0	0	0	0	0	0	0	0	0	0	0	0	0	0	0	0	0	0	0	0	0	0	0	0	0	0	0	0	0	0	7.75E-05	0	0	0	0
	Proteobacteria_Gammaproteobacteria_Pasteurellales_Pasteurellaceae_Haemophilus_haemolyticus	0	0	0	0	0	0	0	0	0	0	0	0	0	0	0	0	0	0	0	0	0	0	0	0	0	0	0	0	0	0	0	0	0	0	0	0	0	0	0	0	0	0	0	0	0	0	0	0
	Proteobacteria_Gammaproteobacteria_Pasteurellales_Pasteurellaceae_Haemophilus_influenzae	0	0	0	0	0	0	0	0	0	5.58E-05	3.52E-05	0.000136739	4.15E-05	0.000583438	0	0	0	0	0.00013147	0	0.000895227	0	0	0	0	0	0	0	0	0	0.001168365	0	0	0	0	0	0	0	0	0	0	0	0	0	0	0	0	0
Cluster4	Proteobacteria_Gammaproteobacteria_Pasteurellales_Pasteurellaceae_Haemophilus_parainfluenzae	0.004695691	0.004188723	0.074838398	0.020699852	0.000209377	0	0.002453691	0.000334739	0.000797107	0.04067984	0.202728005	0.031544931	0.103047667	0.023821037	0.011031186	0.154622742	0.087732673	0.027281922	0.008972835	0.004891964	0.081897673	0.101577984	0.002151447	0.001614796	0.001007964	0.001237399	0.086923686	0	0.002525117	0.000533333	0.051810967	0.033681107	0	0.002433925	0	0.000170136	0.005066251	0.004367878	0.000655242	0.153045608	0.006148835	0.015983785	0	0.000196151	0.000300132	0.028913871	0.004138806	0.349182109
Cluster4	Proteobacteria_Gammaproteobacteria_Pasteurellales_Pasteurellaceae_Haemophilus_pittmaniae	0	0	0.014934245	0.002974314	0	0	0	0	0	0.006165609	0.002325347	0.001266932	0.010014948	0.001322725	0.000328962	0.012190387	0.003307569	0.00214075	0.001632421	0.009320144	0.002758549	0.010443665	0	0	0	0	0.00955729	0	0	0	0.007685025	0	0	0	0	0	0	0	0	0.009296104	0	0	0	0	0	0.006113031	0	0.011430011
	Proteobacteria_Gammaproteobacteria_Pasteurellales_Pasteurellaceae_Haemophilus_sputorum	0	0	0	0	0	0	0	0	0	0	0	0.000209295	0	0	0	0	0	0	0	0	0	0	0	0	0	0	0	0	0	0	0	0	0	0	0	0	0	0	0	0	0	0	0	0	0	0	0	0
	Proteobacteria_Gammaproteobacteria_Cellvibrionales_Halieaceae_Haliea_rubra	0	0	0	0	0	0	0	0	0	0	0	0	0	0	0	0	0	0	0	0	0	0	0	0	0	0	0	0	0	0	0	0	0	0	0	0	0	0	0	0	0	0	0	0	0	0	0	0
	Proteobacteria_Gammaproteobacteria_Oceanospirillales_Halomonadaceae_Halomonas_sp.	0	0	0	0	0	0	0	0	0	0	0	0	0	0	0	0	0	0	0	0	0	0	0	0	0	0	0	0	0	0	0	0	0	0	0	0	0	0	0	0	0	0	0	0	0	0	0	0
	Proteobacteria_Gammaproteobacteria_Chromatiales_Halothiobacillaceae_Halothiobacillus_hydrothermalis	0	0	0	0	0	0	0	0	0	0	0	0	0	0	0	0	0	0	0	0	0	0	0	0	0	0	0	0	0	0	0	0	0	0	0	0	0	0	0	0	0	0	0	0	0	0	0	0
	Firmicutes_Tissierellia_Tissierellales_Peptoniphilaceae_Helcococcus_sueciensis	0	0	0	0	0	0	0	0	0	0	0	0	0	0	0	0	0	0	0	0	0	0	0	0	0	0	0	0	0	0	0	0	0	0	0	0	0	0	0	0	0	0	0	0	0	0	0	0
	Proteobacteria_Epsilonproteobacteria_Campylobacterales_Helicobacteraceae_Helicobacter_cinaedi	0	0	0	0	0	0	0.000152561	0	0	0.00013183	0	0	0	0	0	0	0	0	0	0	0	0	0.002320662	0	0	0	0	0	0	0	0	0	0	0	0	0	0	0	0	0	0	0	0	0	0	0	0	0
	Proteobacteria_Epsilonproteobacteria_Campylobacterales_Helicobacteraceae_Helicobacter_equorum	0	0	0	0	0	0	0	0	0	0	0	0	0	0	0	0	0	0	0	0	0	0	0	0	0	0	0	0	0	0	0	0	0	0	0	0	0	0	0	0	0	0	0	0	0	0	0	0
	Proteobacteria_Epsilonproteobacteria_Campylobacterales_Helicobacteraceae_Helicobacter_fennelliae	0	0	0	0	0	0	0	0	0	0	0	0	0	0	0	0	0	0	0	0	0	0	0	0	0	0	0	0	0	0	0	0	0	0	0	0	0	0	0	0	0	0	0	0	0	0	0	0
	Proteobacteria_Epsilonproteobacteria_Campylobacterales_Helicobacteraceae_Helicobacter_sp.	0	0	0	0	0	0	0	0	0	0	0	0	0	0	0	0	0	0	0	0	0	0	0	0	0	0	0	0	0	0	0	0	0	0	0	0	0	0	0	0	0	0	0	0	0	0	0	0
	Firmicutes_Erysipelotrichia_Erysipelotrichales_Erysipelotrichaceae_Holdemania_filiformis	0	0	0	0	0	0	0	0	0	0	0	0	0	0	0	0	0	0	3.29E-05	0	0	0	0	0	0	0	0	0	0	0	0.00090649	0	0	0	0	0	0	0	0	0	0	0	0	0	0	0	0	0
	Firmicutes_Erysipelotrichia_Erysipelotrichales_Erysipelotrichaceae_Holdemania_massiliensis	0	0	0	0	0.000150751	0	0	0	0	0	0	0	0	0	0	0	0	0	0	0	0	0	0	0	0	0	0	0.002609988	0	0	0	0	0	7.80E-05	0	0	0	0	0.000688844	0	0	0	0	0	0.000407871	0	0	0
Cluster1	Firmicutes_Clostridia_Clostridiales_Clostridiales_Howardella_ureilytica	8.10E-05	0	0	0	0	0	7.63E-05	0.000125527	6.48E-05	0	4.03E-05	6.14E-05	0	0	0	0	0.005254577	0	0.000202683	0	0	0	0	0	0	0	0	0	0	0.000584127	0	0	0.000306435	0	0.000382723	0	0	0.000261835	0	0	4.99E-05	0	3.47E-05	0	0	0	0	0.001306737
	Bacteroidetes_Sphingobacteriia_Sphingobacteriales_Chitinophagaceae_Hydrotalea_flava	0	0	0	0	0	0	0	0	0	0	0	0	0	0	0	0	0	0	0	0	0	0	0	0	0	0	0	0	0	0	0	0	0	0	0	0	0	0	0	0	0	0	0	0	0	0	0	0
	Proteobacteria_Alphaproteobacteria_Caulobacterales_Hyphomonadaceae_Hyphomonas_polymorpha	0	0	0	0	0	0	0	0	0	0	0	0	0	0	0	0	0	0	0	0	0	0	0	0	0	0	0	0	0	0	0	0	0	0	0	0	0	0	0	0	0	0	0	0	0	0	0	0
	Proteobacteria_Gammaproteobacteria_Alteromonadales_Idiomarinaceae_Idiomarina_donghaiensis	0	0	0	0	0	0	0	0	0	0	0	0	0	0	0	0	0	0	0	0	0	0	0	0	0	7.28E-05	0	0	0	0	0	0	0	0	0	0	0	0	0	0	0	0	0	0	0	0	0	0
	Proteobacteria_Gammaproteobacteria_Alteromonadales_Idiomarinaceae_Idiomarina_homiensis	0	0	0	0	0	0	0	0	0	0	0	0	0	0	0	0	0	0	0	0	0	0	0	0	0	0	0	0	0	0	0	0	0	0	0	0	0	0	0	0	0	0	0	0	0	0	0	0
	Proteobacteria_Gammaproteobacteria_Alteromonadales_Idiomarinaceae_Idiomarina_zobellii	0	0	0	0	0	0	0.000216128	0	0	0	0	0	0	0	0	0	0	0	0	0	0	0	0	0	0	0	0	0	0	0	0	0	0	0	0	0	0	0	0	0	0	0	0	0	0	0	0	0
	Proteobacteria_Alphaproteobacteria_Rhodospirillales_Rhodospirillaceae_Insolitispirillum_peregrinum	0	0	0	0	0	0	0	0	0	0	0	0	0	0	0	0	0	0	0	0	0	0	0	0	0	0	0	0	0	0	0	0	0	0	0	0	0	0	0	0	0	0	0	0	0	0	0	0
	Firmicutes_Clostridia_Clostridiales_Clostridiaceae_Intestinibacter_bartlettii	0	0	0	0	0	0	0	0	0	0	0	0	0	0	0	0	0	0	0	0	0	0	0	0	0	0	0	0	0	0	0	0	0	0	0	0	0	0	0	0	0	0	0	0	0	0	0	0
	Synergistetes_Synergistia_Synergistales_Synergistaceae_Jonquetella_anthropi	0	0	0	0	0	0	0	0	0	0	0	0	0	0	0	0	0	0	0	0	0	0	0	0	0	0	0	0	0	0	0	0	0	0	0	0	0	0	0	0	0	0	0	0	0	0	0	0
	Firmicutes_Erysipelotrichia_Erysipelotrichales_Erysipelotrichaceae_Kandleria_vitulina	0	0	0	0	0	0	0	0	0	0	0	0	0	0	0	0	0	0	0	0	0	0	0	0	0	0	0	0	0	0	0	0	0	0	0	0	0	0	0	0	0	0	0	0	0	0	0	0
	Proteobacteria_Alphaproteobacteria_Kiloniellales_Kiloniellaceae_Kiloniella_laminariae	0	0	0	0	0	0	0	0	0	0	0	0	0	0	0	0	0	0	0	0	0	0	0	0	0	0	0	0	0	0	0	0	0	0	0	0	0	0	0	0	0	0	0	0	0	0	0	0
	Actinobacteria_Actinobacteria_Kineosporiales_Kineosporiaceae_Kineococcus_sp.	0	0	0	0	0	0	0	0	0	0	0	0	0	0	0	0	0	0	0	0	0	0	0	0	0	0	0	0	0	0	0	0	0	0	0	0	0	0	0	0	0	0	0	0	0	0	0	0
	Actinobacteria_Actinobacteria_Kineosporiales_Kineosporiaceae_Kineosporia_sp.	0	0	0	0	0	0	0	0	0	0	0	1.67E-05	0	0	0	0	0	0	0	0	0	0	0	0	0	0	0	0	0	0	0	0	0	0	0	0	0	0	0	0	0	0	0	0	0	0	0	0
	Proteobacteria_Betaproteobacteria_Neisseriales_Neisseriaceae_Kingella_kingae	0	0	0	0	0	0	0	0	0	0	0	0	0	0	0	0	0	0	0	0	0	0	0	0	0	0	0	0	0	0	0	0	0	0	0	0	0	0	0	0	0	0	0	0	0	0	0	0
	Proteobacteria_Betaproteobacteria_Neisseriales_Neisseriaceae_Kingella_oralis	0	0	0	0	0	0	0	0	0	0	0	0	0	0	0	0	0	0	0	0	0	0	0	0	0	0	0	0	0	0	0	0	0	0	0	0	0	0	0	0	0	0	0	0	0	0	0	0
	Proteobacteria_Betaproteobacteria_Neisseriales_Neisseriaceae_Kingella_potus	0	0	0	0	0	0	0	0	0	0	0	0	0	0	0	0	0	0	0	0	0	0	0	0	0	0	0	0	0	0	0	0	0	0	0	0	0	0	0	0	0	0	0	0	0	0	0	0
	Proteobacteria_Gammaproteobacteria_Enterobacteriales_Enterobacteriaceae_Klebsiella_oxytoca	0	8.06E-05	0	0	0	0	0	0	0	0	2.52E-05	0	7.47E-05	0	0	0	0.000129019	0	0	0	4.16E-05	0	0	0	0	0	0	0	0	0	0	0	0	0	0	0	0	0	0	0.000487479	0	0	0	0	0	0	0	0
Cluster1	Proteobacteria_Gammaproteobacteria_Enterobacteriales_Enterobacteriaceae_Klebsiella_pneumoniae	0.000526241	0	0	0	0.000242877	0	0.000648385	0.000301265	0.001937965	8.62E-05	0.00042279	0.000996244	0.000249128	0.000939095	0	0	0.000821028	0.000960809	0.000361543	0.000349426	9.89E-05	0	0.001522935	0	0	0	0	0.001748317	0	0.001028571	0.000120865	0	0.000153218	0	0	0	0	0.000267785	0.001142473	0	0	0.000128281	0	0	0	0	0.000189139	0.004675914
	Proteobacteria_Gammaproteobacteria_Enterobacteriales_Enterobacteriaceae_Klebsiella_singaporensis	0	0	0	0	0	0	0	0	0	0	0	0	0	0	0	0	0	0	0	0	0	0	0	0	0	0	0	0	0	0	0	0	0	0	0	0	0	0	0	0	0	0	0	0	0	0	0	0
	Proteobacteria_Gammaproteobacteria_Enterobacteriales_Enterobacteriaceae_Klebsiella_sp.	0	0	0	0	0	0	0	0	0	3.04E-05	6.04E-05	3.07E-05	0	0	0	0	5.86E-05	0	0	0	0	8.89E-05	0	0	0	0	0.000152845	0	0	0	0	0	0	0	0	0	0	0	0	0.001836547	0	0	0	0	0	0	0	0
Cluster0	Proteobacteria_Gammaproteobacteria_Enterobacteriales_Enterobacteriaceae_Klebsiella_variicola	7.42E-05	0	0.000928747	0	0.001541013	0.002107108	0.000114421	0.001338957	3.99E-05	0.000557744	0	0.000390684	0.000390301	0.000243765	0	0	0	0	0.000328675	3.18E-05	0	0	0	0	4.29E-05	0	0	0.002684916	0.000506558	0	0	0	0	0	3.48E-05	0.000309339	0	0	0.007241263	0	0	0.001411089	0.003084512	0.002604701	0	0	0.000255894	0
	Proteobacteria_Gammaproteobacteria_Enterobacteriales_Enterobacteriaceae_Kluyvera_ascorbata	0	0	0	0	0	0	0	0	0	0	0	0	0	0	0	0	0	0	0	0	0	0	0	0	0	0	0	0	0	0	0	0	0	0	0	0	0	0	0	0	0	0	0	0	0	0	0	0
	Actinobacteria_Actinobacteria_Micrococcales_Micrococcaceae_Kocuria_kristinae	0	0	0	0	0	0	0	0	0	0	0	0	0	0	0	0	0	0	0	0	0	0	0	0	0	0	0	0	0	0	0	0	0	0	0	0	0	0	0	0	0	0	0	0	0	0	0	0
	Actinobacteria_Actinobacteria_Micrococcales_Micrococcaceae_Kocuria_palustris	0	0	0	0	0	0	0	0	0	0	0	0	0	0	0	0	0	0	0	0	0	0	0	0	0	0	0	0	0	0	0	0	0	0	0	0	0	0	0	0	0	0	0	0	0	0	0	0
	Actinobacteria_Actinobacteria_Micrococcales_Dermacoccaceae_Kytococcus_schroeteri	0	0	0	0	0	0	0	0	0	0	0	0	0	0	0	0	0	0	0	0	0	0	0	0	0	0	0	0	0	0	0	0	0	0	0	0	0	0	0	0	8.31E-05	0	0	0	0	0	0	0
	Firmicutes_Clostridia_Clostridiales_Lachnospiraceae_Lachnoanaerobaculum_orale	0	0	0	0	0	0	0	0	0	0	0	0	0	0	0	0	0	0	0	0	0	0	0	0	0	0	0	0	0	0	0	0	0	0	0	0	0	0	0	0	0	0	0	0	0	0	0	0
	Firmicutes_Clostridia_Clostridiales_Lachnospiraceae_Lachnoanaerobaculum_umeaense	0	0	0	0	0	0	0	0	0	0	0	2.51E-05	0	0	0	0	0	0	0	0	0	0	0	0	0	0	0	0	0	0	0	0	0	0	0	0	0	0	0	0	0	0	0	0	0	0	0	0
	Firmicutes_Clostridia_Clostridiales_Lachnospiraceae_Lachnobacterium_bovis	0	0	0	0	0	0	0	0	0	0	0	0	0	0	0	0	0	0	0	0	0	0	0	0	0	0	0	0	0	0	0	0	0	0	0	0	0	0	0	0	0	0	0	0	0	0	0	0
	Firmicutes_Clostridia_Clostridiales_Lachnospiraceae_Lachnobacterium_sp.	0	0	0	0	0	0	0	0	0	0	0	0	0	0	0	0	0	0	0.000493013	0	0.000145735	0	0	0	0	0	0	0	0	0	0	0	0	0	0	0	0	0	0	0.004001859	0	0	0	0	0	0	0	0
	Firmicutes_Clostridia_Clostridiales_Lachnospiraceae_Lachnoclostridium_aminovalericum	0	0	0	0	0	0	0	0	0	0	0	0	0	0	0	0	0	0	0	0	0	0	0	0	0	0	0	0	0	0	0	0	0	0	0	0	0	0	0	0	0	0	0	0	0	0	0	0
Cluster3	Firmicutes_Clostridia_Clostridiales_Lachnospiraceae_Lachnoclostridium_clostridioforme	0.000114694	0.000736479	0.000204324	0.000171926	0.003927907	0.004518784	0	0	2.49E-05	0.000207887	0.000176163	0.000128368	0.000190998	0.000111892	0	0.002810022	0.00034014	0.001205225	0.000104081	9.53E-05	0.001530214	0	0	0	0.000278798	0.000391236	0.001087895	0	0.002317888	0	0.000221587	9.92E-05	0.000191522	9.36E-05	5.57E-05	0.000340273	0	0.000368949	0	0.000351438	5.54E-05	0	0.000179063	3.19E-05	0.000138522	0.000180438	0.000244768	0
	Firmicutes_Clostridia_Clostridiales_Lachnospiraceae_Lachnoclostridium_oroticum	0	0	0	0	0	0	0	0	0	0	0	0	0	0	0	0	0	0	0	0	0	0	0	0	0	0	0	0	0	0	0	0	0	0	0	0	0	0	0	0	0	0	0	0	0	0	0	0
	Firmicutes_Bacilli_Lactobacillales_Lactobacillaceae_Lactobacillus_acidipiscis	0	0	0	0	0	0	0	0	0	0	0	0	0	0	0	0	0	0	0	0	0	0	0	0	0	0	0	0	0	0	0	0	0	0	0	0	0	0	0	0	0	0	0	0	0	0	0	0
	Firmicutes_Bacilli_Lactobacillales_Lactobacillaceae_Lactobacillus_agilis	0	0	0	0	0	0	0	0	0	0	0	0	0	0	0	0	0	0	0	0	0	0	0	0	0	0	0	0	0	0	0	0	0	0	0	0	0	0	0	0	0	0	0	0	0	0	0	0
	Firmicutes_Bacilli_Lactobacillales_Lactobacillaceae_Lactobacillus_alvi	0	0	0	0	0	0	0	0	0	0	0	0	0	0	0	0	0	0	0	0	0	0	0	0	0	0	0	0	0	0	0	0	0	0	0	0	0	0	0	0	0	0	0	0	0	0	0	0
	Firmicutes_Bacilli_Lactobacillales_Lactobacillaceae_Lactobacillus_ceti	0	0	0	0	0	0	0	0	0	0	0	0	0	0	0	0	0	0	0	0	0	0	0	0	0	0	0	0	0	0	0	0	0	0	0	0	0	0	0	0	0	0	0	0	0	0	0	0
	Firmicutes_Bacilli_Lactobacillales_Lactobacillaceae_Lactobacillus_delbrueckii	0	0.000241657	0	0	0.000117251	0	8.90E-05	0	0	0	0	0	0	0	0	0	0	0	0	0.000273188	0	0	0	0.000100925	0.000264501	0	0.000215781	0	0	0.000177778	0	0	0	0	0	0	0	0	0.005678763	0	0	0	0	0	0	0	0	0
	Firmicutes_Bacilli_Lactobacillales_Lactobacillaceae_Lactobacillus_fermentum	0	0	0	0	0	0	0	0	0	0	0	0	0	0	0	0	0	0	0	0	0	0	0	0	0	0	0	0	0	0	0	0	0	0	0	0	0	0	0	0.000204061	0	0	0	0	0	0	0	0
	Firmicutes_Bacilli_Lactobacillales_Lactobacillaceae_Lactobacillus_floricola	0	0	0	0	0	0	0	0	0	0	0	0	0	0	0	0	0	0	0	0	0	0	0	0	0	0	0	0	0	0	0	0	0	0	0	0	0	0	0	0	0	0	0	0	0	0	0	0
	Firmicutes_Bacilli_Lactobacillales_Lactobacillaceae_Lactobacillus_gasseri	0	0	0	0	0	0	0	0	0	0	0	0	0	0	0	0	0	0	0	0	0	0	0	0	0	0	0	0	0	0	0	0	0	0	0	0	0	0	0	0	0	0	0	0	0	0	0	0
	Firmicutes_Bacilli_Lactobacillales_Lactobacillaceae_Lactobacillus_helveticus	0	0	0	0	0	0	0	0	0	0	0	0	0	0	0	0	0	0	0	0	0	0	0	0	0	0	0	0	0	0	0	0	0	0	0	0	0	0	0	0	0	0	0	0	0	0	0	0
	Firmicutes_Bacilli_Lactobacillales_Lactobacillaceae_Lactobacillus_iners	0	0	0	0	0	0	0	0	0	0	0	0	0	0	0	0	0	0	0	0	0	0	0	0	0	0	0	0	0	0	0	0	0	0	0	0	0	0	0	0	0	0	0	0	0	0	0	0
	Firmicutes_Bacilli_Lactobacillales_Lactobacillaceae_Lactobacillus_mucosae	0.000134934	3.84E-05	0.000139312	0	0.007110434	0	0.000152561	0	0	0	0	0	0	0.000231777	0	5.11E-05	0	0	0	0	0	7.62E-05	0	0	0	0	0.000962023	0	0	0	7.05E-05	0.001715242	0	0	0	9.28E-05	0	0	0	0	0	0	0	0	0	0	0	0
	Firmicutes_Bacilli_Lactobacillales_Lactobacillaceae_Lactobacillus_pontis	0	0	0	0	0	0	0	0	0	0	0	0	0	0	0	0	0	0	0	0	0	0	0	0	0	0	0	0	0	0	0	0	0	0	0	0	0	0	0	0	0	0	0	0	0	0	0	0
	Firmicutes_Bacilli_Lactobacillales_Lactobacillaceae_Lactobacillus_reuteri	0	0	0	0	0	0	0	0	0	0	0	0	0	0	0	0	0	0	0	0	0	0	0	0	0	0	0	0	0	0	0	0	0	0	0	0	0	0	0	0	0	0	0	0	0	0	0	0
Cluster0	Firmicutes_Bacilli_Lactobacillales_Lactobacillaceae_Lactobacillus_rogosae	0.036121737	0.047752206	0.012352329	0.01794331	0.019195658	0.103621243	0.028312801	0.012226351	0.029652362	0.010799957	0.01411818	0.004171946	0.024547417	0.007356908	0.017763937	0.020927001	0.018414478	0.019351032	0.016565234	0.017719074	0.00846302	0.001537328	0.016051248	0.043700405	0.020102083	0.002957019	0.309609437	0.011451478	0.044224083	0.00487619	0.020819065	0.012587888	0.019777835	0.001591413	0.001412596	0.003356328	0.025136399	0.017673837	0.042321909	0.096951558	0.011693866	0.038355954	0.00342531	0.019250156	0.008503729	0.009645247	0.030551507	0.050710833
Cluster4	Firmicutes_Bacilli_Lactobacillales_Lactobacillaceae_Lactobacillus_ruminis	0.000532988	0.003344841	0.001950368	0.002154802	0.132342842	0.003213495	0.000139848	0.001497958	4.48E-05	0.004827023	0.005702637	0.004420309	0.005771467	0.001398652	0.000197377	0.007122129	0	0.001533923	0.001506428	0.004752193	0.001108624	0.001245109	9.67E-05	0	0	0	0.017397324	0	0.00121267	0	0.00152089	0.000240984	0.000715015	0	0.001029873	0	0	0.000267785	0	0.005668356	0.000254817	0.004925982	0	0	0	0.00145991	0	0.000653368
	Firmicutes_Bacilli_Lactobacillales_Lactobacillaceae_Lactobacillus_sakei	0	0	0	0	0	0	0	0	0	0	0	0	0	0	0	0	0	0	0	0	0	0	0	0	0	0	0	0	0	0	0	0	0	0	0	0	0	0	0	0	0	0	0	0	0	0	0	0
	Firmicutes_Bacilli_Lactobacillales_Lactobacillaceae_Lactobacillus_salivarius	0	0	0.001365257	0	4.19E-05	0	0	0	0	0.000491829	0.00029696	0.000147902	0.000224215	0.000139865	0	0	0	0	7.12E-05	0	0	0	0	0	0	0	0.000368625	0	0	0	0	0	0	0	0	0	0	0	8.40E-05	0	0	0	0	0	0	2.73E-05	0	0
	Firmicutes_Bacilli_Lactobacillales_Lactobacillaceae_Lactobacillus_secaliphilus	0	0	0	0	0	0	0	0	0	0	0	0	0	0	0	0	0	0	0	0	0	0	0	0	0	0	0	0	0	0	0	0.000141756	0	0	0	0	0	0	0	0	0	0	0	0	0	0	0	0
	Firmicutes_Bacilli_Lactobacillales_Lactobacillaceae_Lactobacillus_sp.	0	8.82E-05	0	0	0	0	0	0	0	0	0	0	0	0	0	0	0	0	0	0	0	0	0	0	0	0	0	0	0	0	0	0.000297687	0	0	0	0	0	0	0	0	0	0	0	0	0	0	0	0
	Firmicutes_Bacilli_Lactobacillales_Lactobacillaceae_Lactobacillus_suntoryeus	0	0	0	0	0	0	0	0	0	0	0	3.35E-05	0	0	0	0	0	0	0	0	0	0	0	0	0	0	0	0	0	0	0	0	0	0	0	0	0	0	0	0	0	0	0	0	0	0	0	0
	Firmicutes_Bacilli_Lactobacillales_Lactobacillaceae_Lactobacillus_vaginalis	0	0	0	0	0	0	0	0	0	0	0	0	0	0	0	0	0	0	0	0	0	0	0	0	0	0	0	0	0	0	0	0	0	0	0	0	0	0	0	0	0	0	0	0	0	0	0	0
	Firmicutes_Bacilli_Lactobacillales_Lactobacillaceae_Lactobacillus_zeae	0	0	0	0	0	0	0	0	0	0	0	0	0	0	0	0	0	0	0	0	0	0	0	0	0	0	0	0	0	0	0	0	0	0	0	0	0	0	0	0	0	0	0	0	0	0	0	0
	Firmicutes_Bacilli_Lactobacillales_Streptococcaceae_Lactococcus_chungangensis	0	0	0	0	0	0	0	0	0	0	0	0	0	0	0	0	0	0	0	0	0	0	0	0	0	0	0	0	0	0	0	0	0	0	0	0	0	0	0	0	0	0	0	0	0	0	0	0
	Firmicutes_Bacilli_Lactobacillales_Streptococcaceae_Lactococcus_garvieae	0	0	0	0	0	0	0	0	0	0	0	0	0	0	0	0	0	0	0	0	0	0	0	0	0	0	0	0	0	0	0	0	0	0	0	0	0	0	0	0	0	0	0	0	0	0	0	0
	Firmicutes_Bacilli_Lactobacillales_Streptococcaceae_Lactococcus_lactis	0	0	0	0	0	0	0	0	0	0	0	0	0	0	0	0	0	0	0	0	0	0	0	0	0	0	0	0	0	0	0	0	0	0	0	0	0	0	0	0	0	0	0	0	0	0	0	0
	Firmicutes_Bacilli_Lactobacillales_Streptococcaceae_Lactococcus_taiwanensis	0	0	0	0	0	0	0	0	0	0	0	0	0	0	0	0	0	0	0	0	0	0	0	0	0	0	0	0	0	0	0	0	0	0	0	0	0	0	0	0	0	0	0	0	0	0	0	0
	Firmicutes_Clostridia_Clostridiales_Clostridiaceae_Lactonifactor_longoviformis	0	0	0	0	0	0	0	0	0	0	0	0	0	0	0	0	0	0	0	0	0	0	0	0	0	0	0	0	0	0	0	0	0	0	0	0	0	0	0	0	0	0	0	0	0	0	0	0
	Proteobacteria_Betaproteobacteria_Neisseriales_Chromobacteriaceae_Laribacter_hongkongensis	0	0	0	0	0	0	0	0	0	0	0	0	0	0	0	0	0	0	0	0	0	0	0	0	0	0	0	0	0	0	0	0	0	0	0	0	0	0	0	0	0	0	0	0	0	0	0	0
	Proteobacteria_Gammaproteobacteria_Enterobacterales_Enterobacteriaceae_Leclercia_adecarboxylata	0	0	0	0	0	0	0	0	0	0	0	0	0	0	0	0	0	0	0	0	0	0	0	0	0	0	0	0	0	0	0	0	0	0	0	0	0	0	0	0	0	0	0	0	0	0	0	0
	Proteobacteria_Gammaproteobacteria_Enterobacterales_Enterobacteriaceae_Leclercia_sp.	0	0	0	0	0	0	0	0	0	0	0	0	0	0	0	0	0	0	0	0	0	0	0	0	0	0	0	0	0	0	0	0	0	0	0	0	0	0	0	0	0	0	0	0	0	0	0	0
	Proteobacteria_Gammaproteobacteria_Enterobacteriales_Enterobacteriaceae_Lelliottia_amnigena	0	0	0	0	0	0	0	0	0	0	0	0	0	0	0	0	0	0	0	0	0	0	0	0	0	0	0	0	0	0	0	0	0	0	0	0	0	0	0	0	0	0	0	0	0	0	0	0
	Firmicutes_Bacilli_Bacillales_Bacillaceae_Lentibacillus_salinarum	0	0	0	0	0	0	0	0	0	0	0	0	0	0	0	0	0	0	0	0	0	0	0	0	0	0	0	0	0	0	0	0	0	0	0	0	0	0	0	0	0	0	0	0	0	0	0	0
	Nitrospira_Nitrospira_Nitrospirales_Nitrospiraceae_Leptospirillum_ferrodiazotrophum	0	0	0	0	0	0	0.000190701	0	0	0	0	0	0	0	0	0	0	0	0	0	0	0	0	0	0	0	0	0	0	0	0	0	0	0	0	0	0	0	0	0	0	0	0	0	0	0	0	0
	Nitrospira_Nitrospira_Nitrospirales_Nitrospiraceae_Leptospirillum_ferrooxidans	0	0	0	0	0	0	0	0	0	0	0	0	0	0	0	0	0	0	0	0	0	0	0	0	0	0	0	0	0	0	0	0	0	0	0	0	0	0	0	0	0	0	0	0	0	0	0	0
	Fusobacteria_Fusobacteriia_Fusobacteriales_Leptotrichiaceae_Leptotrichia_buccalis	0	0	0	0	0	0	0	0	0	0	0	0	0	0	0	0	0	0	0	0	0	0	0	0	0	0	0	0	0	0	0	0	0	0	0	0	0	0	0	0	0	0	0	0	0	0	0	0
	Fusobacteria_Fusobacteriia_Fusobacteriales_Leptotrichiaceae_Leptotrichia_genomosp.	0	0	0	0	0	0	0	0	0	0	0	0	0	0	0	0	0	0	0	0	0	0	0	0	0	0	0	0	0	0	0	0	0	0	0	0	0	0	0	0	0	0	0	0	0	0	0	0
	Fusobacteria_Fusobacteriia_Fusobacteriales_Leptotrichiaceae_Leptotrichia_hofstadii	0	0	0	0	0	0	0	0	0	0	0	0	0	0	0	0	0	0	0	0	0	0	0	0	0	0	0	0	0	0	0	0	0	0	0	0	0	0	0	0	0	0	0	0	0	0	0	0
	Fusobacteria_Fusobacteriia_Fusobacteriales_Leptotrichiaceae_Leptotrichia_hongkongensis	0	0	0	0	0	0	0	0	0	0	0	0	0	0	0	0	0	0	0	0	0	0	0	0	0	0	0	0	0	0	0	0	0	0	0	0	0	0	0	0	0	0	0	0	0	0	0	0
	Fusobacteria_Fusobacteriia_Fusobacteriales_Leptotrichiaceae_Leptotrichia_sp.	0	0	0	0	0	0	0	0	0	0	0	0	0	0	0	0	0	0	0	0	0	0	0	0	0	0	0	0	0	0	0	0	0	0	0	0	0	0	0	0	0	0	0	0	0	0	0	0
	Fusobacteria_Fusobacteriia_Fusobacteriales_Leptotrichiaceae_Leptotrichia_trevisanii	0	0	0	0	0	0	0	0	0	0	0	0	0	0	0	0	0	0	0	0	0	0	0	0	0	0	0	0	0	0	0	0	0	0	0	0	0	0	0	0	0	0	0	0	0	0	0	0
	Actinobacteria_Actinobacteria_Micrococcales_Microbacteriaceae_Leucobacter_komagatae	0	0	0	0	0	0	0	0	0	0	0	0	0	0	0	0	0	0	0	0	0	0	0	0	0	0	0	0	0	0	0	0	0	0	0	0	0	0	0	0	0	0	0	0	0	0	0	0
	Proteobacteria_Betaproteobacteria_Burkholderiales_Burkholderiaceae_Limnobacter_thiooxidans	0	0	0	0	0	0	0	0	0	0	0	0	0	0	0	0	0	0	0	0	0	0	0	0	0	0	0	0	0	0	0	0	0	0	0	0	0	0	0	0	0	0	0	0	0	0	0	0
	Proteobacteria_Betaproteobacteria_Burkholderiales_Comamonadaceae_Limnohabitans_australis	0	0	0	0	0	0	0	0	0	0	0	0	0	0	0	0	0	0	0	0	0	0	0	0	0	0	0	0	0	0	0	0	0	0	0	0	0	0	0	0	0	0	0	0	0	0	0	0
	Proteobacteria_Gammaproteobacteria_Lysobacteriales_Rhodanobacteraceae_Luteibacter_rhizovicinus	0	0	0	0	0	0	0	0	0	0	0	0	0	0	0	0	0	0	0	0	0	0	0	0	0	0	0	0	0	0	0	0	0	0	0	0	0	0	0	0	0	0	0	0	0	0	0	0
	Proteobacteria_Gammaproteobacteria_Lysobacteriales_Lysobacteraceae_Luteimonas_composti	0	0	0	0	0	0	0	0	0	0	0	0	0	0	0	0	0	0	0	0	0	0	0	0	0	0	0	0	0	0	0	0	0	0	0	0	0	0	0	0	0	0	0	0	0	3.83E-05	0	0
	Proteobacteria_Gammaproteobacteria_Lysobacteriales_Lysobacteraceae_Luteimonas_lutimaris	0	0	0	0	0	0	0	0	0	0	0	0	0	0	0	0	0	0	0	0	0	0	0	0	0	0	0	0	0	0	0	0	0	0	0	0	0	0	0	0	0	0	0	0	0	0	0	0
	Proteobacteria_Gammaproteobacteria_Lysobacteriales_Lysobacteraceae_Luteimonas_marina	0	0	0	0	0	0	0	0	0	0	0	0	0	0	0	0	0	0	0	0	0	0	0	0	0	0	0	0	0	0	0	0	0	0	0	0	0	0	0	0	0	0	0	0	0	0	0	0
	Proteobacteria_Gammaproteobacteria_Lysobacteriales_Lysobacteraceae_Luteimonas_sp.	0	0	0	0	0	0	0	0	0	0	0	0	0	0	0	0	0	0	0	0	0	0	0	0	0	0	0	0	0	0	0	0	0	0	0	0	0	0	0	0	0	0	0	0	0	0	0	0
	Proteobacteria_Gammaproteobacteria_Lysobacteriales_Lysobacteraceae_Lysobacter_taiwanensis	0	0	0	0	0	0	0	0	0	0	0	0	0	0	0	0	0	0	0	0	0	0	0	0	0	0	0	0	0	0	0	0	0	0	0	0	0	0	0	0	0	0	0	0	0	0	0	0
	Proteobacteria_Gammaproteobacteria_Lysobacteriales_Lysobacteraceae_Lysobacter_xinjiangensis	0	0	0	0	0	0	0	0	0	0	0	0	0	0	0	0	0	0	0	0	0	0	0	0	0	0	0	0	0	0	0	0	0	0	0	0	0	0	0	0	0	0	0	0	0	0	0	0
	Proteobacteria_Alphaproteobacteria_Rhodospirillales_Rhodospirillaceae_Magnetospirillum_gryphiswaldense	0	0	0	0	0	0	0	0	0	0	0	0	0	0	0	0	0	0	0	0	0	0	0	0	0	0	0	0	0	0	0	0	0	0	0	0	0	0	0	0	0	0	0	0	0	0	0	0
	Proteobacteria_Alphaproteobacteria_Rhodospirillales_Rhodospirillaceae_Magnetovibrio_blakemorei	0	0	0	0	0	0	0	0	0	0	0	0	0	0	0	0	0	0	0	0	0	0	0	0	0	0	0	0	0	0	0	0	0	0	0	0	0	0	0	0	0	0	0	0	0	0	0	0
	Proteobacteria_Gammaproteobacteria_Enterobacteriales_Enterobacteriaceae_Mangrovibacter_plantisponsor	0	0	0	0	0	0	0	0	0	0	0	0	0	0	0	0	0	0	0	0	0	0	0	0	0	0	0	0	0	0	0	0	0	0	0	0	0	0	0	0	0	0	0	0	0	0	0	0
	Proteobacteria_Gammaproteobacteria_Pasteurellales_Pasteurellaceae_Mannheimia_granulomatis	0	0	0	0	0	0	0	0	0	3.04E-05	0	0	0	0	0	0	0	0	4.93E-05	0	0	0	0	0	0	0	8.09E-05	0	0	0	0	0	0	0	0	0	0	0	0	0	0	0	0	0	0	0	0	0
	Proteobacteria_Gammaproteobacteria_Pasteurellales_Pasteurellaceae_Mannheimia_varigena	0	0	0	0	0	0	0	0	0	0	0	0	0	0	0	0	0	0	0	0	0	0	0	0	0	0	0	0	0	0	0	0	0	0	0	0	0	0	0	0	0	0	0	0	0	0	0	0.000149566
	Bacteroidetes_Flavobacteriia_Flavobacteriales_Flavobacteriaceae_Maribacter_polysiphoniae	0	0	0	0	0	0	0	0	0	0	0	0	0	0	0	0	0	0	0	0	0	0	0	0	0	0	0	0	0	0	0	0	0	0	0	0	0	0	0	0	0	0	0	0	0	0	0	0
	Proteobacteria_Gammaproteobacteria_Alteromonadales_Alteromonadaceae_Marinobacter_excellens	0	0	0	0	0	0	7.63E-05	0	0	0	0	0	0	0	0	0	0	0	0	0	0	0	0	0	0	0	0	0	0	0	0	0	0	0	0	0	0	0	0	0	0	0	0	0	0	0	0	0
	Proteobacteria_Gammaproteobacteria_Alteromonadales_Alteromonadaceae_Marinobacter_hydrocarbonoclasticus	0	0	0	0	0	0	0	0	0	0	0	0	0	0	0	0	0	0	0	0	0	0	0	0	0	0	0	0	0	0	0	0	0	0	0	0	0	0	0	0	0	0	0	0	0	0	0	0
	Proteobacteria_Gammaproteobacteria_Alteromonadales_Alteromonadaceae_Marinobacter_sp.	0	0	0	0	0	0	0	0	0	0	0	0	0	0	0	0	0	0	0	0	0	0	0	0	0	0	0	0	0	0	0	0	0	0	0	0	0	0	0	0	0	0	0	0	0	0	0	0
	Proteobacteria_Gammaproteobacteria_Alteromonadales_Alteromonadaceae_Marinobacterium_sp.	0	0	0	0	0	0	0	0	0	0	0	0	0	0	0	0	0	0	0	0	0	0	0	0	0	0	0	0	0	0	0	0	0	0	0	0	0	0	0	0	0	0	0	0	0	0	0	0
	Actinobacteria_Actinomycetales_Propionibacterineae_Nocardioidaceae_Marmoricola_korecus	0	0	0	0	0	0	0	0	0	0	0	0	0	0	0	0	0	0	0	0	0	0	0	0	0.000586192	0	0	0	0	0	0	0	0	0	0	0	0	0	0	0	0	0	0	0	0	0	0	0
	Actinobacteria_Actinomycetales_Propionibacterineae_Nocardioidaceae_Marmoricola_scoriae	0	0	0	0	0	0	0	0	0	0	0	3.07E-05	0	0	0	0	0	0	0	0	0	0	0	0	0	0	0	0	0	0	0	0	0	0	0	0	0	0	0	0	0	0	0	0	0	0	0	0
	Firmicutes_Clostridia_Clostridiales_Lachnospiraceae_Marvinbryantia_formatexigens	0	0	0	0	0	0	0	0	0	0	0	0	0	0	0	0	0	0	0	0	0	0	0	0	0	0	0	0	0	0	0	0	0	0	0	0	0	0	0	0	0	0	0	0	0	0	0	0
	Firmicutes_Negativicutes_Selenomonadales_Selenomonadaceae_Megamonas_funiformis	6.07E-05	0	0	0	4.19E-05	0	0	6.69E-05	0	0	0	0.000340453	0	0	0	0	0	0	0.000175293	0.000133417	0	0	0	0	0.000371731	0	0	0	0	0	0	0	0	0	0	0.001098153	0	0	0	0	0	0	0	0	0	0	0	0
	Firmicutes_Negativicutes_Veillonellales_Veillonellaceae_Megasphaera_cerevisiae	0	0	0	0	0	0	0	0	0	0	0	0	0	0	0	0	0	0	0	0	0	0	0	0	0	0	0	0	0	0	0	0	0	0	0	0	0	0	0	0	0	0	0	0	0	0	0	0
Cluster2	Firmicutes_Negativicutes_Veillonellales_Veillonellaceae_Megasphaera_elsdenii	0.00876394	0.038611431	0.017144662	0.005879858	0	0.004692822	0.019985507	0.003288813	0.002590596	0.022324982	0.034391987	0.014912961	0.05533134	0.006074145	0.001535155	0.067685768	0.001466121	0.032128108	0.004771269	0.000883095	0.00682871	0.019286477	0.043270684	0.051976232	0.012388659	4.55E-05	0.005061857	0.003471659	0.015242803	0.000977778	0.007886467	0.005556816	0.016853933	0.003931725	0.00717432	0.022133201	0.01039231	0.0253325	0.030964382	0.023603034	0.03559123	0.049901224	0.020759807	0.004798854	0.012228439	0.003072919	0	0.001220146
	Firmicutes_Negativicutes_Veillonellales_Veillonellaceae_Megasphaera_genomosp.	0	0	0	0	0	0	0	0	0	0	0	0	0	0	0	0	0	0	0	0	0	0	0	0	0	0	0	0	0	0	0	0	0	0	0	0	0	0	0	0	0	0	0	0	0	0	0	0
	Firmicutes_Negativicutes_Veillonellales_Veillonellaceae_Megasphaera_hominis	0	0	0	0.00113471	0	0	0	0	0	0	0	0	0	0	0	0	0	5.06E-05	0.000920291	0	0	0	0	0	0	0	0.000764224	0	0	0	0.000362596	0	0	0	0	0	0	0	0	0	0	0	0	0	0	0	0	0
Cluster1	Firmicutes_Negativicutes_Veillonellales_Veillonellaceae_Megasphaera_micronuciformis	0.002388326	0.000598389	0	0	0	6.22E-05	0.000139848	0	0	2.54E-05	0.001449567	0.00018697	0	0	0	0.000623314	0	0	0	0	0	0	0	0	0.000421772	0.001483059	0.000710278	0	0.000652386	0	0	0	0.000165986	0	4.18E-05	0	0	0	0	0.000136041	0	0.000179593	0	0	0	0	0	0
Cluster0	Firmicutes_Negativicutes_Veillonellales_Veillonellaceae_Megasphaera_sp.	0.004155956	0.006309935	0.009268891	0.000767935	0	0	0.033728721	0.231003548	0.00020924	0.003163931	0.001293537	0.002698509	0.018850689	0.003508618	0.000350893	0.006733835	0.001008691	0.004037084	0.00081621	0.000279541	0.001358455	0.004688215	0.000604339	0	0.001229573	0	0	0	0.004727878	0.000393651	0.00071512	0.000425267	0.000306435	0.001934658	0.000327054	0.003248059	0.001493895	0.004480943	0.000655242	0.008842635	0	0.001411089	0	0.00083022	0.003201404	0.000727221	0	0.002117543
	Firmicutes_Negativicutes_Veillonellales_Veillonellaceae_Megasphaera_sueciensis	0	0	0	0	0	0	0	0	0	0	0	0	0	0	0	0	0	0	0	0	0	0	0	0	0	0	0	0	0	0	0	0	0	0	0	0	0	0	0	0	0	0	0	0	0	0	0	0
	Deinococcus-Thermus_Deinococci_Thermales_Thermaceae_Meiothermus_silvanus	0	0	0	0	0	0	0	0	0	0	0	0	0	0	0	0	0	0	0	0	0	0	0	0	0	0	0	0	0	0	0	0	0	0	0	0	0	0	0	0	0	0	0	0	0	0	0	0
	Proteobacteria_Alphaproteobacteria_Rhizobiales_Phyllobacteriaceae_Mesorhizobium_sp.	0	0	0	0	0	0	0	0	0	0	0	0	0	0	0	0	0	0	0	0	0	0	0	0	0	0	0	0	0	0	0	0	0	0	0	0	0	0	0	0	0	0	0	0	0	0	0	0
	Euryarchaeota_Methanobacteria_Methanobacteriales_Methanobacteriaceae_Methanobacterium_beijingense	0	0	0	0	0	0	0	0	0	0	0	0	0	0	0	0	0	0	0	0	0	0	0	0	0	0	0	0	0	0	0	0	0	0	0	0	0	0	0	0	0	0	0	0	0	0	0	0
	Euryarchaeota_Methanobacteria_Methanobacteriales_Methanobacteriaceae_Methanobrevibacter_smithii	0	0	0	0	0	0	0	0	0	0	0	0	0	0	0	0	0	0	0	0	0	0	0	0	0	0	0	0	0	0	0	0	0	0	0	0	0	0	0	0	0	0	0	0	0	0	0	0
	Unclassified Burkholderiales_____petroleiphilum	0	0	0	0	0	0	0	0	0	0	0	0	0	0	0	0	0	0	0	0	0	0	0	0	0	0	0	0	0	0	0	0	0	0	0	0	0	0	0	0	0	0	0	0	0	0.000235117	0	0
	Proteobacteria_Betaproteobacteria_Methylophilales_Methylophilaceae_Methylobacillus_flagellatus	0	0	0	0	0	0	0	0	0	0	0	0	0	0	0	0	0	0	0	0	0	0	0	0	0	0	0	0	0	0	0	0	0	0	0	0	0	0	0	0	0	0	0	0	0	0	0	0
	Proteobacteria_Alphaproteobacteria_Rhizobiales_Methylobacteriaceae_Methylobacterium_aerolatum	0	0	0	0	0	0	0.000114421	0	0	0	0	1.67E-05	0	0	0	0	0	0	0	0	0	0	0	0	0	0	0	0	0	0	0	0	0	0	0	0	0	0	0	0	0	0	0	0	0	0	0	0
	Proteobacteria_Alphaproteobacteria_Rhizobiales_Methylobacteriaceae_Methylobacterium_goesingense	0	0	0	0	0	0	0	0	0	0	0	0	0	0	0	0	0	0	0	0	0	0	0	0	0	0	0	0	0	0	0	0	0	0	0	0	0	0	0	0	0	0	0	0	0	0	0	0
	Proteobacteria_Alphaproteobacteria_Rhizobiales_Methylobacteriaceae_Methylobacterium_hispanicum	0	0	0	0	0	0	0	0	0	0	0	0	0	0	0	0	0	0	0	0	0	0	0	0	0	0	0	0	0	0	0	0	0	0	0	0	0	0	0	0	0	0	0	0	0	0	0	0
	Proteobacteria_Alphaproteobacteria_Rhizobiales_Methylobacteriaceae_Methylobacterium_jeotgali	0	0	0	0	0	0	0.000216128	0	0	0	0	0	0	0	0	0	0	0	0	0	0	0	0	0	0	0	0	0	0	0	0	0	0	0	0	0	0	0	0	0	0	0	0	0	0	0	0	0
	Proteobacteria_Alphaproteobacteria_Rhizobiales_Methylobacteriaceae_Methylobacterium_komagatae	0	0	0	0	0	0	0	0	0	0	0	0	0	0	0	0	0	0	0	0	0	0	0	0	0	0	0	0	0	0	0	0	0	0	0	0	0	0	0	0	0	0	0	0	0	0	0	0
	Proteobacteria_Alphaproteobacteria_Rhizobiales_Methylobacteriaceae_Methylobacterium_mesophilicum	0	0	0	0	0	0	0	0	0	0	0	0	0	0	0	0	0	0	0	0	0	0	0	0	0	0	0	0	0	0	0	0	0	0	0	0	0	0	0	0	0	0	0	0	0	0	0	0
	Proteobacteria_Alphaproteobacteria_Rhizobiales_Methylobacteriaceae_Methylobacterium_persicinum	0	0	0	0	0	0	0	0	0	0	0	0	0	0	0	0	0	0	0	0	0	0	0	0	0	0	0	0	0	0	0	0	0	0	0	0	0	0	0	0	0	0	0	0	0	0	0	0
	Proteobacteria_Alphaproteobacteria_Rhizobiales_Methylobacteriaceae_Methylobacterium_sp.	0	0	0	0	0	0	6.36E-05	0	0	0	0	0	0	0	0	0	0	0	0	0	0	0	0	0	0	0	0	0	0	0	0	0	0	0	0	0	0	0	0	0	0	0	0	0	0	0	0	0
	Proteobacteria_Gammaproteobacteria_Thiotrichales_Piscirickettsiaceae_Methylophaga_alcalica	0	0	0	0	0	0	0	0	0	0	0	0	0	0	0	0	0	0	0	0	0	0	0	0	0	0	0	0	0	0	0	0	0	0	0	0	0	0	0	0	0	0	0	0	0	0	0	0
	Proteobacteria_Gammaproteobacteria_Thiotrichales_Piscirickettsiaceae_Methylophaga_thiooxydans	0	0	0	0	0	0	0.000139848	0	0	0	0	0	0	0	0	0	0	0	0	0	0	0	0	0	0	0	0	0	0	0	0	0	0	0	0	0	0	0	0	0	0	0	0	0	0	0	0	0
	Proteobacteria_Betaproteobacteria_Methylophilales_Methylophilaceae_Methylophilus_methylotrophus	0	0	0	0	0	0	0	0	0	0	0	0	0	0	0	0	0	0	0	0	0	0	0	0	0	0	0	0	0	0	0	0	0	0	0	0	0	0	0	0	0	0	0	0	0	0	0	0
	Proteobacteria_Betaproteobacteria_Methylophilales_Methylophilaceae_Methylotenera_mobilis	0	0	0	0	0	0	0	0	0	0	0	0	0	0	0	0	0	0	0	0	0	0	0	0	0	0	0	0	0	0	0	0	0	0	0	0	0	0	0	0	0	0	0	0	0	0	0	0
	Actinobacteria_Actinobacteria_Micrococcales_Micrococcaceae_Micrococcus_lylae	0	0	0	0	0	0	0	0	0	0	0	0	0	0	0	0	0	0	0	0	0	0	0	0	0	0	0	0	0	0	0	0	0	0	0	0	0	0	0	0	0	0	0	0	0	0	0	0
	Actinobacteria_Actinobacteria_Micrococcales_Micrococcaceae_Micrococcus_terreus	0	0	0	0	0	0	0	0	0	0	0	0	0	0	0	0	0	0	0	0	0	0	0	0	0	0	0	0	0	0	0	0	0	0	0	0	0	0	0	0	0	0	0	0	0	0	0	0
	Proteobacteria_Alphaproteobacteria_Rhizobiales_Methylobacteriaceae_Microvirga_aerophila	0	0	0	0	0	0	0	0	0	0	0	0	0	0	0	0	0	0	0	0	0	0	0	0	0	0	0	0	0	0	0	0	0	0	0	0	0	0	0	0	0	0	0	0	0	0	0	0
	Proteobacteria_Alphaproteobacteria_Rhizobiales_Methylobacteriaceae_Microvirga_lupini	0	0	0	0	0	0	0	0	0	0	0	0	0	0	0	0	0	0	0	0	0	0	0	0	0	0	0	0	0	0	0	0	0	0	0	0	0	0	0	0	0	0	0	0	0	0	0	0
	Unclassified Burkholderiales_____chitosanitabida	0	0	0	0	0	0	0	0	0	0	0	0	0	0	0	0	0	0	0	0	0	0	0	0	0	0	0	0	0	0	0	0	0	0	0	0	0	0	0	0	0	0	0	0	0	0	0	0
Cluster2	Firmicutes_Negativicutes_Selenomonadales_Selenomonadaceae_Mitsuokella_jalaludinii	0	0.000398926	0.000817297	0.015267001	0	0	0.004856529	0	0	0.003863647	0.005365412	0.010188477	0.005522338	0.001686374	0.000241239	0.00076637	7.04E-05	0.000750105	0.00263488	0.000247775	0.001946599	0.001537328	0.004290808	0.000416314	0.005147048	0.040843251	0.000305689	0.000661863	0.000537259	0.000330159	0.020436324	0.000680426	0.005605209	0.018004805	0.002080622	0.009620441	0.00032476	0.00271951	0.001276882	0.002324026	0	0	0.018761228	0.000155096	0.000361697	0.023823324	0	0.000141694
Cluster2	Firmicutes_Negativicutes_Selenomonadales_Selenomonadaceae_Mitsuokella_multacida	0.006706202	0.119056387	0.001597444	0.00428668	0	0	0.001767166	0.00016737	0.000592848	0.003376888	0.021129454	0.00340174	0.006934064	0.001434617	0.000855301	0.005783536	0.000246308	0.002385166	0.005549134	0.000114358	0.001816478	0.001651675	0.004387502	0.00128679	0.005311468	0.054172581	0	0.00649375	0.00544934	0.000279365	0.032955965	0.000453618	0.014925945	0.01744313	0.000327054	0.003557398	0	0.002838525	8.40E-05	0.001349069	0	0.013289889	0	0.000383178	0.063312375	0.011165303	0	0.002345829
	Firmicutes_Negativicutes_Selenomonadales_Selenomonadaceae_Mitsuokella_sp.	0	0	0	0	0	0	0	0	0	0	0	0	0	0	0	0	0	0	0	0	0	0	0	0	0	0	0	0	0	0	0	0	0	0	0	0	0	0	0	0	0	0	0	0	0	0	0	0
	Proteobacteria_Gammaproteobacteria_Pseudomonadales_Moraxellaceae_Moraxella_atlantae	0	0	0	0	0	0	0	0	0	0	0	0	0	0	0	0	0	0	0	0	0	0	0	0	0	0	0	0	0	0	0	0	0	0	0	0	0	0	0	0	0	0	0	0	0	0	0	0
	Proteobacteria_Gammaproteobacteria_Enterobacteriales_Enterobacteriaceae_Morganella_morganii	0	0	0	0	0	0	7.63E-05	0	0	0	0	0	0	0	0	0	0	0	0	0	0	0	0	0	0	0	0.000215781	0	0	0	0	0	0	0	0	0	0	0	0	0	0	0	0	0	0	0	0	0
	Firmicutes_Clostridia_Clostridiales_Lachnospiraceae_Moryella_indoligenes	0	0	0	0	0	0	0	0	0	0	0	0	0	0	0	0	0	0	0	0	0	0	0	0	0	0	0	0	0	0	0	0	0	0	0	0	0	0	0	0	0	0	0	0	0	0	0	0
	Bacteroidetes_Sphingobacteriia_Sphingobacteriales_Sphingobacteriaceae_Mucilaginibacter_boryungensis	0	0	0	0	0	0	0	0	0	0	0	0	0	0	0	0	0	0	0	0	0	0	0	0	0	0	0	0	0	0	0	0	0	0	0	0	0	0	0	0	0	0	0	0	0	0	0	0
	Deferribacteres_Deferribacteres_Deferribacterales_Deferribacteraceae_Mucispirillum_schaedleri	0	0	0	0	0	0	0	0	0	0	0	0	0	0	0	0	0	0	0	0	0	0	0	0	0	0	0	0	0	0	0	0	0	0	0	0	0	0	0	0	0	0	0	0	0	0	0	0
	Firmicutes_Tissierellia_Tissierellales_Peptoniphilaceae_Murdochiella_asaccharolytica	0	3.45E-05	0.002098967	0	0	0	7.63E-05	0	0	6.59E-05	0	0	0.001494768	0.000979056	0	0	0	5.90E-05	0	0	0.000109301	0.000101642	0	0	0	0	0	0	0	8.89E-05	0	0	0	0	0	0	0	0	0.000285618	0	0	0	0	0	0	0	0	0.000118079
	Firmicutes_Tissierellia_Tissierellales_Peptoniphilaceae_Murdochiella_sp.	0	0	0	0	0	0	0	0	0	0	0	0	0	0	0	0	0	0	0	0	0	0	0	0	0	0	0	0	0	0	0	0	0	0	0	0	0	0	0	0	0	0	0	0	0	0	0	0
	Proteobacteria_Alphaproteobacteria_Rhizobiales_Brucellaceae_Mycoplana_ramosa	0	0	0	0	0	0	0	0	0	0	0	0	0	0	0	0	0	0	0	0	0	0	0	0	0	0	0	0	0	0	0	0	0	0	0	0	0	0	0	0	0	0	0	0	0	0	0	0
	Firmicutes_Negativicutes_Veillonellales_Veillonellaceae_Negativicoccus_succinicivorans	0	0	0	0	0	0	0	0	0	0	0	0	0	0	0	0	0	0	0	0	0	0	0	0	0	0	0	0	0	0	0	0	0	0	0	0	0	0	0	0	0	0	0	0	0	0	0	0
	Proteobacteria_Betaproteobacteria_Neisseriales_Neisseriaceae_Neisseria_bacilliformis	0	0	0	0	0	0	0	0	0	0	0	0	0	0	0	0	0	0	0	0	0	0	0	0	0	0	0	0	5.37E-05	0	0	0	0	0	0	0	0	0	0	0.004806766	0	0	0	0	0	0	0	0
	Proteobacteria_Betaproteobacteria_Neisseriales_Neisseriaceae_Neisseria_canis	0	0	0	0	0	0	0	0	0	0	0	0	0	0	0	0	0	0	0	0	0	0	0	0	0	0	0	0	0	0	0	0	0	0	0	0	0	0	0	0	0	0	0	0	0	0	0	0
	Proteobacteria_Betaproteobacteria_Neisseriales_Neisseriaceae_Neisseria_cinerea	0	0	0	0	0	0	0	0	0	0	0	0	0	0	0	0	0	0	0	0	0	0	0	0	0	0	0	0	0	0	0	0	0	0	0	0	0	0	0	0	0	0	0	0	0	0.000153099	0	0
	Proteobacteria_Betaproteobacteria_Neisseriales_Neisseriaceae_Neisseria_elongata	0	0	0	0	0	0	0	0	0	0	0	0	0	0	0	0	0	0	0	0	0	0	0	0	0	0	0	0	0	0	0	0	0	0	0	0	0	0	0	0	0	0	0	0	0	0	0	0
	Proteobacteria_Betaproteobacteria_Neisseriales_Neisseriaceae_Neisseria_flavescens	0	0	0	0	0	0	0	0	0	0	0	0	0	0	0	0	0	0	0	0	0	0	0	0	0	0	0	0	0	0	0	0	0	0	0	0	0	0	0	0	0	0	0	0	0	0	0	0
	Proteobacteria_Betaproteobacteria_Neisseriales_Neisseriaceae_Neisseria_oralis	0	0	0	0	0	0	0	0	0	0	2.52E-05	0	0	0	0	0	0	0	0	0	6.77E-05	0	0	0	0	0	0	0	0	0	0	0	0	0	0	0	0	0	0	0	0	0	0	0	0.000415567	0	0	0
	Proteobacteria_Betaproteobacteria_Neisseriales_Neisseriaceae_Neisseria_perflava	0	0	0	0	0	0	0	0	0	0	0	0	0	0	0	0	0	0	0	0	0	0	0	0	0	0	0	0	0	0	0	0	0	0	0	0	0	0	0	0	0	0	0	0	0	0	0	0
	Proteobacteria_Betaproteobacteria_Neisseriales_Neisseriaceae_Neisseria_subflava	0	0	0	0	0	0	0	0	0	0	0	0	0	0	0	0	0	0	0	0	0	0	0	0	0	0	0	0	0	0	0	0	0	0	0	0	0	0	0	0	0	0	0	0	0	0	0	0
	Actinobacteria_Actinobacteria_Micrococcales_Micrococcaceae_Nesterenkonia_sp.	0	0	0	0	0	0	0	0	0	0	0	0	0	0	0	0	0	0	0	0	0	0	0	0	0	0	0	0	0	0	0	0	0	0	0	0	0	0	0	0	0	0	0	0	0	0	0	0
	Actinobacteria_Actinomycetales_Propionibacterineae_Nocardioidaceae_Nocardioides_daedukensis	0	0	0	0	0	0	0	0	0	0	0	0	0	0	0	0	0	0	0	0	0	0	0	0	0	0	0	0	0	0	0	0	0	0	0	0	0	0	0	0	0	0	0	0	0	0	0	0
	Actinobacteria_Actinomycetales_Propionibacterineae_Nocardioidaceae_Nocardioides_ginsengagri	0	0	0	0	0	0	0	0	0	0	0	0	0	0	0	0	0	0	0	0	0	0	0	0	0	0	0	0	0	0	0	0	0	0	0	0	0	0	0	0	0	0	0	0	0	0	0	0
	Actinobacteria_Actinomycetales_Propionibacterineae_Nocardioidaceae_Nocardioides_hwasunensis	0	0.000161105	0	0	0	0	0.000152561	0	0	0	0	0	0	0	0	0	0	0	0	0	0	0	0	0	0.000293096	0	0	0	0	0	0	0	0	0	0	0	0	0	0	0	0	0	0	0	0	0	0	0
	Actinobacteria_Actinomycetales_Propionibacterineae_Nocardioidaceae_Nocardioides_iriomotensis	0	0	0	0	0	0	0	0	0	0	0	0	0	0	0	0	0	0	0	0	0	0	0	0	0	0	0	0	0	0	0	0	0	0	0	0	0	0	0	0	0	0	0	0	0	0	0	0
	Actinobacteria_Actinomycetales_Propionibacterineae_Nocardioidaceae_Nocardioides_lianchengensis	0	0	0	0	0	0	0.000101707	0	0	0	0	3.91E-05	0	0	0	0	0	0	0	0	0	0	0	0	0.000114379	0	0	0	0	0	0	0	0	0	0	0	0	0	0	0	0	0	0	0	0	0	0	0
	Actinobacteria_Actinomycetales_Propionibacterineae_Nocardioidaceae_Nocardioides_sp.	0	0	0	0	0	0	0	0	0	0	0	0	0	0	0	0	0	0	0	0	0	0	0	0	0	0	0	0	0	0	0	0	0	0	0	0	0	0	0	0	0	0	0	0	0	0	0	0
	Proteobacteria_Alphaproteobacteria_Sphingomonadales_Sphingomonadaceae_Novosphingobium_acidiphilum	0	0	0	0	0	0	0	0	0	0	0	0	0	0	0	0	0	0	0	0	0	0	0	0	0	0	0	0	0	0	0	0	0	0	0	0	0	0	0	0	0	0	0	0	0	0	0	0
	Proteobacteria_Alphaproteobacteria_Sphingomonadales_Sphingomonadaceae_Novosphingobium_aromaticivorans	0	0	0	0	0	0	0	0	0	0	0	0	0	0	0	0	0	0	0	0	0	0	0	0	0	0	0	0	0	0	0	0	0	0	0	0	0	0	0	0	0	0	0	0	0	0	0	0
	Proteobacteria_Alphaproteobacteria_Sphingomonadales_Sphingomonadaceae_Novosphingobium_barchaimii	0	0	0	0	0	0	0	0	0	0	0	0	0	0	0	0	0	0	0	0	0	0	0	0	0	0	0	0	0	0	0	0	0	0	0	0	0	0	0	0	0	0	0	0	0	0	0	0
	Proteobacteria_Alphaproteobacteria_Sphingomonadales_Sphingomonadaceae_Novosphingobium_fuchskuhlense	0	0	0	0	0	0	0	0	0	0	0	0	0	0	0	0	0	0	0	0	0	0	0	0	0	0	0	0	0	0	0	0	0	0	0	0	0	0	0	0	0	0	0	0	0	0	0	0
	Proteobacteria_Alphaproteobacteria_Sphingomonadales_Sphingomonadaceae_Novosphingobium_lentum	0	0	0	0	0	0	0	0	0	0	0	0	0	0	0	0	0	0	0	0	0	0	0	0	0	0	0	0	0	0	0	0	0	0	0	0	0	0	0	0	0	0	0	0	0	0	0	0
	Proteobacteria_Alphaproteobacteria_Sphingomonadales_Sphingomonadaceae_Novosphingobium_nitrogenifigens	0	0	0	0	0	0	0	0	0	0	0	0	0	0	0	0	0	0	0	0	0	0	0	0	0	0	0	0	0	0	0	0	0	0	0	0	0	0	0	0	0	0	0	0	0	0	0	0
	Proteobacteria_Alphaproteobacteria_Sphingomonadales_Sphingomonadaceae_Novosphingobium_sediminicola	0	0	0	0	0	0	0.000355976	0	0	0	0	0	0	0	0	0	0	0	0	0	0	0	0	0	0	0	0	0	0	0	0	0	0	0	0	0	0	0	0	0	0	0	0	0	0	0	0	0
	Proteobacteria_Alphaproteobacteria_Sphingomonadales_Sphingomonadaceae_Novosphingobium_sp.	0	0	0	0	0	0	0	0	0	0	0	0	0	0	0	0	0	0	0	0	0	0	0	0	0	0	0	0	0	0	0	0	0	0	0	0	0	0	0	0	0	0	0	0	0	0	0	0
	Proteobacteria_Alphaproteobacteria_Sphingomonadales_Sphingomonadaceae_Novosphingobium_stygium	0	0	0	0	0	0	0	0	0	0	0	0	0	0	0	0	0	0	0	0	0	0	0	0	0	0	0	0	0	0	0	0	0	0	0	0	0	0	0	0	0	0	0	0	0	0	0	0
	Proteobacteria_Alphaproteobacteria_Sphingomonadales_Sphingomonadaceae_Novosphingobium_subterraneum	0	0	0	0	0	0	0.000241555	0	0	0	0	0	0	0	0	0	0	0	0	0	0	0	0	0	0	0	0	0	0	0	0	0	0	0	0	0	0	0	0	0	0	0	0	0	0	0	0	0
	Proteobacteria_Gammaproteobacteria_Enterobacteriales_Enterobacteriaceae_Obesumbacterium_proteus	0	0	0	0	0	0	0	0	0	0	0	0	0	0	0	0	0	0	0	0	0	0	0	0	0	0	0	0	0	0	0	0	0	0	0	0	0	0	0	0	0	0	0	0	0	0	0	0
	Firmicutes_Bacilli_Bacillales_Bacillaceae_Oceanobacillus_caeni	0	0	0	0	0	0	0	0	0	0	0	0	0	0	0	0	0	0	0	0	0	0	0	0	0	0	0	0	0	0	0	0	0	0	0	0	0	0	0	0	0	0	0	0	0	0	0	0
	Firmicutes_Bacilli_Bacillales_Bacillaceae_Oceanobacillus_chironomi	0	0	0	0	0	0	0	0	0	0	0	0	0	0	0	0	0	0	0	0	0	0	0	0	0	0	0	0	0	0	0	0	0	0	0	0	0	0	0	0	0	0	0	0	0	0	0	0
	Proteobacteria_Alphaproteobacteria_Rhizobiales_Brucellaceae_Ochrobactrum_oryzae	0	0	0	0	0	0	0	0	0	0	0	0	0	0	0	0	0	0	0	0	0	0	0	0	0	0	0	0	0	0	0	0	0	0	0	0	0	0	0	0	0	0	0	0	0	0	0	0
	Proteobacteria_Alphaproteobacteria_Rhizobiales_Brucellaceae_Ochrobactrum_pseudogrignonense	0	0	0	0	0	0	0	0	0	0	0	0	0	0	0	0	0	0	0	0	0	0	0	0	0	0	0	0	0	0	0	0	0	0	0	0	0	0	0	0	0	0	0	0	0	0	0	0
Cluster0	Bacteroidetes_Bacteroidia_Bacteroidales_Porphyromonadaceae_Odoribacter_splanchnicus	0	0	0	2.87E-05	0	0	0	0	0.000458336	5.07E-05	0	0.00125856	0.000921774	0.002289793	0	0	0.000211121	0	0.000591615	0.000285894	0.000176964	0.002909488	0	0.00823798	0.003002445	0	0	0	0	0	0	0	0	0	0	0.000371207	0.015458561	0.00067839	0	0	0	0.000384842	5.20E-05	0	0.006056502	8.20E-05	0.000189139	0
	Proteobacteria_Betaproteobacteria_Burkholderiales_Alcaligenaceae_Oligella_ureolytica	0	0	0	0	0	0	0	0	0	0	0	0	0	0	0	0	0	0	0	0	0	0	0	0	0	0	0	0	0	0	0	0	0	0	0	0	0	0	0	0	0	0	0	0	0	0	0	0
	Proteobacteria_Betaproteobacteria_Burkholderiales_Alcaligenaceae_Oligella_urethralis	0	0	0	0	0	0	0	0	0	0	0	0	0	0	0	0	0	0	0	0	0	0	0	0	0	0	0	0	0	0	0	0	0	0	0	0	0	0	0	0	0	0	0	0	0	0	0	0
	Actinobacteria_Coriobacteriia_Coriobacteriales_Atopobiaceae_Olsenella_genomosp.	0	0	0	0	0	0	0	0	0	0	0	0	0	0	0	0	0	0	0	0	0	0	0	0	0	0	0	0	0	0	0	0	0	0	0	0	0	0	0	0	0	0	0	0	0	0	0	0
	Actinobacteria_Coriobacteriia_Coriobacteriales_Atopobiaceae_Olsenella_sp.	0	0	0	0	0	0	0	0	0	0	0	0	0	0	0	0	0	0	0	0	0	0	0	0	0	0	0	0	0	0	0	0	0	0	0	0	0	0	0	0	0	0	0	0	0	0	0	0
	Actinobacteria_Coriobacteriia_Coriobacteriales_Atopobiaceae_Olsenella_umbonata	0.000546481	0	0	4.58E-05	0	0	0	0	0	4.56E-05	0	0	0.000390301	0	0	0	0	0	0	0	0	0	0	0	0	0	0	0	0	0	0	0	0	0	4.18E-05	0	0	0.000208278	0	0.002471403	0	0.000590092	0.001761753	0	0	0.000224181	0	0
	Verrucomicrobia_Opitutae_Opitutales_Opitutaceae_Opitutus_sp.	0	0	0	0	0	0	0	0	0	0	0	0	0	0	0	0	0	0	0	0	0	0	0	0	0	0	0	0	0	0	0	0	0	0	0	0	0	0	0	0	0	0	0	0	0	0	0	0
	Firmicutes_Clostridia_Clostridiales_Lachnospiraceae_Oribacterium_parvum	0	0	0	0	0	0	0	0	0	0	0	0	0	0	0	0	0	0	0	0	0	0	0	0	0	0	0	0	0	0	0	0	0	0	0	0	0	0	0	0	0	0	0	0	0	0	0	0
	Firmicutes_Clostridia_Clostridiales_Lachnospiraceae_Oribacterium_sinus	0	0	0	3.44E-05	0	0	0	0	0	0	0	0	0	0	0	0	0	6.74E-05	0	0	0.000166554	0	0	0	0	0	0	0	0	0	0	0	0	0	0	0	0	0	0	0.000453468	0	0	0	0	0	0	0	0
	Firmicutes_Clostridia_Clostridiales_Lachnospiraceae_Oribacterium_sp.	0	0	0	0	0	0	0	0	0	0.000152112	0	0	0	0	0	0	0	0	0.000624483	0	0.000733878	0	0	0	0	0	0	0	0	0	0	0	0	0	3.48E-05	0	0	0	0	0	0	0	0	0	0	2.73E-05	0	0
Cluster3	Firmicutes_Clostridia_Clostridiales_Oscillospiraceae_Oscillibacter_sp.	0.007475324	7.29E-05	0.006835575	0.000275081	0.001892766	0	0.004131864	0.003389235	0.003377739	8.11E-05	0	0.001710637	0.00266567	0.003688444	0.005592351	0.009554075	0.001548224	0	0.003829067	0.002674697	0.000796336	0	0	0.00288897	0.001165235	0.013584089	0.006356542	0.001523534	0	0.000114286	0.00171226	0.004536176	0.004277324	0	0.000612357	0.00222724	0	0.007343271	0.014936156	0.000487479	0.000592726	0	0.000387008	2.28E-05	0.000200088	0.015802021	0	0.002274982
	Firmicutes_Clostridia_Clostridiales_Oscillospiraceae_Oscillibacter_valericigenes	0	0	0	0	0	0	0	0	0	0	0	0	0	0	0	0	0	0	0	0	0	0	0	0	0	0	0	0	0	0	0	0	0	0	0	0	0	0	0	0	0	0	0	0	0	0	0	0
	Proteobacteria_Betaproteobacteria_Burkholderiales_Oxalobacteraceae_Oxalobacter_formigenes	0	0	0	8.02E-05	0.000100501	0	0	0	0	0.000116619	0	0	0	2.80E-05	0	0	0	0	9.86E-05	0	0	0	0	0	0	0	0	6.24E-05	0	0	0	0	0	0.00045246	0.000480144	0	0	0	0.00031922	0	0	0.000590092	0	0	0.000100044	7.11E-05	0	0
	Proteobacteria_Alphaproteobacteria_Rhodobacterales_Rhodobacteraceae_Pannonibacter_phragmitetus	0	0	0	0	0	0	0	0	0	0	0	0	0	0	0	0	0	0	0	0	0	0	0	0	0	0	0	0	0	0	0	0	0	0	0	0	0	0	0	0	0	0	0	0	0	0	0	0
	Proteobacteria_Gammaproteobacteria_Enterobacteriales_Enterobacteriaceae_Pantoea_agglomerans	0	0	0	0	0	0	0	0	0	0	0	0	0	0	0	0	0	0	0	0	0	0	0	0	0	0	0.000809178	0	0	0	0	0	0	0	0	0	0	0	0	0	0	0	0	0	0	0	0	0
	Proteobacteria_Gammaproteobacteria_Enterobacteriales_Enterobacteriaceae_Pantoea_ananatis	0	0	0	0	0	0	0	0	0	0	0	0	0	0	0	0	0	0	0	0	0	0	0	0	0	0	0	0	0	0	0	0	0	0	0	0	0	0	0	0	0	0	0	0	0	0	0	0
	Proteobacteria_Gammaproteobacteria_Enterobacteriales_Enterobacteriaceae_Pantoea_calida	0	0	0	0	0	0	0	0	0	0	0	0	0	0	0	0	0	0	0	0	0	0	0	0	0	0	0	0	0	0	0	0	0	0	0	0	0	0	0	0	0	0	0	0	0	0	0	0
	Proteobacteria_Gammaproteobacteria_Enterobacteriales_Enterobacteriaceae_Pantoea_sp.	0	0	0	0	0	0	0	0	0	7.10E-05	0	0	0	0	0	0	0	0	0	0	0	0	0	0	0	0	0	0	0	0	0	0	0	0	0	0	0	0	0	0	0	0	0	0	0	0	0	0
	Proteobacteria_Gammaproteobacteria_Enterobacteriales_Enterobacteriaceae_Pantoea_stewartii	0	0	0	0	0	0	0	0	0	0	0	0	0	0	0	0	0	0	0	0	0	0	0	0	0	0	0	0	0	0	0	0	0	0	0	0	0	0	0	0	0	0	0	0	0	0	0	0
Cluster0	Bacteroidetes_Bacteroidia_Bacteroidales_Porphyromonadaceae_Parabacteroides_distasonis	0.00018216	0.004280783	0.002628353	0	0	0	7.63E-05	0.000761532	0.000343752	0.001703655	0	0.003276163	0	0.000563457	0.006381859	0.000459822	0	0	0.00081621	0.001264287	0.000879613	0.0026935	0	0	0	0	0	0	0.000828914	0.000304762	0.000241731	0.000623724	0	0	0	0.000386674	0	0.000892618	0.010181452	0	0	0.000718372	0	0	0.00158531	0.002706575	0	0
	Bacteroidetes_Bacteroidia_Bacteroidales_Porphyromonadaceae_Parabacteroides_goldsteinii	0	0	0	0	0	0	0	0	0	0	0	0	0	0	0	0	0	0	0	0	0	0	0	0	0	0	0	0	0	0	0	0	0.00075332	0	0	0	0	0	0	0	0	0	0	0	0	0	0	0
	Bacteroidetes_Bacteroidia_Bacteroidales_Porphyromonadaceae_Parabacteroides_gordonii	0	0	0	0	0	0	0	0	0	0	0	0	0	0	0	0	0	0	0	0	0	0	0	0	0	0	0	0	0	0	0	0	0	0	0	0	0	0	0	0	0	0	0	0	0	0	0	0
	Bacteroidetes_Bacteroidia_Bacteroidales_Porphyromonadaceae_Parabacteroides_johnsonii	0	0	0	0	0	0	0	0	0	0	0	0	0	0	0	0	0	0	0	0	0	0	0	0	0	0	0	0	0	0	0	0	0	0	0	0	0	0	0	0	0	0	0	0	0	0	0	0
Cluster0	Bacteroidetes_Bacteroidia_Bacteroidales_Porphyromonadaceae_Parabacteroides_merdae	0.00124139	0.003509781	0.000306486	0	0.000636505	0	0.000355976	0.001380799	0.000463318	0.000167323	0.000558687	0.001297629	0.00215911	0.000599422	0.005702004	0.000633532	0.005852755	0.002570586	0.001468083	0.000641673	0.000801541	0.002922193	0.000290083	0.007417967	0.00340992	0.003093496	0	0	0.00089799	0.000266667	0.001631683	0.001488433	0	0.000140419	0	0.000696013	0.001493895	0.003963224	0.004385081	0.00075956	3.32E-05	0.000205249	0.005666491	0.006235773	0.002239443	0.000519444	0	0.000291261
	Bacteroidetes_Bacteroidia_Bacteroidales_Porphyromonadaceae_Parabacteroides_sp.	0	0	0	0	0	0	0	0	0	0	0	0	0	0	0	0	0	0	0	0	0	0	0	0	0	0	0	0	0	0	0	0	0	0	0	0	0	0	0	0	0	0	0	0	0	0	0	0
	Proteobacteria_Alphaproteobacteria_Rhodobacterales_Rhodobacteraceae_Paracoccus_aminophilus	0	0	0	0	0	0	0	0	0	0	0	0	0	0	0	0	0	0	0	0	0	0	0	0	0	0	0	0	0	0	0	0	0	0	0	0	0	0	0	0	0	0	0	0	0	0	0	0
	Proteobacteria_Alphaproteobacteria_Rhodobacterales_Rhodobacteraceae_Paracoccus_denitrificans	0	0	0.000287911	0	0	0	0	0	0	0	0	0	0	0	0	0	0	0	0	0	0	0	0	0	0	0	0	0	0	0	0	0	0	0	0	0	0	0	0	0	0	0	0	0	0	0	0	0
	Proteobacteria_Alphaproteobacteria_Rhodobacterales_Rhodobacteraceae_Paracoccus_koreensis	0	0	0	0	0	0	0	0	0	0	0	0	0	0	0	0	0	0	0	0	0	0	0	0	0	0	0	0	0	0	0	0	0	0	0	0	0	0	0	0	0	0	0	0	0	0	0	0
	Proteobacteria_Alphaproteobacteria_Rhodobacterales_Rhodobacteraceae_Paracoccus_limosus	0	0	0	0	0	0	0	0	0	0	0	0	0	0	0	0	0	0	0	0	0	0	0	0	0	0	0	0	0	0	0	0	0	0	0	0	0	0	0	0	0	0	0	0	0	0	0	0
	Proteobacteria_Alphaproteobacteria_Rhodobacterales_Rhodobacteraceae_Paracoccus_marcusii	0	0	0	0	0	0	0	0	0	0	0	0	0	0	0	0	0	0	0	0	0	0	0	0	0	0	0	0	0	0	0	0	0	0	0	0	0	0	0	0	0	0	0	7.75E-05	0	0	0	0
	Proteobacteria_Alphaproteobacteria_Rhodobacterales_Rhodobacteraceae_Paracoccus_sp.	0	0	0	0	0	0	0.000114421	0	0	0	0	1.67E-05	0	0	0	0	0	0	0	0	0	0	0	0	0	0	0	0	0	0	0	0	0	0	0	0	0.000584567	0	0	0	0	0	0	2.28E-05	0	0.00045383	0	0
	Proteobacteria_Alphaproteobacteria_Rhodobacterales_Rhodobacteraceae_Paracoccus_sphaerophysae	0	0	0	0	0	0	0.000114421	0	0	0	0	0	0	0	0	0	0	0	0	0	0	0	0	0	0	0	0	0	0	0	0	0	0	0	0	0	0	0	0	0	0	0	0	2.28E-05	0	0	0	0
	Proteobacteria_Alphaproteobacteria_Rhodobacterales_Rhodobacteraceae_Paracoccus_yeei	0	0	0	0	0	0	0	0	0	0	0	0	0	0	0	0	0	0	0	0	0	0	0	0	0	0	0	0	0	0	0	0	0	0	0	0	0	0	0	0	0	0	0	0	0	0	0	0
	Proteobacteria_Alphaproteobacteria_Rhodobacterales_Rhodobacteraceae_Paracoccus_zeaxanthinifaciens	0	0	0	0	0	0	0	0	0	0	0	0	0	0	0	0	0	0	0	0	0	0	0	0	0	0	0	0	0	0	0	0	0	0	0	0	0	0	0	0	0	0	0	0	0	0	0	0
	Actinobacteria_Coriobacteriia_Eggerthellales_Eggerthellaceae_Paraeggerthella_hongkongensis	0	0	0	0	0	0	0	0	0	0	0	0	0	0	0	0	0	0	0	0	0	0	0	0	0	0	0	0	0	0	0	0	0	0	0	0	0	0	0	0	0	0	0	0	0	0	0	0
	Bacteroidetes_Bacteroidia_Bacteroidales_Prevotellaceae_Paraprevotella_clara	0	0	0	0	0	0	0	0	0	0	0	0	0	0	0	0	0	0	0	0	0	0	0	0	0	0	0	0	0	0	0	0	0	0	0	0	0	0	0	0	0	0	0	0	0.001431397	0	0	0
	Bacteroidetes_Bacteroidia_Bacteroidales_Prevotellaceae_Paraprevotella_xylaniphila	0	0	0	0	0	0	0	0	0	0	0	0	0	0	0	0	0	0	0	0	0	0	0	0	0	0	0	0	0	0	0	0	0	0	0	0	0	0	0	0	0	0	0	0	0	0	0	0
	Actinobacteria_Actinobacteria_Bifidobacteriales_Bifidobacteriaceae_Parascardovia_denticolens	0	0	0	0	0	0	0	0	0	0	0	0	0	0	0	0	0	0	0	0	0	0	0	0	0	0	0	0	0	0	0	0	0	0	0	0	0	0	0	0	0	0	0	0	0	0	0	0
Cluster1	Proteobacteria_Betaproteobacteria_Burkholderiales_Sutterellaceae_Parasutterella_excrementihominis	0.015065342	0.002347526	0.009101716	0.003770903	0.013659738	0.109613137	0.003992016	0.000209212	0.000194295	0.001901401	0.000709684	0.005768168	0.016367713	0.004064082	0.000899162	0.091933704	0.003448316	0.064618626	0.001342091	0.001988552	0.049638266	0.01719012	0.002755787	0.010306937	0.00508271	0	0.03678163	0.000174832	0.00272467	0.00024127	0.007413078	0.005726922	0.000191522	0.007489001	0.000334013	0.002010703	0.016822551	0.012520456	0.000268817	0.002085955	0.270554281	0.000487467	9.24E-05	0.001920454	0.036523707	0.000973273	0	0.00639199
	Proteobacteria_Betaproteobacteria_Burkholderiales_Sutterellaceae_Parasutterella_secunda	0	0	0	0	0	0	0	0	0	0.000207887	0	1.95E-05	0	0	0	0	0	0	0	0	0	0	0	0	0	0	0	0	0	0	0	0	0	0	0	0	0	0	0	0	0	0	0	0	0	0	0	0
	Firmicutes_Tissierellia_Tissierellales_Peptoniphilaceae_Parvimonas_micra	0	0	0	0	0	0	0	0	0	0	0	0	0	0	0	0	0	0	0	0	0	0	0	0	0	0	0	0	0	0	0	0	0	0	0	0	0	0	0	0	0	0	0	0	0	0	6.68E-05	0
	Proteobacteria_Gammaproteobacteria_Pasteurellales_Pasteurellaceae_Pasteurella_pneumotropica	0	1.92E-05	0	0	0	0	0	0	0	0	0	0	0	0	0	0	0	0	0	0	0	0	0	0	0	0	0	0	0	0	0	0	0	0	0	0	0	0	0	0	0	0	0	0	0.000638742	0	0	0
	Proteobacteria_Gammaproteobacteria_Enterobacteriales_Enterobacteriaceae_Pectobacterium_carotovorum	0	0	0	0	0	0	0	0	0	0	0	0	0	0	0	0	0	0	0	0	0	0	0	0	0	0	0	0	0	0	0	0	0	0	0	0	0	0	0	0	0	0	0	0	0	0	0	0
	Firmicutes_Bacilli_Lactobacillales_Lactobacillaceae_Pediococcus_pentosaceus	0	0	0	0	0	0	0	0	0	0	0	0	0	0	0	0	0	0	0	0	0	0	0	0	0	0	0	0	0	0	0	0	0	0	0	0	0	0	0	0	0	0	0	0	0	0	0	0
	Proteobacteria_Alphaproteobacteria_Rhodobacterales_Rhodobacteraceae_Pelagicola_sp.	0	0	0	0	0	0	0	0	0	0	0	0	0	0	0	0	0	0	0	0	0	0	0	0	0	0	0	0	0	0	0	0	0	0	0	0	0	0	0	0	0	0	0	0	0	0	0	0
	Proteobacteria_Betaproteobacteria_Burkholderiales_Comamonadaceae_Pelomonas_aquatica	0	0	0	0	0	0	0	0	0	0	0	0	0	0	0	0	0	0	0	0	0	0	0	0	0	0	0	0	0	0	0	0	0	0	0	0	0	0	0	0	0	0	0	0	0	0	0	0
	Proteobacteria_Betaproteobacteria_Burkholderiales_Comamonadaceae_Pelomonas_puraquae	0	0	0	0	0	0	0	0	0	0	0	0	0	0	0	0	0	0	0	0	0	0	0	0	0	0	0	0	0	0	0	0	0	0	0	0	0	0	0	0	0	0	0	0	0	0	0	0
	Firmicutes_Clostridia_Clostridiales_Peptococcaceae_Peptococcus_niger	0	0	0.000232187	0	0	0	0	0	0	0	0	0	0	0	0	0	0	0	0	0	0	0	0	0	0	0	0	0	0	0	0	0	0	0	0	0	0	0	0	0	0	0	0	0	0	0	0	0
	Firmicutes_Clostridia_Clostridiales_Peptococcaceae_Peptococcus_sp.	0	0	0	0	0	0	0	0	0	0	0	0	0	0	0	0	0	0	0	0	0	0	0	0	0	0	0	0	0	0	0	0	0	0	0	0	0	0	0	0	0	0	0	0	0	0	0	0
	Firmicutes_Clostridia_Clostridiales_Peptoniphilaceae_Peptoniphilus_coxii	0	0	0	0	0	0	0	0	0	0	0	0	0	0	0	0	0	0	0	0	0	0	0	0	0	0	0	0	0	0	0	0	0	0	0	0	0	0	0	0	0	0	0	0	0	0	0	0
	Firmicutes_Clostridia_Clostridiales_Peptoniphilaceae_Peptoniphilus_duerdenii	0	0	0	0	0	0	0	0	0	0	0	0	0	0	0	0	0	0	0	0	0	0	0	0	0	0	0	0	0	0	0	0	0	0	0	0	0	2.98E-05	0	0	0	0	0	0	0	0	0	0
	Firmicutes_Clostridia_Clostridiales_Peptoniphilaceae_Peptoniphilus_koenoeneniae	0	0	0	0	0	0	0	0	0	0	0	0	0	0	0	0	0	0	0	0	0	0	0	0	0	0	0	0	0	0	0	0	0	0	0	0	0	2.98E-05	0	0	0	0	0	0	0	0	0	0
	Firmicutes_Clostridia_Clostridiales_Peptoniphilaceae_Peptoniphilus_lacrimalis	0	0	0	0	0	0	0	0	0	0	0	0	0	0	0	0	0	0	0	0	0	0	0	0	0	0	0	0	0	0	0	0	0	0	0	0	0	0	0	0	0	0	0	0	0	0	0	0
	Firmicutes_Clostridia_Clostridiales_Peptoniphilaceae_Peptoniphilus_Peptoniphilus	0	0	0	0	0	0	0	0	0	0	0	0	0	0	0	0	0	0	0	0	0	0	0	0	0	0	0	0	0	0	0	0	0	0	0	0	0	0	0	0	0	0	0	0	0	0	0	0
	Firmicutes_Clostridia_Clostridiales_Peptostreptococcaceae_Peptostreptococcus_anaerobius	0	0	0	0	0	0	0	0	0	0	0	0	0	0	0	0	0	0	0	0	0	0	0	0	0	0	0	0	0	0	0	0	0	0	0	0	0	7.74E-05	0	0	0	0	0	0	0	0	0	0
	Firmicutes_Clostridia_Clostridiales_Peptostreptococcaceae_Peptostreptococcus_russellii	0	3.84E-05	0	0	0	0	0	0	0	0	0	0	0	0	0	0	0	0	0	0	0	0	0	0	0	0	0	0	0	0	0	0	0	0	0	0	0	0	0	0	0	0	0	0	0	0	0	0
Cluster1	Firmicutes_Clostridia_Clostridiales_Peptostreptococcaceae_Peptostreptococcus_stomatis	0.0001012	0.000675105	0.000445798	0	0.000929633	0.001765247	0	8.37E-05	0.00080707	0.00012676	0	0.000354406	0.001619332	8.79E-05	0	0	8.21E-05	0.001112516	0	0	9.37E-05	0	0.003178824	0.002283422	0	0.001328384	0.000494498	0	0.000460508	0	0	0	0	0	0	0	0	0.000368949	8.40E-05	0	0	0.000179593	9.82E-05	0.000333	0.000177001	0	0	0.002896862
	Proteobacteria_Hydrogenophilalia_Hydrogenophilales_Hydrogenophilaceae_Petrobacter_succinatimandens	0	0	0	0	0	0	0	0	0	0	0	0	0	0	0	0	0	0	0	0	0	0	0	0	0	0	0	0	0	0	0	0	0	0	0	0	0	0	0	0	0	0	0	0	0	0	0	0
	Firmicutes_Negativicutes_Acidaminococcales_Acidaminococcaceae_Phascolarctobacterium_faecium	0.000148427	0.00181051	0	0	0	0	0.001245916	0.000125527	0	0.000603378	0.000266761	0.000424171	0	0.000223784	0	0.000112401	0.000539532	0.000176991	4.38E-05	0.000101651	0.000556915	0	0	0	0.002194644	0	0.000926059	0	0.011842721	0.000152381	0.040570485	0	0	0.00029644	8.35E-05	0.000742413	0.004221876	0.002172037	0	0	0	0	0	0	4.62E-05	0.001044355	0.000222516	0
	Firmicutes_Negativicutes_Acidaminococcales_Acidaminococcaceae_Phascolarctobacterium_sp.	0	0	0	0	0	0	0	0	0	0	0	0.000320919	0	0	0	0	0.000281495	0	0	0	0	0	0	0	0	0	0	0	0	0	0	0	0	0	0	0	0	0.004724925	0	0.004296614	0	0	0.00125922	0	0	0	0	0
Cluster3	Firmicutes_Negativicutes_Acidaminococcales_Acidaminococcaceae_Phascolarctobacterium_succinatutens	0.003562248	0.000398926	0.003018426	0.002252226	0	0	7.63E-05	0	0	0.001034362	0	0.000145111	0.000747384	0.000431584	0	0.006202485	0.000140748	0	0.000136948	0	0.000338313	0	0	0	0.000171568	0	0	0.00111143	0.000406782	0	0	0	0.000944842	0.000265235	0.000257468	0.000216537	0	0.001463894	0	0	0	0	0	0.000255452	0	0	0	0
	Proteobacteria_Alphaproteobacteria_Caulobacterales_Caulobacteraceae_Phenylobacterium_falsum	0	0	0	0	0	0	0	0	0	0	0	0	0	0	0	0	0	0	0	0	0	0	0	0	0	0	0	0	0	0	0	0	0	0	0	0	0	0	0	0	0	0	0	0	0	0	0	0
	Proteobacteria_Alphaproteobacteria_Caulobacterales_Caulobacteraceae_Phenylobacterium_koreense	0	0	0	0	0	0	0	0	0	0	0	0	0	0	0	0	0	0	0	0	0	0	0	0	0	0	0	0	0	0	0	0	0	0	0	0	0	0	0	0	0	0	0	0	0	0	0	0
	Proteobacteria_Alphaproteobacteria_Caulobacterales_Caulobacteraceae_Phenylobacterium_sp.	0	0	0	0	0	0	0	0	0	0	0	0	0	0	0	0	0	0	0	0	0	0	0	0	0	0	0	0	0	0	0	0	0	0	0	0	0	0	0	0	0	0	0	0	0	0	0	0
	Proteobacteria_Gammaproteobacteria_Vibrionales_Vibrionaceae_Photobacterium_damselae	0	0	0	0	0	0	0.000266982	5.86E-05	0	0.001252389	0	0	0	0	0	0	0	0	0	0	0	0	0	0	0	0	0	0	0	0	0	0	0	0	0	0	0	0	0	0	0	0	0	0	0	0	0	0
	Proteobacteria_Gammaproteobacteria_Vibrionales_Vibrionaceae_Photobacterium_indicum	0	0	0	0	0	0	0	0	0	0	0	0	0	0	0	0	0	0	0	0	0	0	0	0	0	0	0	0	0	0	0	0	0	0	0	0	0	0	0	0	0	0	0	0	0	0	0	0
	Actinobacteria_Actinobacteria_Micrococcales_Dermatophilaceae_Piscicoccus_intestinalis	0	0	0	0	0	0	0	0	0	0	0	0	0	0	0	0	0	0	0	0	0	0	0	0	0	0	0	0	0	0	0	0	0	0	0	0	0	0	0	0	0	0	0	0	0	0	0	0
	Unclassified Burkholderiales_____aquaticus	0	0	0	0	0	0	8.90E-05	0	0	0	0	0	0	0	0	0	0	0	0	0	0	0	0	0	0	0	0	0	0	0	0	0	0	0	0	0	0	0	0	0	0	0	0	0	0	0	0	0
	Proteobacteria_Gammaproteobacteria_Enterobacteriales_Enterobacteriaceae_Plesiomonas_shigelloides	0	0	0	0	0	0	0	0	0	0	0.000387558	0	0	0	0	0.000245238	0	0	0	0.00049555	0	0	0	0	0	0	0	0	0	0	0	0	0	0	0	0	0	0	0	0	0	0	0	0	0	0	0	0
	Proteobacteria_Gammaproteobacteria_Enterobacteriales_Enterobacteriaceae_Pluralibacter_gergoviae	0	0	0	0	0	0	0	0	0	0	0	0	0	6.79E-05	0	0	0	0	0	0	0	0	0	0	0	0	0	0	0	0	0	0	0	0	0	0	0	0	0	0	0	0	0	0	0	0	0	0
	Proteobacteria_Gammaproteobacteria_Enterobacteriales_Enterobacteriaceae_Pluralibacter_pyrinus	0	0	0	0	0	0	0	0	0	0	0	0	0	0	0	0	0	0	0	0	0	0	0	0	0	0	0	0	0	0	0	0	0	0	0	0	0	0	0	0	0	0	0	0	0	0	0	0
	Proteobacteria_Alphaproteobacteria_Sphingomonadales_Erythrobacteraceae_Porphyrobacter_tepidarius	0	0	0	0	0	0	0	0	0	0	0	0	0	0	0	0	0	0	0	0	0	0	0	0	0	0	0	0	0	0	0	0	0	0	0	0	0	0	0	0	0	0	0	0	0	0	0	0
	Bacteroidetes_Bacteroidia_Bacteroidales_Porphyromonadaceae_Porphyromonas_asaccharolytica	0	0	0	0	0	0	0	0	0	0	0	0	0	0	0	0	0	0	0	0	0	0	0	0	0	0	0	0	0	0	0	0	0	0	0	0	0	0	0	0	0	0	0	0	0	0	0	0
	Bacteroidetes_Bacteroidia_Bacteroidales_Porphyromonadaceae_Porphyromonas_bennonis	0	0	0	0	0	0	0	0	0	0	0	0	0	0	0	0	0	0	0	0	0	0	0	0	0	0	0	0	0	0	0	0	0	0	0	0	0	0	0	0	0	0	0	0	0	0	0	0
	Bacteroidetes_Bacteroidia_Bacteroidales_Porphyromonadaceae_Porphyromonas_endodontalis	0	0	0	0	0	0	0	0	0	0	0	0	0	0	0	0	0	0	0	0	0	0	0	0	0	0	0	0	0	0	0	0	0	0	0	0	0	0	0	0	0	0	0	0	0	0	0	0
	Bacteroidetes_Bacteroidia_Bacteroidales_Porphyromonadaceae_Porphyromonas_gingivalis	0	0	0	0	0	0	0	0	0	0	0	0	0	0	0	0	0	0	0	0	0	0	0	0	0	0	0	0	0	0	0	0	0	0	0	0	0	0	0	0	0	0	0	0	0	0	0	0
	Bacteroidetes_Bacteroidia_Bacteroidales_Porphyromonadaceae_Porphyromonas_uenonis	0	0	0	0	0	0	0	0	0	0	0	0	0	0	0	0	0	0	0	0	0	0	0	0	0	0	0	0	0	0	0	0	0	0	0	0	0	0	0	0	0	0	0	0	0	0	0	0
	Bacteroidetes_Bacteroidia_Bacteroidales_Prevotellaceae_Prevotella_bivia	0	0	0	0	0	0	0	0	0	0	0	0	0	0	0	0	0	0	0	0	0	0	0	0	0	0	0	0	0	0	0	0	0	0	0	0	0	0	0	0	0	0	0	0	0	0	0	0
	Bacteroidetes_Bacteroidia_Bacteroidales_Prevotellaceae_Prevotella_buccae	0	0	0	0	0	0	0	0	0	0	0	0	0	0	0	0	0	0	0	0	0	0	0	0	0	0	0	0	0	0	0	0	0	0	0	0	0	0	0	0	0	0	0	0	0	0	0	0
	Bacteroidetes_Bacteroidia_Bacteroidales_Prevotellaceae_Prevotella_buccalis	0	0	0	0	0	0	0	0	0	0	0	0	0	0	0	0	0	0	0	0	0	0	0	0	0	0	0	0	0	0	0	0	0	0	0	0	0	0	0	0	0	0	0	0	0	0	0	0
Cluster0	Bacteroidetes_Bacteroidia_Bacteroidales_Prevotellaceae_Prevotella_copri	0.341948847	0.068757192	0.352960844	0.46264628	0.308554296	0.307855349	0.344076179	0.425528888	0.506705658	0.30508105	0.327139118	0.549254073	0.254459392	0.581571365	0.534519058	0.038563721	0.231869949	0.177724399	0.56240174	0.592346936	0.519273409	0.287734411	0.379512903	0.374960576	0.475487182	0.399179314	0.113896281	0.514654645	0.348865232	0.581663492	0.29221224	0.543703221	0.36386619	0.453490186	0.507497895	0.723466452	0.192777345	0.470409712	0.442523522	0.087927536	0.417683163	0.491161454	0.641231956	0.509932989	0.280938565	0.404744981	0.425151033	0.173260702
	Bacteroidetes_Bacteroidia_Bacteroidales_Prevotellaceae_Prevotella_corporis	0	0	0	0	0	0	0	0	0	0	0	0	0	0	0	0	0	0	0	0	0	0	0	0	0	0	0	0	0	0	0	0	0	0	0	0	0	0	0	0	0	0	0	0	0	0	0	0
	Bacteroidetes_Bacteroidia_Bacteroidales_Prevotellaceae_Prevotella_disiens	0	0	0	0	0	0	0	0	0	0.000141971	0	0	0	0	0	0	0	0	0	0	0	0	0	0	0	0	0	0	0	0	0	0	0	0	0	0	0	0	0	0	0	0	0	0	0	0	0	0
	Bacteroidetes_Bacteroidia_Bacteroidales_Prevotellaceae_Prevotella_histicola	0	0	0	0	0	0	0	0	0	0	0	0	0	0	0	0	0	0	0	0	0	0	0	0	0	0	0	0	0	0	0	0	0	0	0	0	0	0	0	0	0	0	0	0	0	0	0	0
	Bacteroidetes_Bacteroidia_Bacteroidales_Prevotellaceae_Prevotella_intermedia	0	0	0	0	0	0	0	0	0	0	0	0	0	0	0	0	0	0	0	0	0	0	0	0	0	0	0	0	0	0	0	0	0	0	0	0	0	0	0	0	0	0	0	0	0	0	0	0
	Bacteroidetes_Bacteroidia_Bacteroidales_Prevotellaceae_Prevotella_maculosa	0	0	0	0	0	0	0	0	0	0	0	0	0	0	0	0	0	0	0	0	0	0	0	0	0	0	0	0	0	0	0	0	0	0	0	0	0	0	0	0	0	0	0	0	0	0	0	0
	Bacteroidetes_Bacteroidia_Bacteroidales_Prevotellaceae_Prevotella_nanceiensis	0	0	0	0	0	0	0	0	0	0	0	0	0	0	0	0	0	0	0	0	0	0	0	0	0	0	0	0	0	0	0	0	0	0	0	0	0	0	0	0	0	0	0	0	0	0	0	0
	Bacteroidetes_Bacteroidia_Bacteroidales_Prevotellaceae_Prevotella_nigrescens	0	0	0	0	0	0	0	0	0	0	0	0	0	0	0	0	0	0	0	0	0	0	0	0	0	0	0	0	0	0	0	0	0	0	0	0	0	0	0	0	0	0	0	0	0	0	0	0
	Bacteroidetes_Bacteroidia_Bacteroidales_Prevotellaceae_Prevotella_pallens	0	0	0	0	0	0	0	0	0	0	0	0	0	0	0	0	0	0	0	0	0	0	0	0	0	0	0	0	0	0	0	0	0	0	0	0	0	0	0	0	0	0	0	0	0	0	0	0
	Bacteroidetes_Bacteroidia_Bacteroidales_Prevotellaceae_Prevotella_ruminicola	0	0	0	0	0	0	0	0	0	0	0	0	0	0	0	0	0	0	0	0	0	0	0	0	0	0	0	0	0	0	0	0	0	0	0	0	0	0	0	0	0	0	0	0	0	0	0	0
	Bacteroidetes_Bacteroidia_Bacteroidales_Prevotellaceae_Prevotella_sp.	0	0	0	0	0	0	0.000419543	0.000845217	0	5.07E-05	0.000150997	0	0	0.000615407	0	0	0.001290186	0	0.001227054	0.000266834	9.37E-05	0	0	0	0.000171568	0	0	0.015235336	0	0	0	0	0	0	0.093544504	0	0	0	0	0	0	0	0	0	0.002077834	0.003138533	0	0
Cluster2	Bacteroidetes_Bacteroidia_Bacteroidales_Prevotellaceae_Prevotella_stercorea	0.026446995	0.000490986	0.018064121	0.02456818	0.012989732	0.013705527	0.019756665	0.019607351	0.02410749	0.031517622	0.01970002	0.02417775	0.011717323	0.037036297	0.016579675	0.002145835	0.024830223	0.024096081	0.040991285	0.022331497	0.019518035	0.015284342	0.026784311	0.036787061	0.051370402	0.014666812	0.010429404	0.036777102	0.014743919	0.040774603	0.019529834	0.029882059	0.021092952	0.033170032	0.017758356	0.043554923	0.028448948	0.004713023	0.012449597	0.006631976	0.006514441	0.009441465	0.01760598	0.025777875	0	0.015949652	0.008633638	0.003408536
	Bacteroidetes_Bacteroidia_Bacteroidales_Prevotellaceae_Prevotella_timonensis	0	0	0	0	0	0	0	0	0	0	0	0	0	0	0	0	0	0	0	0	0	0	0	0	0	0	0	0	0	0	0	0	0	0	0	0	0	0	0	0	0	0	0	0	0	0	0	0
	Actinobacteria_Actinomycetales_Propionibacterineae_Propionibacteriaceae_Propionibacterium_acnes	0	0	0	7.45E-05	0	0	0	0	0	0	0	0	0	0	0	0	0	0	0	0	0	0	0	0	0	0	0	0	0	0	0	0	0	0	0	0	0	0	0	0	0	0	0	0	0	0	0	0
	Verrucomicrobia_Verrucomicrobiae_Verrucomicrobiales_Verrucomicrobiaceae_Prosthecobacter_vanneervenii	0	0	0	0	0	0	7.63E-05	0	0	0	0	0	0	0	0	0	0	0	0	0	0	0	0	0	0	0	0	0	0	0	0	0	0	0	0	0	0	0	0	0	0	0	0	0	0	0	0	0
	Proteobacteria_Betaproteobacteria_Burkholderiales_Comamonadaceae_Pseudacidovorax_intermedius	0	0	0	0	0	0	0	0	0	0	0	0	0	0	0	0	0	0	0	0	0	0	0	0	0	0	0	0	0	0	0	0	0	0	0	0	0	0	0	0	0	0	0	0	0	0	0	0
	Firmicutes_Clostridia_Clostridiales_Lachnospiraceae_Pseudobutyrivibrio_ruminis	0	0	0	0	0	0	0	0	0	0	0	0	0	0	0	0	0.06687857	0	0	0	0	0	0	0	0	0	0	0	0	0	0	0	0	0	0	0	0	0	0	0	0	0	0	0	0	0.008491536	0	0
	Actinobacteria_Actinobacteria_Micrococcales_Microbacteriaceae_Pseudoclavibacter_bifida	0	0	0	0	0	0	0	0	0	0	0	0	0	0	0	0	0	0	0	0	0	0	0	0	0	0	0	0	0	0	0	0	0	0	0	0	0	0	0	0	0	0	0	0	0	0	0	0
	Proteobacteria_Betaproteobacteria_Burkholderiales_Oxalobacteraceae_Pseudoduganella_violaceinigra	0	0	0	0	0	0	0	0	0	0	0	0	0	0	0	0	0	0	0	0	0	0	0	0	0	0	0	0	0	0	0	0	0	0	0	0	0	0	0	0	0	0	0	0	0	0	0	0
	Firmicutes_Clostridia_Clostridiales_Clostridiales_Pseudoflavonifractor_capillosus	0	0	0	0	0	0	0	0	0	0	0	0	0	0	0	0	0	0	0	0	0	0	0	0	0	0	0	0	0.000191878	0	0.002588534	0	0	0	0	0	0	8.93E-05	0	0	0	0	0	0	0	0	6.68E-05	0
	Proteobacteria_Betaproteobacteria_Neisseriales_Chromobacteriaceae_Pseudogulbenkiania_subflava	0	0	0	0	0	0	0	0	0	0	0	0	0	0	0	0	0	0	0	0	0	0	0	0	0	0	0	0	0	0	0	0	0	0	0	0	0	0	0	0	0	0	0	0	0	0	0	0
	Proteobacteria_Gammaproteobacteria_Pseudomonadales_Pseudomonadaceae_Pseudomonas_aeruginosa	0	0	0	0	0	0	0	0	0	0	0	0	0	0	0	0	0	0	0	0	0	0	0	0	0	0	0	0	0	0	0	0	0	0	0	0	0	0	0	0	0	0	0	0	0	0	0	0
	Proteobacteria_Gammaproteobacteria_Pseudomonadales_Pseudomonadaceae_Pseudomonas_alcaligenes	0	0	0	0	0	0	0	0	0	0	0	0	0	0	0	0	0	0	0	0	0	0	0	0	0	0	0	0	0	0	0	0	0	0	0	0	0.001428943	0	0	0	0	0	0	0	0	0	0	0
	Proteobacteria_Gammaproteobacteria_Pseudomonadales_Pseudomonadaceae_Pseudomonas_bacterium	0	0	0	0	0	0	0	0	0	0	0	0	0	0	0	0	0	0	0	0	0	0.00031763	0	0	0	0	0	0	0	0	0	0	0	0	0	0	0	0	0	0	0	0	0	0	0	0	0	0
	Proteobacteria_Gammaproteobacteria_Pseudomonadales_Pseudomonadaceae_Pseudomonas_balearica	0	0	0	0	0	0	8.90E-05	0	0	0	0	0	0	0	0	0	0	0	0	0	0	0	0	0	0	0	0	0	0	0	0	0	0	0	0	0	0	0	0	0	0	0	0	0	0	0	0	0
	Proteobacteria_Gammaproteobacteria_Pseudomonadales_Pseudomonadaceae_Pseudomonas_caeni	0	0	0	0	0	0	0	0	0	0	0	0	0	0	0	0	0	0	0	0	0	0	0	0	0	0	0	0	0	0	0	0	0	0	0	0	0	0	0	0	0	0	0	0	0	0	0	0
	Proteobacteria_Gammaproteobacteria_Pseudomonadales_Pseudomonadaceae_Pseudomonas_cannabina	0	0	0	0	0	0	0	0	0	0	0	0	0	0	0	0	0	0	0	0	0	0.000127052	0	0	0	0	0	0	0	0	0	0	0	0	0	0	0	0	0	0	0	0	0	0	0	0	0	0
	Proteobacteria_Gammaproteobacteria_Pseudomonadales_Pseudomonadaceae_Pseudomonas_deceptionensis	0	0	0	0	0	0	0	0	0	0.000157182	0	0	0	0	0	0	0	0	0	0	0	0	0	0	0	0	0	0	0	0	0	0	0	0	0	0	0	0	0	0	0	0	0	0	0	0	0	0
	Proteobacteria_Gammaproteobacteria_Pseudomonadales_Pseudomonadaceae_Pseudomonas_formosensis	0	0	0	0	0	0	0	0	0	0	0	0	0	0	0	0	0	0	0	0	0	0	0	0	0	0	0	0	0	0	0	0	0	0	0	0	0	0	0	0	0	0	0	0	0	0	0	0
	Proteobacteria_Gammaproteobacteria_Pseudomonadales_Pseudomonadaceae_Pseudomonas_hibiscicola	0	0	0	0	0	0	0	0	0	0	0	2.79E-05	0	0	0	0	0	0	0	0	0	0	0	0	0	0	0	0	0	0	0	0	0	0	0	0	0	0	0	0	0	0	0	0	0	0	0	0
Cluster4	Proteobacteria_Gammaproteobacteria_Pseudomonadales_Pseudomonadaceae_Pseudomonas_lini	0	0	0.002535478	0.00073355	0	0	0	0	0	0.000299154	0.000996577	0	0.00011626	0.000351661	0.000175446	0.008470939	0.001430934	0.002157606	7.12E-05	0.000171536	0.000114506	0.002833257	0	0	0	0	0.001312666	0	0	0	0.004401515	0	0	0	0	0	0	0	0	0.004466664	0	0	0	0	0	0.000836578	0	0.000834422
	Proteobacteria_Gammaproteobacteria_Pseudomonadales_Pseudomonadaceae_Pseudomonas_litoralis	0	0	0	0	0	0	0	0	0	0	0	0	0	0	0	0	0	0	0	0	0	0	0	0	0	0	0	0	0	0	0	0	0	0	0	0	0	0	0	0	0	0	0	0	0	0	0	0
	Proteobacteria_Gammaproteobacteria_Pseudomonadales_Pseudomonadaceae_Pseudomonas_otitidis	0	0	0	0	0	0	0	0	0	0	0	0	0	0	0	0	0	0	0	0	0	0	0	0	0	0	0	0	0	0	0	0	0	0	0	0	0	0	0	0	0	0	0	0	0	0	0	0
	Proteobacteria_Gammaproteobacteria_Pseudomonadales_Pseudomonadaceae_Pseudomonas_pachastrellae	0	0	0	0	0	0	0	0	0	0	0	0	0	0	0	0	0	0	0	0	0	0	0	0	0	0	0	0	0	0	0	0	0	0	0	0	0	0	0	0	0	0	0	0	0	0	0	0
	Proteobacteria_Gammaproteobacteria_Pseudomonadales_Pseudomonadaceae_Pseudomonas_psychrotolerans	0	0	0	0	0	0	0	0	0	0	0	0	0	0	0	0	0	0	0	0	0	0	0	0	0	0	0	0	0	0	0	0	0	0	0	0	0	0	0	0	0	0	0	0	0	0	0	0
	Proteobacteria_Gammaproteobacteria_Pseudomonadales_Pseudomonadaceae_Pseudomonas_putida	0	0	0	0	0	0	0	0	0	0	0	0	0	0	0	0	0	0	0	0	0	0	0	0	0	0	0	0	0	0	0	0	0	0	0	0	0	0	0	0	0	0	0	0	0	0	0	0
	Proteobacteria_Gammaproteobacteria_Pseudomonadales_Pseudomonadaceae_Pseudomonas_seleniipraecipitans	0	0	0	0	0	0	0	0	0	0	0	0	0	0	0	0	0	0	0	0	0	0	0	0	0	0	0	0	0	0	0	0	0	0	0	0	0	0	0	0	0	0	0	0	0	0	0	0
	Proteobacteria_Gammaproteobacteria_Pseudomonadales_Pseudomonadaceae_Pseudomonas_sp.	0	0	0	3.44E-05	0	0	0	0	0	0	0	0	0	0	0	0	0	0	0	0	0	0	0	0	0	0	0	0	0	0	0	0	0	0	0	0	0	0	0	0	0	0	0	0	0	0	0	0
	Proteobacteria_Gammaproteobacteria_Pseudomonadales_Pseudomonadaceae_Pseudomonas_stutzeri	0.001106456	3.45E-05	0	0	0.000150751	0	0.000241555	0	0.000288951	0	0	6.14E-05	0	0	0	0	0	0	0	0	0	0	0	0	0.000579043	0.000409433	8.99E-05	0	0	0	0	0	0	0	0	0	0	0.000101163	0	0	0	0	0	8.67E-05	0	0	0	0
	Proteobacteria_Gammaproteobacteria_Pseudomonadales_Pseudomonadaceae_Pseudomonas_veronii	0	0	0	0	0	0	0	0	0	0	0	0	0	0	0	0	0	0	0	0	0	0	0	0	0	0	0	0	0	0	0	0	0	0	0	0	0	0	0	0	0	0	0	0	0	0	0	0
	Proteobacteria_Gammaproteobacteria_Pseudomonadales_Pseudomonadaceae_Pseudomonas_xanthomarina	0	0	0	0	0	0	0	0	0	0	0	0	0	0	0	0	0	0	0	0	0	0	0	0	0	0	0	0	0	0	0	0	0	0	0	0	0	0	0	0	0	0	0	0	0	0	0	0
	Proteobacteria_Gammaproteobacteria_Pseudomonadales_Pseudomonadaceae_Pseudomonas_xiamenensis	0	0	0	0	0	0	0	0	0	0	0	0	0	0	0	0	0	0	0	0	0	0	0	0	0	0	0	0	0	0	0	0	0	0	0	0	0	0	0	0	0	0	0	0	0	0	0	0
	Firmicutes_Clostridia_Clostridiales_Eubacteriaceae_Pseudoramibacter_alactolyticus	0	0	0	0	0	0	0	0	0	0	0	0	0	0	0	0	0	0	0	0	0	0	0	0	0	0	0	0	0	0	0	0	0	0	0	0	0	0	0	0	0	0	0	0	0	0	0	0
	Proteobacteria_Gammaproteobacteria_Lysobacteriales_Lysobacteraceae_Pseudoxanthomonas_sp.	0	0	0	0	0	0	0.000152561	0	0	0	0.00012583	0	0	0	0	0	0	0	0	0	0	0	0	0	9.29E-05	8.19E-05	0	0	0	0	0	0	0	0	0	0	0	0	0	0	8.86E-05	0	0	0	0	4.92E-05	0	0
	Proteobacteria_Gammaproteobacteria_Lysobacteriales_Lysobacteraceae_Pseudoxanthomonas_spadix	0	0	0	0	0	0	0.000152561	0	0	0	0.00012583	0	0	0	0	0	0	0	0	0	0	0	0	0	9.29E-05	8.19E-05	0	0	0	0	0	0	0	0	0	0	0	0	0	0	8.86E-05	0	0	0	0	0	0	0
	Proteobacteria_Gammaproteobacteria_Lysobacteriales_Lysobacteraceae_Pseudoxanthomonas_taiwanensis	0	0	0	0	0	0	0	0	0	0	0	0	0	0	0	0	0	0	0	0	0	0	0	0	0	0	0	0	0	0	0	0	0	0	0	0	0	0	0	0	0	0	0	0	0	0	0	0
	Synergistetes_Synergistia_Synergistales_Synergistaceae_Pyramidobacter_piscolens	0	0	0	0	0	0	0	0	0	0	0	0	0	0	0	0	0	0	0	0	0	0	0	0	0	0	0	0	0	0	0.000302163	0	0	0	0	0	0	0	0	0	0	0	0	0	0	0	0	0.000283389
	Proteobacteria_Betaproteobacteria_Burkholderiales_Burkholderiaceae_Ralstonia_pickettii	0	0	0	0	0	0	0.000648385	0	0	0	0	0	0	0	0	0	0	0	0	0	0	0	0	0	4.29E-05	0.000254759	0	0	0	0	0	0	0	0	0	0	0	0.000464161	0	0	0	0	0	0	0	0	0	0
	Proteobacteria_Betaproteobacteria_Burkholderiales_Comamonadaceae_Ramlibacter_tataouinensis	0	0	0	0	0	0	0	0	0	0	0	0	0	0	0	0	0	0	0	0	0	0	0	0	0	0	0	0	0	0	0	0	0	0	0	0	0	0	0	0	0	0	0	0	0	0	0	0
	Proteobacteria_Gammaproteobacteria_Enterobacteriales_Enterobacteriaceae_Raoultella_ornithinolytica	0	0	0	0	0	0	0	0	0	0	0.000488222	0	0	0	0	0	0	0	0	0	0	0	0	0	0	0	0	0	0	0	0	0	0	0	0	0	0	0	0	0.000646193	0	0	0	0	0	0	0	7.08E-05
	Proteobacteria_Gammaproteobacteria_Enterobacteriales_Enterobacteriaceae_Raoultella_planticola	0	0	0	0	0	0	0.003737747	0	0	0.004857446	8.56E-05	0	0	0	0	0.000224802	0	0	0	0	0	0	0	0	0	0.007333406	0	0	0	0	0	0	0	0	0	0.000665079	0	0	0	0	0	0	0	0	0	0	0	0
	Proteobacteria_Gammaproteobacteria_Chromatiales_Chromatiaceae_Rheinheimera_aquimaris	0	0	0	0	0	0	0	0	0	0	0	0	0	0	0	0	0	0	0	0	0	0	0	0	0	0	0	0	0	0	0	0	0	0	0	0	0	0	0	0	0	0	0	0	0	0	0	0
	Proteobacteria_Gammaproteobacteria_Chromatiales_Chromatiaceae_Rheinheimera_perlucida	0	0	0	0	0	0	0	0	0	0	0	0	0	0	0	0	0	0	0	0	0	0	0	0	0	0	0	0	0	0	0	0	0	0	0	0	0	0	0	0	0	0	0	0	0	0	0	0
	Proteobacteria_Gammaproteobacteria_Chromatiales_Chromatiaceae_Rheinheimera_sp.	0	0	0	0	0	0	0	0	0	0	0	0	0	0	0	0	0	0	0	0	0	0	0	0	0	0	0	0	0	0	0	0	0	0	0	0	0	0	0	0	0	0	0	0	0	0	0	0
	Proteobacteria_Gammaproteobacteria_Chromatiales_Chromatiaceae_Rheinheimera_tangshanensis	0	0	0	0	0	0	0	0	0	0	0	0	0	0	0	0	0	0	3.29E-05	0	0	0	0	0	0	0	0	0	0	0	0	0	0	0	0	0	0	0	0	0	0	0	0	0	0	0	0	0
	Proteobacteria_Gammaproteobacteria_Pseudomonadales_Pseudomonadaceae_Rhizobacter_dauci	0	0	0	0	0	0	0	0	0	0	0	0	0	0	0	0	0	0	0	0	0	0	0	0	0	0	0	0	0	0	0	0	0	0	0	0	0	0	0	0	0	0	0	0	0	2.73E-05	0	0
	Proteobacteria_Gammaproteobacteria_Pseudomonadales_Pseudomonadaceae_Rhizobacter_fulvus	0	0	0	0	0	0	0	0	0	0	0	0	0	0	0	0	0	0	0	0	0	0	0	0	0	0	0	0	0	0	0	0	0	0	0	0	0	0	0	0	0	0	0	0	0	0	0	0
	Proteobacteria_Alphaproteobacteria_Rhizobiales_Rhizobiaceae_Rhizobium_aggregatum	0	0	0	0	0	0	0.000622958	0	0	0	0	0	0	0	0	0	0	0	0	0	0	0	0	0	0	0	0	0	0	0	0	0	0	0	0	0	0	0	0	0	0	0	0	0	0	5.47E-05	0	0
	Proteobacteria_Alphaproteobacteria_Rhizobiales_Rhizobiaceae_Rhizobium_pusense	0	0	0	0	0	0	0	0	0	0	0	0	0	0	0	0	0	0	0	0	0	0	0	0	0	0	0	0	0	0	0	0	0	0	0	0	0	0	0	0	0	0	0	0	0	0	0	0
	Proteobacteria_Alphaproteobacteria_Rhizobiales_Rhizobiaceae_Rhizobium_rosettiformans	0	0	0	0	0	0	0	0	0	0	0	0	0	0	0	0	0	0	0	0	0	0	0	0	0	0	0	0	0	0	0	0	0	0	0	0	0	0	0	0	0	0	0	0	0	0.000470233	0	0
	Proteobacteria_Alphaproteobacteria_Rhizobiales_Rhizobiaceae_Rhizobium_soli	0	0	0	0	0	0	0	0	0	0	0	0	0	0	0	0	0	0	0	0	0	0	0	0	0	0	0	0	0	0	0	0	0	0	0	0	0	0	0	0	0	0	0	0	0	3.83E-05	0	0
	Proteobacteria_Alphaproteobacteria_Rhizobiales_Rhizobiaceae_Rhizobium_tarimense	0	0	0	0	0	0	0	0	0	0	0	0	0	0	0	0	0	0	0	0	0	0	0	0	0	0	0	0	0	0	0	0	0	0	0	0	0	0	0	0	0	0	0	0	0	9.84E-05	0	0
	Proteobacteria_Gammaproteobacteria_Lysobacteriales_Rhodanobacteraceae_Rhodanobacter_ginsengisoli	0	0	0.000510811	0	0	0	0	0	0	0	0	3.35E-05	0	2.40E-05	0	0.001062699	0	0	0	0	0	0	0	0	0	0	0	0	0	0	0	0	0	0	0	0	0	0	0	0	0	0	0	0	0	0	0	0
	Proteobacteria_Gammaproteobacteria_Lysobacteriales_Rhodanobacteraceae_Rhodanobacter_sp.	0	0	0	0	0	0	0	0	0	0	0	0	0	0	0	0	0	0	0	0	0	0	0	0	0	0	0	0	0	0	0	0	0	0	0	0	0	0	0	0	0	0	0	0	0	0	0	0
	Proteobacteria_Gammaproteobacteria_Lysobacteriales_Rhodanobacteraceae_Rhodanobacter_terrae	0	0	0	0	0	0	0	0	0	0	0	0	0	0	0	0	0	0	0	0	0	0	0	0	0	0	0	0	0	0	0	0	0	0	0	0	0	0	0	0	0	0	0	0	0	0	0	0
	Proteobacteria_Gammaproteobacteria_Lysobacteriales_Rhodanobacteraceae_Rhodanobacter_thiooxydans	0	0	0	0	0	0	0	0	0	0	0	0	0	0	0	0	0	0	0	0	0	0	0	0	0	0	0	0	0	0	0	0	0	0	0	0	0	0	0	0	0	0	0	0	0	0	0	0
	Firmicutes_Clostridia_Clostridiales_Lachnospiraceae_Robinsoniella_peoriensis	0	0	0	0	0	0	0	0	0	9.13E-05	0	0	0	0	0	0	0	0	0	0	0	0	0	0	0	0	0	0	0	0	0	0	0	0	0	0	0	0	0	0	0	0	0	0	0	0	0	0
Cluster2	Firmicutes_Clostridia_Clostridiales_Clostridiaceae_Romboutsia_ilealis	0.000229387	0	0	0	0	0	0.000241555	0	0.000194295	0	0	0	0.000390301	0	0	0.000153274	0	0	0	0.000432018	0.000239421	0	0	0	0	0.001846999	0.000404589	6.24E-05	0	0	0.000322308	0.000155931	0	0.000234031	9.05E-05	0.000139203	0	5.95E-05	0	5.67E-05	0	0	0	6.84E-05	0.000138522	0	0.000278146	0.000102335
	Firmicutes_Clostridia_Clostridiales_Lachnospiraceae_Roseburia_cecicola	0	0	0	0	0	0	0	0	0	0	0	0	0	0.000915118	0	0.000694842	0	0	0	0	0	0	0	0	0	0	0	0	0	0	0	0	0	0	0	0	0	0	0	0	0	0	0	0	0	0	0	0
Cluster3	Firmicutes_Clostridia_Clostridiales_Lachnospiraceae_Roseburia_faecis	0.011212986	0.03004603	0.035227357	0.018384586	0.022956064	0.002206559	0.011581932	0.006318203	0.000916672	0.017315425	0.031960942	0.019495125	0.061493107	0.022518292	0.014452388	0.131110521	0.070831232	0.106371681	0.025012188	0.022242552	0.018888253	0.013378564	0.010213332	0.001248943	0.008549819	0.003239073	0.025138459	0.006356382	0.054677606	0.005422222	0.045596471	0.002891812	0.015870787	0.019018941	0.000334013	0.001608563	0.015133801	0.014311643	0.001226478	0.099332268	0.016297183	0.017728404	0.006001513	0.008119734	0.09417206	0.008710249	0.000689801	0.014319001
	Firmicutes_Clostridia_Clostridiales_Lachnospiraceae_Roseburia_hominis	0	0	0	0	5.03E-05	0	0	0	0	0.000223098	0	0	0.00254941	0.000147857	0	0	0.001032149	0.000202276	0	0.000393898	0	0	0	0	0	0	0	0	0	0	0.001279159	0	0	0	0	0	0	0	0	0	0	0	0	0	0	3.28E-05	0	0
Cluster4	Firmicutes_Clostridia_Clostridiales_Lachnospiraceae_Roseburia_intestinalis	0	0	9.29E-05	0	0.000108876	0	0	0	0	0.000496899	0.000709684	0.001367394	0.003695399	6.79E-05	0	0.005282841	0.002345793	0.007576907	7.67E-05	0.024701241	0.002909488	0.005247243	0	0	0	0	0.001222758	0	0	0	0.001732404	0	0	0	0	0	0	0	0	0.001292385	0	0.000897965	0	0	0	0	0	7.08E-05
Cluster3	Firmicutes_Clostridia_Clostridiales_Lachnospiraceae_Roseburia_inulinivorans	0.000539735	0.001051016	0.002033955	0	0	0.001982795	0.004398846	0.001054429	0.000552993	0.001820275	0.00207872	0.000594398	0.001195815	0.001426625	0.00054827	0.002728276	0.001559953	0.007130215	0.001698156	0.003430728	0.001597876	0.000520913	0.000217562	0.000920938	8.58E-05	0.013211049	0.000557434	0.001311238	0.008864772	0.000914286	0.001067644	0.001403379	0.005962717	0.010468999	9.74E-05	0.001624029	0.005585866	0.002356512	0.000252016	0.004546021	0.000415462	0.000564435	0.000236826	0.001879399	4.62E-05	0.000218713	0.0257229	0.000110207
Cluster0	Firmicutes_Clostridia_Clostridiales_Lachnospiraceae_Roseburia_sp.	0	8.44E-05	0.005962553	0	0.002035142	9.95E-05	0.002949515	0.001313852	0.003427558	0.000400562	0.00014093	0.000711603	0.001611028	0.001882186	0	0.003137006	0	0.003725242	0.001325657	0.002725523	0.001545828	0	0.00037469	0.000769551	0.00584047	0.000655093	0.004135798	0.009790577	0.001112893	0.008736508	0.003414447	0	0.001264045	0.000218429	0	0.01119807	0	0.000505817	0.000100806	0.00082758	4.43E-05	0	0	0.014328138	0.001439093	0.001230261	8.90E-05	0.001849898
	Proteobacteria_Alphaproteobacteria_Rhodobacterales_Rhodobacteraceae_Roseicyclus_mahoneyensis	0	0	0	0	0	0	0	0	0	0	0	0	0	0.000243765	0	0	0	0	0	0	0	0	0	0	0	0	0	0	0	0	0	0	0	0	0	0	0	0	0	0	0	0	0	0	0	0	0	0
	Proteobacteria_Alphaproteobacteria_Rhodobacterales_Rhodobacteraceae_Roseovarius_pacificus	0	0	0	0	0	0	0	0	0	0	0	0	0	0	0	0	0	0	0	0	0	0	0	0	0	0	0	0	0	0	0	0	0	0	0	0	0	0	0	0	0	0	0	0	0	0	0	0
	Actinobacteria_Actinobacteria_Micrococcales_Micrococcaceae_Rothia_aeria	0	0	0	0	0	0	0	0	0	0	0	0	0	0	0	0	0	0	0	0	0	0	0	0	0	0	0	0	0	0	0	0	0	0	0	0	0	0	0	0	0	0	0	0	0	0	0	0
	Actinobacteria_Actinobacteria_Micrococcales_Micrococcaceae_Rothia_dentocariosa	0	0	0	0	0	0	0	0	0	0	0	0	0	0	0	0	0	0	0	0	0	0	0	0	0	0	0	0	0	0	0	0	0	0	0	0	0	0	0	0	0	0	0	0	0	0	0	0
	Actinobacteria_Actinobacteria_Micrococcales_Micrococcaceae_Rothia_mucilaginosa	0	0	0	4.01E-05	0	0	0	0	0	0	6.54E-05	0.000329291	0	0.000219788	0	0	0.000281495	0	0	0	0	0	0.000785641	0	0	0	0	0	0	0	0	0	7.66E-05	0	0	0	0	0	0	0	0	0	6.35E-05	0.01159571	4.62E-05	0.000103889	0	0
	Proteobacteria_Alphaproteobacteria_Rhodobacterales_Rhodobacteraceae_Rubellimicrobium_roseum	0	0	0	0	0	0	0	0	0	0	0	0	0	0	0	0	0	0	0	0	0	0	0	0	0	0	0	0	0	0	0	0	0	0	0	0	0	0	0	0	0	0	0	0	0	0	0	0
	Proteobacteria_Alphaproteobacteria_Rhodospirillales_Acetobacteraceae_Rubritepida_sp.	0	0	0	0	0	0	0	0	0	0	0	0	0	0	0	0	0	0	0	0	0	0	0	0	0	0	0	0	0	0	0	0	0	0	0	0	0	0	0	0	0	0	0	0	0	4.92E-05	0	0
	Unclassified Burkholderiales_____gelatinosus	0	0	0	0	0	0	0	0	0	0	0	0	0	0	0	0	0	0	0	0	0	0	0	0	0	0	0	0	0	0	0	0	0	0	0	0	0	0	0	0	0	0	0	0	0	5.47E-05	0	0
Cluster2	Firmicutes_Clostridia_Clostridiales_Ruminococcaceae_Ruminiclostridium_siraeum	0	0	0	0	0.003098776	0	0.000177988	0	0.000229168	0.000917743	0	0	0.000838731	0	0	0	0	0	0	0	0	0.000139757	0.000797728	6.31E-05	0	0	0	6.24E-05	0	0.000444444	0	0.00038274	0	0.000967329	0.000876784	9.28E-05	0.008313848	0.000595079	0.000168011	0	0	0.001718962	0.001519151	0	0.000146218	0	0	0
Cluster0	Firmicutes_Clostridia_Clostridiales_Ruminococcaceae_Ruminococcus_bromii	0.001032242	0.001868048	0.000287911	4.58E-05	0.019070032	0.002971085	0.003547046	0.003866238	0.004673037	0.003113227	0.005531508	0.000563701	0.001137685	0.001262783	0.000109654	0.001502085	0.004785419	0.024542773	0.001615987	0.00349426	0.007526154	0.001130762	0.000217562	0.012123582	0.002065968	0	5.39E-05	0.010814591	0.005257462	0	0.004300794	0.000751304	0.035035751	0.001170156	0.021926559	0.000340273	0.004871395	0.005605641	0.003024194	0.000113367	0.000736752	0	0.002108328	0.000396863	0.005410064	0.010257644	0	0
Cluster0	Firmicutes_Clostridia_Clostridiales_Ruminococcaceae_Ruminococcus_callidus	0.009121514	0.000180284	0	0.009180831	0.001072009	0	0.002186709	0.000853585	0.003058896	0.001571825	0.006226092	0.000524633	0	0.000947087	0	8.17E-05	0.002251962	0	0.00289782	0.001016512	0.000900432	0	0.019870671	0.000176618	0.00010723	0	0.000458534	0	0	0.000647619	0	0	0.026059755	0.005491934	0	0.003201658	0	8.93E-05	0.011676747	0	0.00011079	0.000153937	0.001103262	0	0.004925236	6.56E-05	0	0
	Firmicutes_Clostridia_Clostridiales_Ruminococcaceae_Ruminococcus_champanellensis	0	0	0	0	0	0	8.90E-05	0	0	3.55E-05	0	0	0	0	0	0	0	0	0	0	0	0.000203283	0	0	0	0	0	0	0	8.89E-05	8.06E-05	0	0	0	0.000612357	0	0	0	0	0	0	0	0.000248378	0	0.001877746	0	0	0
Cluster3	Firmicutes_Clostridia_Clostridiales_Ruminococcaceae_Ruminococcus_faecis	6.07E-05	0.000157269	0.002841964	4.01E-05	7.54E-05	4.35E-05	0.000114421	0	0	0.009045598	0.001927723	0.000119996	0.004434479	0.001450602	0.000614062	0	0	0.002772861	0.003818111	0.000648026	0.001348046	0	0	0	0	0.000618699	0	0	0.000353056	0	0	0	0.000868233	0	7.65E-05	0.000324806	0	0.00067839	0	0.001632486	0	0.003309644	0	0.000269137	0.000515611	0.000240584	0.000111258	0
	Firmicutes_Clostridia_Clostridiales_Ruminococcaceae_Ruminococcus_flavefaciens	0	0.000329881	0	0	0	0	0	0	0	0.000674364	7.55E-05	0	0	0	0	0	0	0	0	0	0	0	0	0	0	0	0	0	0	0	0	0	0.007111849	0	6.96E-05	0	0	0	0.003696237	0	0	0	0	0	0	0	0	0
Cluster4	Firmicutes_Clostridia_Clostridiales_Ruminococcaceae_Ruminococcus_gauvreauii	0	0	0.005396018	0.012206723	0	0	0	0	0	0.007103634	0	0.000329291	0.006211593	0.000951083	0.006074828	0.000286111	0	4.21E-05	0.001824148	0.00285894	0.001280383	0.002134472	0	0	0	0	0.006185715	0	0	0	0.000503606	0	0	0	0	0	0	0	0	0.000136041	0	0.00100059	0	0	0	0.005823236	0	0.00082655
Cluster3	Firmicutes_Clostridia_Clostridiales_Ruminococcaceae_Ruminococcus_gnavus	0.036108244	0.002105869	0.034800134	0.020499272	0.018492153	0.013382313	0.020773739	0.014192944	0.006665803	0.030741851	0.010121804	0.008857361	0.031257266	0.006933316	0.028378438	0.017830867	0.027797652	0.024947324	0.025806487	0.022382323	0.017061365	0.018816385	0.037444854	0.014987321	0.013596786	0.035102085	0.0224412	0.004970216	0.003898965	0.005892063	0.008571371	0.013239964	0.029609295	0.0014978	0.013638862	0.000139203	0.009028319	0.00476658	0.003847446	0.006382569	0.020512735	0.05259512	0.003835423	0.034969597	0.005217672	0.073580552	0.005151256	0.016853756
	Firmicutes_Clostridia_Clostridiales_Ruminococcaceae_Ruminococcus_lactaris	0	0	0	0	0	0	0	0	0	3.04E-05	0	0.000117205	0	0	0	0	0	0	0	0	9.37E-05	0	0	0	0	0	0	0	0.000399107	0	0	0	0	0	0	0	0	0	0	0	0	0	0	0	0.000130827	0	0	0
Cluster3	Firmicutes_Clostridia_Clostridiales_Ruminococcaceae_Ruminococcus_sp.	0	0	0	0	6.70E-05	0.000323214	0	0	0	2.54E-05	2.52E-05	0	0.000182694	0	0	0	0.000375327	0.000151707	0.000109558	0.000603554	0.000296674	0	0	0	0.000221609	0	0	0.002447644	0	0	7.05E-05	0	0.000102145	9.36E-05	4.87E-05	0	0	0	0	7.94E-05	3.88E-05	0	0.000132854	0	0.002755054	4.37E-05	7.79E-05	0
Cluster3	Firmicutes_Clostridia_Clostridiales_Ruminococcaceae_Ruminococcus_torques	0	0	0	0	0.000335003	4.35E-05	0.000216128	0	0	0	2.52E-05	0.000212086	0	0.000183823	0	7.15E-05	0.000574719	0.000943953	0	0.000965686	0.000104096	0	0	0	0.00021446	0	0.000881105	0	0	0	0	0	0	0.000202827	0	0	0	0	0	0.000578172	0	0	0	0	0	0	8.90E-05	0
	Firmicutes_Bacilli_Bacillales_Planococcaceae_Rummeliibacillus_pycnus	0	0	0	0	0	0	0	0	0	0	0	0	0	0	0	0	0	0	0	0	0	0	0	0	0	0	0	0	0	0	0	0	0	0	0	0	0	0	0	0	0	0	0	0	0	0	0	0
	Proteobacteria_Gammaproteobacteria_Oceanospirillales_Halomonadaceae_Salinicola_salarius	0	0	0	0	0	0	0.000699238	0	0	0	0	0	0	0	0	0	0	0	0	0	0	0	0	0	0	0	0	0	0	0	0	0	0	0	0	0	0	0	0	0	0	0	0	0	0	0	0	0
	Proteobacteria_Gammaproteobacteria_Enterobacteriales_Enterobacteriaceae_Salmonella_enterica	0	0	6.50E-05	0	0	0	0	0	0	5.07E-05	0	0	0	0	0	0	0	0	0	0	0	0	0.000725207	0	0	0	0	0	0	0	0	0	0	0	0	0	0	0	0	0	0	0	0	0	0	0	0	0
	Proteobacteria_Gammaproteobacteria_Enterobacteriales_Enterobacteriaceae_Salmonella_subterranea	0	0	0	0	0	0	0	0	0	0	0	0	0	0	0	0	0	0	0	5.08E-05	0	0	0	0	0	0	0	0	0	0	0	0	0	0	0	0	0	0	0	0	0	0	0	0	0	0	0	0
	Firmicutes_Clostridia_Clostridiales_Clostridiaceae_Sarcina_ventriculi	0	0	0	0	0	0	0.000800946	0	0	0.000349858	0	0	0	0	0	0	0	0	2.74E-05	6.35E-05	7.29E-05	0.000609849	0	0	0	0	0	0	0	0	0.000362596	0	0	0.002340313	0	0	0	0	0	0	0	0	0	0.000196151	0	0	0	0
	Actinobacteria_Actinobacteria_Bifidobacteriales_Bifidobacteriaceae_Scardovia_inopinata	0	0	0	0	0	0	0	0	0	0	0	0	0	0	0	0	0	0	0	0	0	0	0	0	0	0	0	0	0	0	0	0	0	0	0	0	0	0	0	0	0	0	0	0	0	0	0	0
	Actinobacteria_Actinobacteria_Bifidobacteriales_Bifidobacteriaceae_Scardovia_wiggsiae	0	0	0	0	0	0	0	0	0	0	0	0	0	0	0	0	0	0	0	0	0	0	0	0	0	0	0	0	0	0	0	0	0	0	0	0	0	0.000297539	0	0	0	0	0	0	0.000246262	0	0.00013351	0
	Firmicutes_Negativicutes_Selenomonadales_Selenomonadaceae_Schwartzia_sp.	0	0	0	0	0	0	0	0	0	0	0	0	0	0	0	0	0	0	0	0	0	0	0	0	0	0	0	0	0	0	0	0	0	0	0	0	0	0	0	0	0	0	0	0	0	0	0	0
	Unclassified Tissierellia_____sp.	0	0	0	0	0	0	0	0	0	0	0	0	0	0	0	0	0	0	0	0	0	0	0	0	0	0	0	0	0	0	0	0	0	0	0	0	0	0	0	0	0	0	0	0	0	0	0	0
	Bacteroidetes_Sphingobacteriia_Sphingobacteriales_Chitinophagaceae_Sediminibacterium_salmoneum	0	0	0	0	0	0	0	0	0	0	0	0	0	0	0	0	0	0	0	0	0	0	0	0	0	0	0	0	0	0	0	0	0	0	0	0	0	0	0	0	0	0	0	0	0	0	0	0
	Firmicutes_Negativicutes_Selenomonadales_Selenomonadaceae_Selenomonas_artemidis	0	0	0	0	0	0	0	0	0	0	0	0	0	0	0	0	0	0	0	0	0	0	0	0	0	0	0	0	0	0	0	0	0	0	0	0	0	0	0	0	0	0	0	0	0	0	0	0
Cluster3	Firmicutes_Negativicutes_Selenomonadales_Selenomonadaceae_Selenomonas_bovis	0.001666431	0.001430763	0.001003046	0.000464199	0	0.000671291	0.00044497	0.000100422	0.00109104	0.000202816	0.00015603	9.77E-05	0.000921774	0.000363649	0	0.003985122	0.000269766	0.000514117	7.67E-05	0	0.000307084	0.000101642	0.017755484	0	5.00E-05	0	0	0	0	0	0.000100721	0.000425267	7.66E-05	0.000343246	0	0.000479475	0	0.000136868	0	0.001768527	0	0.024937784	0	0.00116322	0.000323219	0	0	0
	Firmicutes; Negativicutes_Selenomonadales_Selenomonadaceae_Selenomonas__genomosp.	0	0	0	0	0	0	0	0	0	0	0	0	0	0	0	0	0	0	0	0	0	0	0	0	0	0	0	0	0	0	0	0	0	0	0	0	0	0	0	0	0	0	0	0	0	0	0	0
	Firmicutes_Negativicutes_Selenomonadales_Selenomonadaceae_Selenomonas_infelix	0	0	0	0	0	0	0	0	0	0	0	0	0	0	0	0	0	0	0	0	0	0	0	0	0	0	0	0	0	0	0	0	0	0	0	0	0	0	0	0	0	0	0	0	0	0	0	0
	Firmicutes_Negativicutes_Selenomonadales_Selenomonadaceae_Selenomonas_noxia	0	0	0	0	0	0	0	0	0	4.56E-05	0	0	0	0	0	0	0	0	0	0	0	0	0	0	0	0	0	0	0	0	0	0	0	0	0	0	0	0	0	0	0	0	0	0	0	0	0	0
	Firmicutes_Negativicutes_Selenomonadales_Selenomonadaceae_Selenomonas_sp.	0	0	0	0	0	0	0	0	0	0	0.000392591	0	0	0	0	0	0	0	0	0	0	0	0	0	0	6.37E-05	0	0	0	0	0	0	0	0	0	0	0	0	0	5.67E-05	0	0	0	0	0.000138522	0	0	0
	Firmicutes_Negativicutes_Selenomonadales_Selenomonadaceae_Selenomonas_sputigena	0	0	0	0	0	0	0	0	0	0	0	0	0	0	0	0	0	0	0	0	0	0	0	0	0	0	0	0	0	0	0	0	0	0	0	0	0	0	0	0	0	0	0	0	0	0	0	0
	Actinobacteria_Coriobacteriia_Coriobacteriales_Coriobacteriaceae_Senegalimassilia_anaerobia	0	0	0	4.58E-05	0.000376878	4.97E-05	0	0	0	0	0	0	0	0	0.000153516	0	0	0	0	0	0	0	0	0	3.57E-05	5.46E-05	0	0	0	0	0	0.000467793	0.000727783	0	0.000118296	0	0	0	0	0	0	0	0.000127077	0	4.62E-05	5.47E-05	0	0
	Proteobacteria_Gammaproteobacteria_Enterobacteriales_Enterobacteriaceae_Serratia_liquefaciens	0	0	0	0	0	0	0	0	0	0	0	0	0	0	0	0	0	0	0	0	0	0	0	0	0	0	0	0	0	0	0	0	0	0	0	0	0	0	0	0	0	0	0	0	0	0	0	0
	Proteobacteria_Gammaproteobacteria_Enterobacteriales_Enterobacteriaceae_Serratia_marcescens	0	0	0	0	0	0	0	0	0	0	0	0	0	0	0	0	0	0	0	0	0.000161349	0	0	0	0	0	0	0	0	0	0	0	0	0	0	0	0	0	0	0	0	0	0	0	0	0	0	0
	Proteobacteria_Gammaproteobacteria_Enterobacteriales_Enterobacteriaceae_Serratia_odorifera	0	0	0	0	0	0	0	0	0	0	0	0	0	0	0	0	0	0	0	0	0	0	0	0	0	0	0	0	0	0	0	0	0	0	0	0	0	0	0	0	0	0	0	0	0	0	0	0
	Proteobacteria_Gammaproteobacteria_Enterobacteriales_Enterobacteriaceae_Serratia_quinivorans	0	0	0	0	0	0	0	0	0	0	0	0	0	0	0	0	0	0	0	0	0	0	0	0	0	0	0	0	0	0	0	0	0	0	0	0	0	0	0	0	0	0	0	0	0	0	0	0
	Proteobacteria_Gammaproteobacteria_Enterobacteriales_Enterobacteriaceae_Serratia_rubidaea	0	0	0	0	0	0	0	0	0	0	0	0	0	0	0	0	0	0	0	0	0	0	0	0	0	0	0	0	0	0	0	0	0	0	0	0	0	0	0	0	0	0	0	0	0	0	0	0
	Proteobacteria_Gammaproteobacteria_Enterobacteriales_Enterobacteriaceae_Serratia_ureilytica	0	0	0	0	0	0	0	0	0	0	0	0	0	0	0	0	0	0	0	0	0	0	0	0	0	0	0	0	0	0	0	0	0	0	0	0	0	0	0	0	0	0	0	0	0	0	0	0
	Proteobacteria_Gammaproteobacteria_Alteromonadales_Shewanellaceae_Shewanella_atlantica	0	0	0	0	0	0	0	0	0	0	0	0	0	0	0	0	0	0	0	0	0	0	0	0	0	0	0	0	0	0	0	0	0	0	0	0	0	0	0	0	0	0	0	0	0	0	0	0
	Proteobacteria_Gammaproteobacteria_Alteromonadales_Shewanellaceae_Shewanella_canadensis	0	0	0	0	0	0	0	0	0	0	0	8.65E-05	0	0	0	0	0	0	0	5.72E-05	0	0	0	0	0	0	0	0	0	0	0	0	0	0	0	0	0	0	0	0	0	0	0	0	0	0	0	0
	Proteobacteria_Gammaproteobacteria_Alteromonadales_Shewanellaceae_Shewanella_sp.	0	0	0	0	0	0	0	0	0	0	0	0	0	0	0	0	0	0	0	0	0	0	0	0	0	0	0	0	0	0	0	0	0	0	0	0	0	0	0	0	0	0	0	0	0.001108178	0	0	0
	Proteobacteria_Gammaproteobacteria_Alteromonadales_Shewanellaceae_Shewanella_xiamenensis	0	0	0	0	0	0	0	0	0	0	0	0	0	0	0	0	0	0	0	0	0	0	0	0	0	0	0	0	0	0	0	0	0	0	0	0	0	0	0	0	0	0	0	0	0	0	0	0
	Proteobacteria_Gammaproteobacteria_Enterobacteriales_Enterobacteriaceae_Shigella_boydii	0	0	0.000594398	0	0	0	0	0	0	5.07E-05	0	0	0	0	0	0.000275893	0	0	0	0	0	0	0	0	0	0	0	0	0	0	0	0	0	0	0	0	0	0	0	0	0	0	0	0	0	0	0	0
	Proteobacteria_Gammaproteobacteria_Enterobacteriales_Enterobacteriaceae_Shigella_dysenteriae	0	0	0	0	0	0	0	0	0	0.000202816	0	0	0	7.19E-05	0	0	0	0	0	0	0	0	0	0	0	0	0	0	0	0	0	0	0	0	0	0	0	0	0	0	0	0	0	0	0	0	0	0
	Proteobacteria_Gammaproteobacteria_Enterobacteriales_Enterobacteriaceae_Shigella_flexneri	0	0	0	3.44E-05	0	0	0	0	0	0.000152112	0	6.98E-05	0.000166085	6.79E-05	0	0.000245238	0	0.002309313	0	0	0	0	0	0	0	0	0	0	0	0	0	8.51E-05	0	0	0	0	0	0	0	5.67E-05	0	0	0	0	0	0.000136696	0	0.000212542
	Proteobacteria_Gammaproteobacteria_Enterobacteriales_Enterobacteriaceae_Shigella_sonnei	0	0	0	0	0	0	0	0	0	8.62E-05	0	0	0	0.000203804	0	0	0	0	0	0	0	0	0	0	0	0	0	0	0	0	0	0	0	0	0	0	0	0	0	0	0	0	0	0	0	0	0	6.30E-05
	Proteobacteria_Gammaproteobacteria_Enterobacteriales_Enterobacteriaceae_Shigella_sp.	0	0	0	0	0	0	0	0	0	0.000106478	2.52E-05	0.000206504	0	0	0	0	0	0	0	0	0	0	0	0	0	0	0	0	0	0	0	0	0	0	0	0	0	0	0	0	0	0	0	0	0	3.83E-05	0	0
	Firmicutes_Clostridia_Clostridiales_Lachnospiraceae_Shuttleworthia_satelles	0	0	0	0	0	0	0	0	0	0	0	0	5.81E-05	0	0	0	0	0	0	0	0	0	0	0	0	0	0	0	0	0	0	0	0	0	0	0	0	0	0	0	0	0	0	0	0	0	0	0
	Proteobacteria_Betaproteobacteria_Nitrosomonadales_Gallionellaceae_Sideroxydans_lithotrophicus	0	0	0	0	0	0	0.000216128	0	0	0	0	0	0	0	0	0	0	0	0	0	0	0	0	0	0	0.000154675	0	0	0	0	0	0	0	0	0	0	0	0	0	0	9.42E-05	0	0	0	0	0	0	0
	Proteobacteria_Betaproteobacteria_Neisseriales_Neisseriaceae_Simonsiella_muelleri	0	0	0	0	0	0	0	0	0	0	0	0	0	0	0	0	0	0	0	0	0	0	0	0	0	0	0	0	0	0	0	0	0	0	0	0	0	0	0	0	0	0	0	0	0	0	0	0
	Proteobacteria_Alphaproteobacteria_Rhodospirillales_Rhodospirillaceae_Skermanella_stibiiresistens	0	0	0	0	0	0	0	0	0	0	0	0	0	0	0	0	0	0	0	0	0	0	0	0	0	0	0	0	0	0	0	0	0	0	0	0	0	0	0	0	0	0	0	0	0	0	0	0
	Actinobacteria_Coriobacteriia_Eggerthellales_Eggerthellaceae_Slackia_equolifaciens	0	0	0	0	0	0	0	0	0	0	0	0	0	0	0	0	0	0	0	0	0	0	0	0	0	0	0	0	0	0	0	0	0	0	0	0	0	0	0	0	0	0	0	0	0	0	0	0
	Actinobacteria_Coriobacteriia_Eggerthellales_Eggerthellaceae_Slackia_exigua	0	0	0	0	0	0	0	0	0	0	0	0	0	0	0	0	0	0	0	0	0	0	0	0	0	0	0	0	0	0	0	0	0	0	0	0	0	0	0	0	0	0	0	0	0	0	0	0
Cluster2	Actinobacteria_Coriobacteriia_Eggerthellales_Eggerthellaceae_Slackia_isoflavoniconvertens	0	5.37E-05	0.000436511	7.45E-05	0	0	6.36E-05	0	0	5.07E-05	0	2.79E-05	0	0	0	0	0	0	0	0	0	0	0	0	0.000221609	0.000100084	0	0	0	0	6.04E-05	0.000155931	0.000715015	0	0.000758488	0	0	7.74E-05	0	0	0	0	7.51E-05	0	0.00010774	0.000120292	0	0
	Fusobacteria_Fusobacteriia_Fusobacteriales_Leptotrichiaceae_Sneathia_amnionii	0	0	0	0	0	0	0	0	0	0	0	0	0	0	0	0	0	0	0	0	0	0	0	0	0	0	0	0	0	0	0	0	0	0	0	0	0	0	0	0	0	0	0	0	0	0	0	0
	Fusobacteria_Fusobacteriia_Fusobacteriales_Leptotrichiaceae_Sneathia_sanguinegens	0	0	0	0	0	0	0	0	0	0	0	0	0	0	0	0	0	0	0	0	0	0	0	0	0	0	0	0	0	0	0	0	0	0	0	0	0	0	0	0	0	0	0	0	0	0	0	0
	Proteobacteria_Alphaproteobacteria_Sneathiellales_Sneathiellaceae_Sneathiella_glossodoripedis	0	0	0	0	0	0	0	0	0	0	0	0.000119996	0	0	0	0	0	0	0	0	0	0	0	0	0	0	0	0	0	0	0	0	0	0	0	0	0	0	0	0	0	0	0	0	0.000146218	0	0	0
	Firmicutes_Bacilli_Bacillales_Planococcaceae_Solibacillus_silvestris	0	0	0	0	0	0	0	0	0	0	0	0	0	0	0	0	0	0	0	0	0	0	0	0	0	0	0	0	0	0	0	0	0	0	0	0	0	0	0	0	0	0	0	0	0	0	0	0
	Firmicutes_Erysipelotrichia_Erysipelotrichales_Erysipelotrichaceae_Solobacterium_moorei	0	3.45E-05	0	0	0	0	0	0	4.48E-05	0	0	0	0	0	0	0	0	0	0.000104081	0	0	0	0	0	0	0	0	0	0	0	0	0	0	0	0	0	0	0	0	0	0	0	0	0	0	0	0	3.94E-05
	Unclassified Burkholderiales_____natans	0	0	0	0	0	0	0	0	0	0	0	0	0	0	0	0	0	0	0	0	0	0	0	0	0	0	0	0	0	0	0	0	0	0	0	0	0	0	0	0	0	0	0	0	0	0	0	0
	Proteobacteria_Alphaproteobacteria_Sphingomonadales_Sphingomonadaceae_Sphingomonas_aestuarii	0	0	0	0	0	0	0	0	0	0	0	0	0	0	0	0	0	0	0	0	0	0	0	0	0	0	0	0	0	0	0	0	0	0	0	0	0	0	0	0	0	0	0	0	0	0	0	0
	Proteobacteria_Alphaproteobacteria_Sphingomonadales_Sphingomonadaceae_Sphingomonas_cynarae	0	0	0	0	0	0	0	0	0	0	0	0	0	0	0	0	0	0	0	0	0	0	0	0	0	0	0	0	0	0	0	0	0	0	0	0	0	0	0	0	0	0	0	0	0	0	0	0
	Proteobacteria_Alphaproteobacteria_Sphingomonadales_Sphingomonadaceae_Sphingomonas_kaistensis	0	0	0	0	0	0	0	0	0	0	0	5.58E-05	0	0	0	0	0	0	0	0	0	0	0	0	0	0	0	0	0	0	0	0	0	0	0	0	0	0	0	0	0	0	0	0	0	0	0	0
	Proteobacteria_Alphaproteobacteria_Sphingomonadales_Sphingomonadaceae_Sphingomonas_koreensis	0	0	0	0	0	0	0	0	0	0	0	0	0	0	0	0	0	0	0	0	0	0	0	0	0	0	0	0	0	0	0	0	0	0	0	0	0	0	0	0	0	0	0	0	0	0	0	0
	Proteobacteria_Alphaproteobacteria_Sphingomonadales_Sphingomonadaceae_Sphingomonas_sediminicola	0	0	0	0	0	0	0	0	0	0	0	0	0	0	0	0	0	0	0	0	0	0	0	0	0	0	0	0	0	0	0	0	0	0	0	0	0	0	0	0	0	0	0	0	0	0	0	0
	Proteobacteria_Alphaproteobacteria_Sphingomonadales_Sphingomonadaceae_Sphingomonas_sp.	0	5.75E-05	0	0	0	0	0.000203415	0	0	0	0	0	0	0	0	0	0	0	0	0	0	0	0	0	0	0	0	0	0	0	0	0	0	0	0	0	0	0	0	0	0	0	0	0	0	0	0	0
	Proteobacteria_Alphaproteobacteria_Sphingomonadales_Sphingomonadaceae_Sphingomonas_yabuuchiae	0	0	0	0	0	0	0	0	0	0	0	0	0	0	0	0	0	0	0	0	0	0	0	0	0	0	0	0	0	0	0	0	0	0	0	0	0	0	0	0	0	0	0	0	0	0	0	0
	Firmicutes_Clostridia_Clostridiales_Lachnospiraceae_Sporobacterium_sp.	0	0	0	0	0	0	0	0	0.000836962	6.59E-05	0	0.000122786	0	0	0	0	0.000668551	0	0.000558748	0	0	0	0	0	0	0	0	0	0	0	0	0	0	0	0	0	0	3.57E-05	0	0	0	0	0	0	0	0	0	0
	Firmicutes_Bacilli_Bacillales_Staphylococcaceae_Staphylococcus_arlettae	0	0	0	0	0	0	0	0	0	0	0	0	0	0	0	0	0	0	0	0	0	0	0	0	0	0	0	0	0	0	0	0	0	0	0	0	0	0	0	0	0	0	0	0	0	0	0	0
	Firmicutes_Bacilli_Bacillales_Staphylococcaceae_Staphylococcus_aureus	0	0	0	0	0	0	0	0	0	0	0	0	0	0	0	0	0	0	0	0	0	0	0	0	0	0	0	0	0	0	0	0	0	0	0	0	0	0	0	0	0	0	0	0	0	0	0	0
	Firmicutes_Bacilli_Bacillales_Staphylococcaceae_Staphylococcus_auricularis	0	0	0	0	0	0	0	0	0	0	0	0	0	0	0	0	0	0	0	0	0	0	0	0	0	0	0	0	0	0	0	0	0	0	0	0	0	0	0	0	0	0	0	0	0	0	0	0
	Firmicutes_Bacilli_Bacillales_Staphylococcaceae_Staphylococcus_chromogenes	0	0	0	0	0	0	0	0	0	0	0	0	0	0	0	0	0	0	0	0	0	0	0	0	0	0	0	0	0	0	0	0	0	0	0	0	0	0	0	0	0	0	0	0	0	0	0	0
	Firmicutes_Bacilli_Bacillales_Staphylococcaceae_Staphylococcus_epidermidis	0	0	0	0	0	0	0	0	0	0	0	0	0.000274041	0	0	0	0	0	0	0	0	0	0	0	0	0	0	0	0	0	0	0	0	0	0	0	0	0	0	0	0	0	0	0	0	0	0	0
	Firmicutes_Bacilli_Bacillales_Staphylococcaceae_Staphylococcus_massiliensis	0	0	0	0	0	0	0	0	0	0	0	0	0	0	0	0	0	0	0	0	0	0	0	0	0	0	0	0	0	0	0	0	0	0	0	0	0	0	0	0	0	0	0	0	0	0	0	0
	Proteobacteria_Gammaproteobacteria_Lysobacteriales_Lysobacteraceae_Stenotrophomonas_acidaminiphila	0	0	0	0	0	0	0	0	0	0	0	0	0	0	0	0	0	0	0	0	0	0	0	0	0	0	0	0	0	0	0	0	0	0	0	0	0	0	0	0	0	0	0	0	0	0	0	0
	Proteobacteria_Gammaproteobacteria_Lysobacteriales_Lysobacteraceae_Stenotrophomonas_koreensis	0	0	0	0	0	0	0	0	0	0	0	0	0	0	0	0	0	0	0	0	0	0	0	0	0	0	0	0	0	0	0	0	0	0	0	0	0	0	0	0	0	0	0	0	0	0	0	0
	Proteobacteria_Gammaproteobacteria_Lysobacteriales_Lysobacteraceae_Stenotrophomonas_sp.	0	0	0	0	0	0	0	0	0	0	0	0	0	0	0	0	0	0	0	0	0	0	0	0	0	0	0	0	0	0	0	0	0	0	0	0	0	0	0	0	0	0	0	3.65E-05	0	0	0	0
	Proteobacteria_Betaproteobacteria_Rhodocyclales_Rhodocyclaceae_Sterolibacterium_sp.	0	0	0	0	0	0	6.36E-05	0	0	0	0	0	0	0	0	0	0	0	0	0	0	0	0	0	0	0.000263857	0	0	0	0	0	0	0	0	0	0	0	4.76E-05	0	0	0	0	0	0	0	0	0	0
	Firmicutes_Clostridia_Clostridiales_Lachnospiraceae_Stomatobaculum_longum	0	0	0	0	0	0	0	0	0	0	0.000458023	0	0	0	0	0	0	0	0	0	0	0	0	0	0	0	0	0	0	0	0.000443173	0	0	0	0	0	0	0	0	0	0	0	0	0	0	0	0	0.000259773
	Firmicutes_Bacilli_Lactobacillales_Streptococcaceae_Streptococcus_alactolyticus	0	0	0	0	0	0	0	0	0	0	0	0	0	0	0	0	0	0	0	0	0	0	0	0	0	0	0.001447529	0	0	0	0	0	0	0	0	0	0	0	0	0	0	0	0	0	0	0	0	0
	Firmicutes_Bacilli_Lactobacillales_Streptococcaceae_Streptococcus_anginosus	0	0	0	0	0	0	0	0	0	0	0	0	0	0	0	0	0	0	3.29E-05	0	0	0	0	0	0	0	0	0	0	0	0	0	0	0	0	0	0	0	0	0.000782233	0	0	0	0	0	0	0	0
	Firmicutes_Bacilli_Lactobacillales_Streptococcaceae_Streptococcus_dysgalactiae	0	0	0	0	0	0	0	0	0	0	0	0	0	0	0	0	0	0	0	0	0	0	0	0	0	0	0	0	0	0	0	0	0	0	0	0	0	0	0	0	0	0	0	0	0	0	0	0
	Firmicutes_Bacilli_Lactobacillales_Streptococcaceae_Streptococcus_hongkongensis	0	0	0	0	0	0	0	0	0	0	0	0	0	0	0	0	0	0	0	0	0	0.000177873	0	0	0	0	9.89E-05	0	0	0	0	0	0	0	0	0	0	0	0	0	0	0	0	0	0	0	0	0
	Firmicutes_Bacilli_Lactobacillales_Streptococcaceae_Streptococcus_infantarius	0	0	0	0	0	0	0	0	0	0	0	0	0	0	0	0	0	0	0	0	0	0	0	0	0	0	0	0	0	0	0	0	0	0	0	0	0	0	0	0	0	0	0	0	0	0	0	0
	Firmicutes_Bacilli_Lactobacillales_Streptococcaceae_Streptococcus_infantis	0	0	0	0	0	0	0	0	0	0	0	0	0	0	0	0	0	0	0	0	0	0	0	0	0	0	0	0	0	0	0	0	0	0	0	0	0	0	0	0	0	0	0	0	0	0	0	0
	Firmicutes_Bacilli_Lactobacillales_Streptococcaceae_Streptococcus_intermedius	0	0	0	0	0	0	0	0	0	0	3.02E-05	0	0	0	0	0	0	0	0	0	0	0	0	0	0	0	0	0	0	0	0	0	0	0	0	0	0	0	0	0	0	0	0	0	0	0	0	0
	Firmicutes_Bacilli_Lactobacillales_Streptococcaceae_Streptococcus_lactarius	0	0	0	0	0	0	0	0	0	0	0	0	0	0	0	0	0	0	0	0	2.60E-05	0	0	0	0	0	0	0	0	0	0	0	0	0	0	0	0	0	0	0	0	0	0	0	0	0	0	0
	Firmicutes_Bacilli_Lactobacillales_Streptococcaceae_Streptococcus_luteciae	0	0	0	0	0	0	0	0	0	0	0	0	0	0	0	0	0	4.21E-05	0	0	0	0	0	0	0	0	0	0	0	0	0	0	0	0	0	0	0	0	0	0	0	0	0	0	0	0	0	0
	Firmicutes_Bacilli_Lactobacillales_Streptococcaceae_Streptococcus_macedonicus	0	0	0	0	0	0	0	0	0	0	0	0	0	0	0	0	0	0	0	0	0	0	0	0	0	0	0	0	0	0	0	0	0	0	0	0	0	0	0	0	0	0	0	0	0	0	0	0
	Firmicutes_Bacilli_Lactobacillales_Streptococcaceae_Streptococcus_mutans	0	0	0	0	0	0	0	0	0	0	0	0	0	0	0	0	0	0	0	0	0	0	0	0	0	0	0	0	0	0	0	0	0	0	0	0	0	0	0	0	0	0	0	0	0	0	0	0
	Firmicutes_Bacilli_Lactobacillales_Streptococcaceae_Streptococcus_parasanguinis	0	0	0	0	0	0	0	0	0	0	0	0	0	0	0	0	0	0	0	0	0	0	0	0	0	0	0	0	0	0	0	0	0	0	0	0	0	0	0	0	0	0	0	0	0	0	0	0
	Firmicutes_Bacilli_Lactobacillales_Streptococcaceae_Streptococcus_parauberis	0	0	0	0	0	0	0	0	0	0	0	0	0	0	0	0	0	0	0	0	0	0	0	0	0	0	0	0	0	0	0	0	0	0	0	0	0	0	0	0	0	0	0	0	0	0	0	0
	Firmicutes_Bacilli_Lactobacillales_Streptococcaceae_Streptococcus_peroris	0	0	0	0	0	0	0	0	0	0	0	0	0	0	0	0	0	0	0	0	0	0	0	0	0	0	0	0	0	0	0	0	0	0	0	0	0	0	0	0	0	0	0	0	0	0	0	0
	Firmicutes_Bacilli_Lactobacillales_Streptococcaceae_Streptococcus_pleomorphus	0	0	0	0	0	0	0	0	0	0	0	0	0	0	0	0	0	0	0	0	0	0	0	0	0	0	0	0	0	0	0	0	0	0	0	0	0	0.000440358	0	0	0	0	0	0	0	0	0	0
	Firmicutes_Bacilli_Lactobacillales_Streptococcaceae_Streptococcus_pseudoporcinus	0	0	0	0	0	0	0	0	0	0	0	0	0	0	0	0	0	0	0	0	0	0	0	0	0	0	0	0	0	0	0	0	0	0	0	0	0	0	0	0	0	0	0	0	0	0	0	0
	Firmicutes_Bacilli_Lactobacillales_Streptococcaceae_Streptococcus_salivarius	0	0	0.000157887	0	0	0	0	0	0	0.000826476	0.000905979	3.63E-05	0	0	0.002215009	0	0.000656822	0	0.000339631	0.000349426	6.77E-05	0	0	0	0	0	0.000899087	0	0	0	0.001400024	0	0	0	0	0	0	0	0	0.000453468	0	0	0	0	0	0.00372359	0	0
	Firmicutes_Bacilli_Lactobacillales_Streptococcaceae_Streptococcus_sanguinis	0	0	0	0	0	0	0	0	0	0	7.55E-05	0	0	0	0	0	0	0	0	0	0	0	0	0	0	0	0	0	0	0	0	0	0	0	0	0	0	0	0	0	0	0	0	0	0	0	0	0
	Firmicutes_Bacilli_Lactobacillales_Streptococcaceae_Streptococcus_sinensis	0	0	0	0	0	0	0	0	0	0	5.54E-05	0	0	0	0	0	0	0	0.000279374	0.00017789	0	0	0	0	0	0	0	0	0	0	0	0	0	0	0	0	0	0	0	0	0	0	0	0	0	0	0	0
	Firmicutes_Bacilli_Lactobacillales_Streptococcaceae_Streptococcus_sobrinus	0	0	0	0	0	0	0	0	0	0	0	0	0	0	0	0	0	0	0	0	0	0	0	0	0	0	0	0	0	0	0	0	0	0	0	0	0	0	0	0	0	0	0	0	0	0	0	0
	Firmicutes_Bacilli_Lactobacillales_Streptococcaceae_Streptococcus_sp.	0	0	0	0	0	0	0	0	0	0	0	0	0	0	0	0	0	0	0	0	0	0	0	0	0	0	0	0	0	0	0	0	0	0	0	0	0	0	0	0	0	0	0	0	0	0	0	0
	Firmicutes_Bacilli_Lactobacillales_Streptococcaceae_Streptococcus_thermophilus	0	0	0.001151646	0	0	0.000105666	0	0	0	0	0	0.000728346	0	0	0	0	0	0	0.000246506	0.000171536	4.68E-05	0	0	0	0	0	0.000395598	0	0	0	0	0	0	0	0	0	0	0	0	0	0	0	0	0	0	2.73E-05	0	0
	Firmicutes_Bacilli_Lactobacillales_Streptococcaceae_Streptococcus_urinalis	0	0	0	0	0	0	0	0	0	0	0	0	0	0	0	0	0	0	0	0	0	0	0	0	0	0	0	0	0	0	0	0	0	0	0	0	0	0	0	0.000204061	0	0	0	0	0	0	0	0
	Firmicutes_Bacilli_Lactobacillales_Streptococcaceae_Streptococcus_vestibularis	0	0	0	0	0	0	0	0	0	0	0	0	0	0	0	0	0	0	0	0	0	0	0	0	0	0	4.50E-05	0	0	0	0.000100721	0	0	0	0	0	0	0	0	0	0	0	0	0	0	0	0	0
	Firmicutes_Clostridia_Clostridiales_Ruminococcaceae_Subdoligranulum_sp.	0	0	0	0	0	0	6.36E-05	0	0	0	0	0.000125577	0	0	0	0	0	0	0	0	0	0	0	0	0	0	0	0	0	0	0	7.09E-05	0	0	0	0	0	9.52E-05	0	0	0	0.000205249	4.62E-05	0	0	0	0	0
	Firmicutes_Clostridia_Clostridiales_Ruminococcaceae_Subdoligranulum_variabile	0	0	0	0	0	0	0	0	0	0	0	0	0	0	0	0	0	0	0	0	0	0	0	0	0	0	0	0	0	0	0.000201442	0	0	0	0	0	0	0	0	0	0	0	0	0	0	0	0	0
	Proteobacteria_Gammaproteobacteria_Aeromonadales_Succinivibrionaceae_Succinatimonas_hippei	0	0	0	0	0	0	0	0	0	0	0	0	0	0	0	0	0	0	0	0	0	0	0	0	0	0	0	0	0	0	0	0	0	0	0	0	0	0	0	0	0	0	0	0	0	0	0	0
	Proteobacteria_Gammaproteobacteria_Aeromonadales_Succinivibrionaceae_Succinivibrio_dextrinosolvens	3.37E-05	0	0	0	0	0	0	0	0	0	0	0	0	4.00E-05	0	0	0	0	0	0	0	0	0	0	0	0	0	0.001436118	0	0	0	0	0	0	0	0	0	0	0	0	0	0	0	0	0	0	0	0
	Proteobacteria_Epsilonproteobacteria_Campylobacterales_Helicobacteraceae_Sulfurimonas_gotlandica	0	0	0	0	0	0	0	0.000786637	0	0	0	0.000228829	0	0	0	0	0	0	0	0	0	0	0	0	0	0	0	0	0	0	0	0	0	0	0	0	0	0	0	0	0	0	0	0	0	0	0	0
	Proteobacteria_Betaproteobacteria_Burkholderiales_Sutterellaceae_Sutterella_parvirubra	0	0	0	0	0	0	0	0	0	0	0	0	0	0	0	0	0	0	0	0	0	0	0	0	0	0	0	0	0	0	0	0	0	0	0	0	0	0	0	0	0	0	0	0	0	0	0	0
Cluster2	Proteobacteria_Betaproteobacteria_Burkholderiales_Sutterellaceae_Sutterella_sp.	0.010214477	0.10403529	0.005591054	0.017811501	0.000159126	0	0.001423904	0.002159068	8.97E-05	0.003072664	0.000508355	0.00079253	0.019872114	0.001378671	0	0.001839287	0	0.000126422	0.000536836	0.011588236	0.001400094	0.000533618	0.001317459	8.83E-05	0.001551263	0.029715762	0.001132849	0.004458209	0.001726904	0.02	0.000604327	0.003713994	0.008720633	0.008269105	0.000744571	0.007687073	0.00032476	0.005159332	0.005208333	0.001473773	0	0.006388383	0.00419355	0	0.002962838	0.000366344	0.001613244	0
Cluster3	Proteobacteria_Betaproteobacteria_Burkholderiales_Sutterellaceae_Sutterella_stercoricanis	0.006227188	0.004188723	0.001606732	0.000647587	0	0	0.004767535	0.001096271	0.017750565	0.000973517	0.000996577	0.000795321	0.007581797	0.000739287	0	0.012221041	0.001149439	0	0.00416322	0.000120711	0.000458023	0.002871373	0	0.000151387	0.004946885	0	0.002850104	0	0.002663269	0.003695238	0.000765481	0.001176571	0.000217058	0.001856648	0.00054973	0.011491942	0.00370226	0.013877235	0.007694892	0.018716911	0	0.011647895	0.001392074	0.001523591	0.001054308	0.00083111	0.13969582	0.000346364
Cluster0	Proteobacteria_Betaproteobacteria_Burkholderiales_Sutterellaceae_Sutterella_wadsworthensis	0.013689018	0.00735328	0.004792332	0.000149002	0.013869114	0.000279705	0.004106437	0.046612439	0.003880912	0.002976326	0.001978055	0.006996032	0.011617671	0.0047714	0.000109654	0.001338592	0.049144372	0.000918668	0.003730464	0.01078138	0.002154791	0.007025969	0.01694567	0.011278338	0.003202608	0.005377225	0.038139251	0.00896637	0.02772256	0.000165079	0.030860965	0.01302733	0.001174668	0.006147221	0.000313137	0.013672781	0.004611587	0.013032224	0.015961022	0.029838225	0	0.00654232	0	0.001391303	0.001816181	0.000415555	0.001034701	0.00016531
	Synergistetes_Synergistia_Synergistales_Synergistaceae_Synergistes_sp.	0	0	0	0	0	0	0	0	0	0	0	0	0	0	0	0	0	0	0	0	0	0	0	0	0	0	0	0	0	0	0	0	0	0	0	0	0	0	0	0	0	0	0	0	0	0	0.000155762	0
	Firmicutes_Clostridia_Clostridiales_Lachnospiraceae_Syntrophococcus_sucromutans	0	0	0	0	0	0	0	0	0	0	0	0	0	0	0	0	0	0	0	0	0	0	0	0	0	0	0	0	0	0	0	0	0	0	0	0	0	0	0	0	0	0	0	0	0	0	0	0
	Bacteroidetes_Bacteroidia_Bacteroidales_Porphyromonadaceae_Tannerella_forsythia	0	0	0	0	0	0	0	0	0	0	0	0	0	0	0	0	0	0	0	0	0	0	0	0	0	0	0	0	0	0	0	0	0	0	0	0	0	0	0	0	0	0	0	0	0	0	0	0
	Bacteroidetes_Bacteroidia_Bacteroidales_Porphyromonadaceae_Tannerella_sp.	0	0	0	0	0	0	0	0	0	0	0	0	0	0	0	0	0	0	0	0	0	0	0	0	0	0	0	0	0	0	0	0	0	0	0	0	0	0	0	0	0	0	0	0	0	0	0	0
	Bacteroidetes_Flavobacteriia_Flavobacteriales_Flavobacteriaceae_Tenacibaculum_sp.	0	0	0	0	0	0	0	0	0	0	0	0	0	0	0	0	0	0	0	0	0	0	0	0	0	0	0	0	0	0	0	0	0	0	0	0	0	0	0	0	0	0	0	0	0	0	0	0
	Proteobacteria_Alphaproteobacteria_Rhizobiales_Methylocystaceae_Terasakiella_pusilla	0	0	0	0	0	0	0	0	0	0	0	0	0	0	0	0	0	0	0	0	0	0	0	0	0	0	0	0	0	0	0	0	0	0	0	0	0	0	0	0	0	0	0	0	0	0	0	0
	Proteobacteria_Alphaproteobacteria_Rhodobacterales_Rhodobacteraceae_Thalassobius_aestuarii	0	0	0	0	0	0	0	0	0	0	0	0	0	0	0	0	0	0	0	0	0	0	0	0	0	0	0	0	0	0	0	0	0	0	0	0	0	0	0	0	0	0	0	0	0	0	0	0
	Proteobacteria_Alphaproteobacteria_Rhodospirillales_Rhodospirillaceae_Thalassospira_sp.	0	0	0	0	0	0	0	0	0	0	0	0	0	0	0	0	0	0	0	0	0	0	0	0	0	0	0	0	0	0	0	0	0	0	0	0	0	0	0	0	0	0	0	0	0	0	0	0
	Proteobacteria_Betaproteobacteria_Rhodocyclales_Rhodocyclaceae_Thauera_terpenica	0	0	0	0	0	0	0	0	0	0	0	0	0	0	0	0	0	0	0	0	0	0	0	0	0	0	0	0	0	0	0	0	0	0	0	0	0	0	0	0	0	0	0	0	0	0	0	0
	Proteobacteria_Gammaproteobacteria_Lysobacteriales_Lysobacteraceae_Thermomonas_brevis	0	0	0	0	0	0	0	0	0	0	0	0	0	0	0	0	0	0	0	0	0	0	0	0	0	0	0	0	0	0	0	0	0	0	0	0	0	0	0	0	0	0	0	0	0	7.11E-05	0	0
	Proteobacteria_Gammaproteobacteria_Lysobacteriales_Lysobacteraceae_Thermomonas_fusca	0	0	0	0	0	0	0	0	0	0	0	0	0	0	0	0	0	0	0	0	0	0	0	0	0	0	0	0	0	0	0	0	0	0	0	0	0	0	0	0	0	0	0	0	0	0	0	0
	Proteobacteria_Gammaproteobacteria_Lysobacteriales_Lysobacteraceae_Thermomonas_hydrothermalis	0	0	0	0	0	0	0	0	0	0	0	0	0	0	0	0	0	0	0	0	0	0	0	0	0	0	0	0	0	0	0	0	0	0	0	0	0	0	0	0	0	0	0	0	0	0	0	0
	Deinococcus-Thermus_Deinococci_Thermales_Thermaceae_Thermus_scotoductus	0	0	0	0	0	0	0	0	0	0	0	0	0	0	0	0	0	0	0	0	0	0	0	0	0	0	0	0	0	0	0	0	0	0	0	0	0	0	0	0	0	0	0	0	0	0	0	0
	Deinococcus-Thermus_Deinococci_Thermales_Thermaceae_Thermus_thermophilus	0	0	0	0	0	0	0	0	0	0	0	0	0	0	0	0	0	0	0	0	0	0	0	0	0	0	0	0	0	0	0	0	0	0	0	0	0	0	0	0	0	0	0	0	0	0	0	0
	Proteobacteria_Gammaproteobacteria_Chromatiales_Ectothiorhodospiraceae_Thioalkalivibrio_nitratireducens	0	0	0	0	0	0	0	0	0	0	0	0	0	0	0	0	0	0	0	0	0	0	0	0	0	0	0	0	0	0	0	0	0	0	0	0	0	0	0	0	0	0	0	0	0	0	0	0
	Proteobacteria_Betaproteobacteria_Hydrogenophilales_Hydrogenophilaceae_Thiobacillus_plumbophilus	0	0	0	0	0	0	0	0	0	0	0	0	0	0	0	0	0	0	0	0	0	0	0	0	0	0	0	0	0	0	0	0	0	0	0	0	0	0	0	0	0	0	0	0	0	0	0	0
	Proteobacteria_Betaproteobacteria_Hydrogenophilales_Hydrogenophilaceae_Thiobacillus_thioparus	0	0	0	0	0	0	0	0	0	0	0	0	0	0	0	0	0	0	0	0	0	0	0	0	0	0	0	0	0	0	0	0	0	0	0	0	0	0	0	0	0	0	0	0	0	0	0	0
	Proteobacteria_Gammaproteobacteria_Chromatiales_Halothiobacillaceae_Thiovirga_sulfuroxydans	0	0	0	0	0.000108876	0	0	0	0	0	0	0	0	0	0	0	0	0	0	0	0	0	0	0	0	0	0	0	0	0	0	0	0	0	0	0	0	0	0	0	0	0	0	0	0	0	0	0
	Firmicutes_Tissierellia_Tissierellales_Tissierellaceae_Tissierella_praeacuta	0	0	0	0	0	0	0	0	0	0	0	0	0	0	0	0	0	0	0	0	0	0	0	0	0	0	0	0	0	0	0	0	0	0	0	0	0	0	0	0	0	0	0	0	0	0	0	0
	Firmicutes_Tissierellia_Tissierellales_Tissierellaceae_Tissierella_sp.	0	0	0	0	0	0	0	0	0	0	0	0	0	0	0	0	0	0	0	0	0	0	0	0	0	0	0	0	0	0	0	0	0	0	0	0	0	0	0	0	0	0	0	0	0	0	0	0
	Proteobacteria_Gammaproteobacteria_Enterobacteriales_Enterobacteriaceae_Trabulsiella_farmeri	0	0	0	0	0	0	0	0	0	0	0	0	0	0	0	0	0	0	0	0	0	0	0	0	0	0	0	0	0	0	0	0	0	0	0	0	0	0	0	0	0	0	0	0	0	0	0	0
	Proteobacteria_Gammaproteobacteria_Enterobacteriales_Enterobacteriaceae_Trabulsiella_odontotermitis	0	0	0	0	4.19E-05	0	0	0	0	0.00012676	0	0.000117205	0.000224215	0	0	0	0	0	0	6.99E-05	0.000119711	0	0	0	0	0	0	0	0	0	0	0	0	0	0	0	0	0	0	0	0	0.000128281	0	0	0	0	0	0.00020467
	Spirochaetes_Spirochaetes_Spirochaetales_Spirochaetaceae_Treponema_berlinense	0	0	0	0	0	0	0	0	0	0	0	0	0	0	0	0	0	0	0	0	0	0	0	0	0	0	0	0	0	0	0	0	0	0	0	0	0	0	0	0	0	0	0	0	0	0	0	0
	Spirochaetes_Spirochaetes_Spirochaetales_Spirochaetaceae_Treponema_lecithinolyticum	0	0	0	0	0	0	0	0	0	0	0	0	0	0	0	0	0	0	0	0	0	0	0	0	0	0	0	0	0	0	0	0	0	0	0	0	0	0	0	0	0	0	0	0	0	0	0	0
	Spirochaetes_Spirochaetes_Spirochaetales_Spirochaetaceae_Treponema_sp.	0	0	0	0	0	0	0	0	0	0	0	0	0	0	0	0	0	0	0	0	0	0	0	0	0	0	0	0	0	0	0	0	0	0	0	0	0	0	0	0	0	0	0	0	0	0	0	0
Cluster1	Spirochaetes_Spirochaetes_Spirochaetales_Spirochaetaceae_Treponema_succinifaciens	0.006760176	0.001442271	0.00073371	0	0	0	0.002326557	0.000133896	0	0.002357737	0.002380713	0.00083718	0.004791563	0.001790274	0.002346594	6.13E-05	0	0.000952381	0.000569704	3.81E-05	0.00096289	0.000177873	0	0	0	0	0.005960944	0.023327547	0.003315655	0.000228571	0.000694976	0	0.031167007	0.002699161	0.020291287	0.002923253	0.005910626	0.004659466	0.000117608	0	0	0	0	0.000976193	0.000615655	0	0	4.72E-05
	Actinobacteria_Actinomycetales_Corynebacterineae_Corynebacteriaceae_Turicella_otitidis	0	0	0	0	0	0	0	0	0	0	0	0	0	0	0	0	0	0	0	0	0	0	0	0	0	0	0	0	0	0	0	0	0	0	0	0	0	0	0	0	4.43E-05	0	0	0	0	0	0	0
	Firmicutes_Erysipelotrichia_Erysipelotrichales_Erysipelotrichaceae_Turicibacter_sanguinis	4.72E-05	0.000161105	0	0	0	0	0.001576465	0.000142264	0.00070245	0.00024845	0	0.00037394	0.001054642	0	0.000592131	0.000347421	0.002744578	0	0.000766909	0.000406605	0.000322698	0	0	0	0	0.000837064	0	6.24E-05	0.000644711	0.000406349	7.05E-05	0.005315831	0	0.000312042	0.000194841	0.000541343	0	0.00401083	0.000436828	0.000283418	0	0.00033353	0	0	0	0	0.009968736	0.000511674
	Proteobacteria_Betaproteobacteria_Burkholderiales_Oxalobacteraceae_Undibacterium_pigrum	0	0	0	0	0	0	0	0	0	0	0	0	0	0	0	0	0	0	0	0	0	0	0	0	0	0	0	0	0	0	0	0	0	0	0	0	0	0	0	0	0	0	0	0	0	0	0	0
	Proteobacteria_Betaproteobacteria_Burkholderiales_Oxalobacteraceae_Undibacterium_terreum	0	0	0	0	0	0	0	0	0	0	0	0	0	0	0	0	0	0	0	0	0	0	0	0	0	0	0	0	0	0	0	0	0	0	0	0	0	0	0	0	0	0	0	0	0	0	0	0
	Proteobacteria_Betaproteobacteria_Neisseriales_Neisseriaceae_Uruburuella_suis	0	0	0	0	0	0	0	0	0	0	0	0	0	0	0	0	0	0	0	0	0	0	0	0	0	0	0	0	0	0	0	0	0	0	0	0	0	0	0	0	0	0	0	0	0	0	0	0
	Firmicutes_Bacilli_Lactobacillales_Enterococcaceae_Vagococcus_penaei	0	0	0	0	0	0	0	0	0	0	0	0	0	0	0	0	0	0	0	0	0	0	0	0	0	0	0	0	0	0	0	0	0	0	0	0	0	0	0	0	0	0	0	0	0	0	0	0
	Actinobacteria_Actinomycetales_Actinomycineae_Actinomycetaceae_Varibaculum_cambriense	0	0	0	0	0	0	0	0	0	0	0	0	0	0	0	0	0	0	0	0	0	0	0	0	0	0	0	0	0	0	0	0	0	0	0	0	0	0	0	0	0	0	0	0	0	0	0	0
	Proteobacteria_Alphaproteobacteria_Rhizobiales_Hyphomicrobiaceae_Vasilyevaea_enhydra	0	0	0	0	0	0	0	0	0	0	0	0	0	0	0	0	0	0	0	0	0	0	0	0	0	0	0	0	0	0	0	0	0	0	0	0	0	0	0	0	0	0	0	0	0	3.83E-05	0	0
	Proteobacteria_Alphaproteobacteria_Rhizobiales_Hyphomicrobiaceae_Vasilyevaea_mishustinii	0	0	0	0	0	0	0	0	0	0	0	0	0	0	0	0	0	0	0	0	0	0	0	0	0	0	0	0	0	0	0	0	0	0	0	0	0	0	0	0	0	0	0	0	0	0.000322602	0	0
	Firmicutes_Negativicutes_Veillonellales_Veillonellaceae_Veillonella_alcalescens	0	0	0.000213612	0	0	0	0	0	0	0	0	0	0	0	0	0	0	0	0.000334153	0	0	0	0	0	0	0	0	0	0	0	0	0	0	0	0	0	0	0	0	0	0	0	0	0	0	0.000349941	0	0
	Firmicutes_Negativicutes_Veillonellales_Veillonellaceae_Veillonella_atypica	0	0	0	0	0	0	0	0	0	7.61E-05	0.00060902	1.40E-05	0	0	0	0	0	0.000176991	0	0	0	8.89E-05	0	0	0	0	0	0	0	0	0	0	0	0	0	0	0	0	0.000218414	0.000238071	0	0.000179593	0	0	0	7.11E-05	0	0
Cluster4	Firmicutes_Negativicutes_Veillonellales_Veillonellaceae_Veillonella_dispar	0	0	0.000102162	0.007925774	0	0	0	0	0	0.001221967	0.028070264	0.002023184	0.002624149	0.000583438	0.0005702	0.008205264	0.001208084	0.000648968	0.000295808	0.00015883	0.000661011	0.000584439	0	0	0	0	0.006626268	0	0	0	0.001661899	0	0	0	0	0	0	0	0	0.017231802	0	0	0	0	0	0.008168934	0	0.00036998
	Firmicutes_Negativicutes_Veillonellales_Veillonellaceae_Veillonella_magna	0	0	0	0	0	0	0	0	0	0	0	0	0	0	0	0	0	0	0	0	0	0	0	0	0	0	0	0	0	0	0	0	0	0	0	0	0	0	0	0	0	0	0	0	0	0	0	0
	Firmicutes_Negativicutes_Veillonellales_Veillonellaceae_Veillonella_montpellierensis	0	0	0	0	0	0	0	0	0	0	0	0	0	0	0	0	0	0	0	0	0	0	0	0	0	0	0	0	0	0	0	0	0	0	0	0	0	0	0	0	0	0	0	0	0	0	0	0
	Firmicutes_Negativicutes_Veillonellales_Veillonellaceae_Veillonella_parvula	0	0	0	3.44E-05	0	0	0	0	0	0.000136901	0.000231528	0	0.000166085	0	0	7.15E-05	0	0	0	0	0.000213397	0.000482797	0	0	0	4.55E-05	0.000170826	0	0	0	0	0	0	0	0	0	0	0	0	0.000124704	0	0	0	0	0	0	0.000289271	0.000149566
	Firmicutes_Negativicutes_Veillonellales_Veillonellaceae_Veillonella_ratti	0	0	0	0	0	0	0.001169635	0.005272143	0	0.000932954	0	0	0	0	0	0	0	0	0	0	0	0	0	0	0	0	0	0	0	0	0.000151082	0	0	0	4.18E-05	0	0	0	0	0	0	0	0	0	0	0	0	0
	Firmicutes_Negativicutes_Veillonellales_Veillonellaceae_Veillonella_rodentium	0	0	0	0	0	0	0	0	0	0	0	0	0	0	0	0	0	0	0	0	0	0	0	0	0	0	0	0	0	0	0	0	0	0	0	0	0	0	0	0	0	0	0	0	0	0	0	0
	Firmicutes_Negativicutes_Veillonellales_Veillonellaceae_Veillonella_rogosae	0	0	0	0	0	0	0	0	0	0	0	0	0	0	0	0	0	0	0	0	0	0	0	0	0	0	0	0	0	0	0	0	0	0	0	0	0	0	0	0	0	0	0	0	0	0	0	0
	Firmicutes_Negativicutes_Veillonellales_Veillonellaceae_Veillonella_sp.	0	0	0	0	0	0	0	0	0	0	0	0	0	0	0	0	0	0	0	0	0	0	0	0	0	0	0	0	0	0	0	0	0	0	0	0	0	0	0	0	0	0	0	0	0	0	0	0
Cluster1	Lentisphaerae_Lentisphaeria_Victivallales_Victivallaceae_Victivallis_vadensis	0	0	0	0.000853898	0	0	0	0	0	0	0	0.000181389	0	0	0	0.002094744	8.21E-05	0	0.0004218	0	0	0	0	0	0	0	0	0	0	0	0	7.09E-05	0	0.000421256	0	0.000634145	0.041309431	0	0	0	0	0.000410498	0.000392784	0.001874837	0.000384784	0.00176064	0	0
	Firmicutes_Bacilli_Bacillales_Bacillaceae_Virgibacillus_byunsanensis	0	0	0	0	0	0	0	0	0	0	0	0	0	0	0	0	0	0	0	0	0	0	0	0	0	0	0	0	0	0	0	0	0	0	0	0	0	0	0	0	0	0	0	0	0	0	0	0
	Firmicutes_Bacilli_Bacillales_Bacillaceae_Virgibacillus_soli	0	0	0	0	0	0	0	0	0	0	0	0	0	0	0	0	0	0	0	0	0	0	0	0	0	0	0	0	0	0	0	0	0	0	0	0	0	0	0	0	0	0	0	0	0	0	0	0
	Firmicutes_Bacilli_Lactobacillales_Leuconostocaceae_Weissella_cibaria	0	0	0	0	0	0	0	0	0	0	0	0	0	0	0	0	0	0	0	0	0	0	0	0	0	0	0	0	0	0	0	0	0	0	0	0	0	0	0	0	0	0	0	0	0	0	0	0
	Firmicutes_Bacilli_Lactobacillales_Leuconostocaceae_Weissella_confusa	0	0	0	0	0	0	0	0	0	0	0	0	0	0	0	0	0	0	0	0	0	0	0	0	0	0	0	0	0	0	0	0	0	0	0	0	0	0	0	0	0	0	0	0	0	0	0	0
	Firmicutes_Bacilli_Lactobacillales_Leuconostocaceae_Weissella_hellenica	0	0	0	0	0	0	0	0	0	0	0	0	0	0	0	0	0	0	0	0	0	0	0	0	0	0	0	0	0	0	0	0	0	0	0	0	0	0	0	0	0	0	0	0	0	0	0	0
	Firmicutes_Bacilli_Lactobacillales_Leuconostocaceae_Weissella_minor	0	0	0	0	0	0	0	0	0	0	0	0	0	0	0	0	0	0	0	0	0	0	0	0	0	0	0	0	0	0	0	0	0	0	0	0	0	0	0	0	0	0	0	0	0	0	0	0
	Firmicutes_Bacilli_Lactobacillales_Leuconostocaceae_Weissella_paramesenteroides	0	0	0	0	0	0	0	0	0	0	0	0	0	0	0	9.20E-05	0	0	0	0	0	0	0	0	0	0	0	0	0	0	0	0	0	0	0	0	0	0	0	0	0	0	0	0	0	0	0	0
	Firmicutes_Bacilli_Lactobacillales_Leuconostocaceae_Weissella_sp.	0	0	0	0	0	0	0	0	0	0	0	0	0	0	0	0.000878771	0	0	0	0	0	0	0	0	0	0	0	0	0	0	0	0	0	0	0	0	0	0	0	0	0	0	0	0	0	0	0	0
	Proteobacteria_Alphaproteobacteria_Rhizobiales_Xanthobacteraceae_Xanthobacter_sp.	0	0	0	0	0	0	0	0	0	0	0	0	0	0	0	0	0	0	0	0	0	0	0	0	0	0	0	0	0	0	0	0	0	0	0	0	0	0	0	0	0	0	0	0	0	0	0	0
	Actinobacteria_Actinobacteria_Micrococcales_Microbacteriaceae_Yonghaparkia_alkaliphila	0	0	0	0	0	0	0	0	0	0	0	0	0	0	0	0	0	0	0	0	0	0	0	0	0	0	0	0	0	0	0	0	0	0	0	0	0	0	0	0	0	0	0	0	0	0	0	0
	Proteobacteria_Betaproteobacteria_Rhodocyclales_Rhodocyclaceae_Zoogloea_caeni	0	0	0	0	0	0	0	0	0	0	0	0	0	0	0	0	0	0	0	0	0	0	0	0	0	0	0	0	0	0	0	0	0	0	0	0	0	0	0	0	0	0	0	0	0	0	0	0
	Proteobacteria_Betaproteobacteria_Rhodocyclales_Rhodocyclaceae_Zoogloea_ramigera	0	0	0	0	0	0	0	0	0	0	0	0	0	0	0	0	0	0	0	0	0	0	0	0	0	0	0	0	0	0	0	0	0	0	0	0	0	0	0	0	0	0	0	0	0	0	0	0
		1	1	1	1	1	1	1	1	1	1	1	1	1	1	1	1	1	1	1	1	1	1	1	1	1	1	1	1	1	1	1	1	1	1	1	1	1	1	1	1	1	1	1	1	1	1	1	1
[truncated: 956 more columns]
